# Supplementary material
Source: PubMed Central journal article supplement (PMC4990316)
Supplement: ja409012q_si_001.pdf [file ja409012q_si_001.pdf]

# Squaramide-Catalyzed Enantioselective Michael Addition of Masked Acyl Cyanides to Substituted Enones

Kin S. Yang, Antoinette E. Nibbs, Yunus E. Türkmen and Viresh H. Rawal\*

*Searle Chemistry Laboratory, Department of Chemistry, The University of Chicago  
5735 South Ellis Avenue, Chicago, IL 60637*

## Table of Contents

|                                                           |      |
|-----------------------------------------------------------|------|
| General Information.....                                  | S-2  |
| Synthesis of MAC Reagents.....                            | S-3  |
| Synthesis of Catalyst <b>VIc</b> .....                    | S-4  |
| Catalyst Screening and Reaction Optimization.....         | S-5  |
| Procedures for Michael Addition Reactions.....            | S-6  |
| Functionalization of <b>5a</b> .....                      | S-22 |
| Functionalization of <b>3a</b> .....                      | S-25 |
| Determination of Absolute configuration.....              | S-27 |
| Total Synthesis of Fornicin <b>C</b> .....                | S-28 |
| Selected NMR Spectra.....                                 | S-32 |
| HPLC Traces of Racemic and Enantioenriched Compounds..... | S-74 |

## General Information

Unless stated otherwise, reactions were performed in oven-dried glassware under a nitrogen atmosphere. Solvents were purified over activated alumina using an Innovative Technology solvent purification system. Acetylmalononitrile, peracetic acid, geranyl bromide, sulfur trioxide pyridine complex, (R) camphorsulfonic acid, tetrabutylammonium fluoride in THF (1M), Hydrogen fluoride triethylamine complex, boron trifluoride etherate, and trimethylsilyl triflate were purchased from Aldrich. Phosphorus pentoxide and acetic acid were purchased from Fisher. All commercially obtained reagents were used as received. Ambient temperature refers to 22–26 °C. Lower temperatures were maintained using ice (0 °C), a Thermo NEXLAB Cryotrol (–40 to 23 °C), iPrOH/CO<sub>2</sub>(s) (–78 °C) baths. Thin-layer chromatography (TLC) was performed using Whatman silica gel 60 Å F254 plates (250 µm) with F-254 fluorescent indicator and visualized by UV fluorescence quenching, ceric ammonium molybdate or potassium permanganate staining. SiliCycle SiliaFlash P60 silica gel (particle size 40–63 µm) was used for flash chromatography. Chiral HPLC was performed on a Agilent HPLC with a Chiralcel® or ChiralPak® OD-H, IA, AS-H or AD-H column (250 mm x 10 mm, 5 µm particle size, 1.0 mL/min flow rate) equipped with a guard, employing a mixture of isopropanol and hexanes. Melting points were measured on a Thomas Hoover Uni-Melt capillary melting point apparatus and are uncorrected. <sup>1</sup>H and <sup>13</sup>C NMR spectra were recorded on Bruker DRX-500 and DMX-500 (at 500 MHz and 125 MHz, respectively) and are reported relative to Me<sub>4</sub>Si (δ 0.0) or residual solvent signals (acetone at 2.05 ppm, DMSO at 2.50 ppm) unless otherwise stated. <sup>13</sup>C NMR spectra were calibrated to residual solvent signals at (CHCl<sub>3</sub> at 77.23 ppm, acetone at 29.84 ppm, DMSO at 39.52 ppm) Data for <sup>1</sup>H NMR spectra are reported as follows: chemical shift (δ ppm) (multiplicity, coupling constant (Hz), integration). Infrared spectra were recorded on a Nicolet 6700 FT-IR spectrometer and are reported in frequency of absorption (cm<sup>-1</sup>) using NaBr salt plates using a thin film. LRMS were recorded on Waters 3100 Mass Detector using electrospray ionization (ESI). High-resolution mass spectra were recorded at Old Dominion University, VA, on a Bruker 12 Tesla APEX Qe FTICR mass spectrometer or an Agilent 6224 Tof-MS (with a Mixed [MM] ionization mode). Optical rotations were measured on a Perkin Elmer 141 polarimeter using a 100 mm path-length cell.

Aryl-Alkyl Enones (**1o-r**)<sup>1</sup>, and **1s**<sup>2</sup> were prepared according to literature procedure. Benzotriazole-derived enone **1m** was prepared as reported by Katritzky.<sup>3</sup> (*E*)-1-phenylbut-2-en-1-one (**1n**) was prepared as reported by Patrick.<sup>4</sup> All other aryl-aryl (**1b-i**) or styrenyl enones (**1j**, **1k**) were prepared according to known literature procedure.<sup>5</sup> MAC reagent **2** and **4** were prepared according to Nemoto.<sup>6</sup> Amine **VIe** and squarate **VIId** were prepared according to literature procedure.<sup>7,8</sup> Aldehyde **16** was prepared from known literature procedures.<sup>9,10</sup>

Regarding reference 2 (a), Professor David A. Evans released an unpublished document that discusses the concept of dissonant/consonant reactivity. It can be accessed online through a Google search of the title of the document: “An Organizational Format for the Classification of Functional Groups”. The first hit from the search provides the correct link to the pdf of the document:

[http://isites.harvard.edu/fs/docs/icb.topic93502.files/Lectures\\_and\\_Handouts/30-Handouts/DAE\\_CD\\_Manuscript.pdf](http://isites.harvard.edu/fs/docs/icb.topic93502.files/Lectures_and_Handouts/30-Handouts/DAE_CD_Manuscript.pdf)<sup>11</sup>

<sup>1</sup> Oare, D. A.; Henderson, M. A.; Sanner, M. A.; Heathcock, C. H., *J. Org. Chem.* **1990**, *55*, 132.

<sup>2</sup> Blay, G.; Fernández, I.; Muñoz, M. C.; Pedro, J. R.; Vila, C. *Chem.—Eur. J.* **2010**, *16*, 9117.

<sup>3</sup> Katritzky, A. R.; Meher, N. K.; Singh, S. K. *J. Org. Chem.* **2005**, *70*, 7792.

<sup>4</sup> Patrick, T. M. *J. Org. Chem.* **1952**, *17*, 1269.

<sup>5</sup> Attar, S.; O'Brien, Z.; Alhaddad, H.; Golden, M. L.; Calderon-Urrea, A. *Bio. Med. Chem.* **2011**, *19*, 2055.

<sup>6</sup> Nemoto, H.; Li, X. M.; Ma, R. J.; Suzuki, I.; Shibuya, M. *Tetrahedron. Lett.* **2003**, *44*, 73.

<sup>7</sup> Berkessel, A.; Mukherjee, S.; Muller, T. N.; Cleemann, F.; Roland, K.; Brandenburg, M.; Neudorfl, J. M.; Lex, J. *Org. Biomol. Chem.* **2006**, *4*, 4319.

<sup>8</sup> Konishi, H.; Lam, T. Y.; Malerich, J. P.; Rawal, V. H. *Org. Lett.* **2010**, *12*, 2028.

<sup>9</sup> Cermak, D. M.; Wiemer, D. F.; Lewis, K.; Hohl, R. J. *Bio. Med. Chem.* **2000**, *8*, 2729.

<sup>10</sup> Dolence, J. M.; Poulter, C. D. *Tetrahedron* **1996**, *52*, 119.

<sup>11</sup> Evans, D.A. An Organizational Format for the Classification of Functional Groups. Applications to the Construction of Difunctional Relationships. [http://isites.harvard.edu/fs/docs/icb.topic93502.files/Lectures\\_and\\_Handouts/30-Handouts/DAE\\_CD\\_Manuscript.pdf](http://isites.harvard.edu/fs/docs/icb.topic93502.files/Lectures_and_Handouts/30-Handouts/DAE_CD_Manuscript.pdf) (accessed 08/30/2013)

**Procedure for the Synthesis of MAC Reagents.**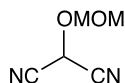

**2-(methoxymethoxy)malononitrile (2):** In a 100-mL round bottom flask equipped with a magnetic stir bar, acetylmalononitrile (1.38 g, 12.77 mmol) was dissolved in 30 mL of water. 9 mL of a 32% of peracetic acid (in AcOH) solution was diluted in 21 mL of acetic acid (now 9.6%) and was added via pipette to the aqueous solution of acetylmalononitrile. The resulting clear solution was stirred at room temperature for 2 h. The stir bar was removed, and the flask was concentrated on a rotary evaporator (20 mm Hg, 30 °C) until most of the volatiles were removed. (~1–2 mL of residue remains) A stir bar was added to the residual clear oil and stirred under high vacuum (<1 mmHg) for 4 h to remove the remaining volatiles. (NOTE: Although we never witnessed any complications, a blast shield was used as a precautionary measure during the concentration of peracetic acid.) The resulting crude whitish residue (hydroxymalononitrile) was suspended in CH<sub>2</sub>Cl<sub>2</sub> (75 mL). Dimethoxymethane (10.2 mL, 0.127 mol) was added in one portion. P<sub>2</sub>O<sub>5</sub> (6.60 g, 23.2 mmol) was then added as a solid in one portion. (Note: The solid P<sub>2</sub>O<sub>5</sub> may clump, preventing efficient stirring, but does not affect the progress of the reaction.) After 14 h, the solvent is decanted from the P<sub>2</sub>O<sub>5</sub> into a separatory funnel and the P<sub>2</sub>O<sub>5</sub> was washed with CH<sub>2</sub>Cl<sub>2</sub> (2x10 mL). The combined organic layer was washed with sat. aq. NaHCO<sub>3</sub> (15 mL, 2x) and brine (15 mL, 1x), dried over Na<sub>2</sub>SO<sub>4</sub>, concentrated, and purified by column chromatography (SiO<sub>2</sub>: 10% EtOAc/Hexanes) to afford 1.00 g of MOM-MAC **2** (62%) as a white crystalline solid.

<sup>1</sup>H NMR (500 MHz; CDCl<sub>3</sub>) δ 5.36 (s, 1H), 4.92 (s, 2H), 3.55 (s, 3H)

<sup>13</sup>C NMR (125 MHz; CDCl<sub>3</sub>) δ 110.6, 96.2, 57.2, 51.9

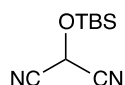

**2-(tert-butyldimethylsilyloxy)malononitrile (4):** In a 100-mL round bottom flask equipped with a magnetic stir bar, acetylmalononitrile (0.7 g, 6.47 mmol) was dissolved in 15 mL of water. 5 mL of a 32% of peracetic acid (in AcOH) solution was diluted in 10 mL of acetic acid (now 10.7%) and was added via pipette to the aqueous solution of acetylmalononitrile. The resulting clear solution was stirred at room temperature for 2 h. The stir bar was removed, and the flask was concentrated on a rotary evaporator (20 mm Hg, 30 °C) until most of the volatiles were removed. (~1–2 mL of residue remains) A stir bar was added to the residual clear oil and stirred under high vacuum (<1 mmHg) for 4 h to remove the remaining volatiles. (NOTE: Although we never witnessed any complications, a blast shield was used as a precautionary measure during the concentration of peracetic acid.) The resulting crude whitish residue (hydroxymalononitrile) was dissolved in 18 mL DMF. The solution was cooled to 0 °C and TBSCl (1.7 g, 9.7 mmol) was added as a solid in one portion. Imidazole (0.66 g, 9.7 mmol) was then added in portions, and the reaction was stirred for 30 min. The reaction was warmed to RT and stirred for an additional 30 min before diluting with 40 mL of Et<sub>2</sub>O. The solution was transferred with a separatory funnel and washed with 30 mL H<sub>2</sub>O, 20 mL aq. NaHCO<sub>3</sub>, and 20 mL brine. The organic layer was dried over MgSO<sub>4</sub>, concentrated and purified by column chromatography (SiO<sub>2</sub>: 2-3% EtOAc/Hexanes) to afford 990 mg of TBS-MAC **4** (78%) as a clear oil.

$^1\text{H NMR}$  (500 MHz;  $\text{CDCl}_3$ )  $\delta$  5.36 (s, 1H), 0.96 (s, 9H), 0.31 (s, 6H)

$^{13}\text{C NMR}$  (125 MHz;  $\text{CDCl}_3$ )  $\delta$  112.4, 50.92, 35.6, 25.2, -5.3

### Synthesis of Catalyst VIc

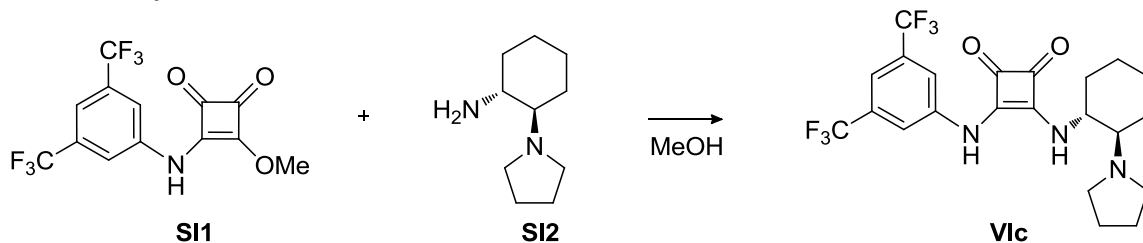

**3-((3,5-bis(trifluoromethyl)phenyl)amino)-4-(((1R,2R)-2-(pyrrolidin-1-yl)cyclohexyl)amino)cyclobut-3-ene-1,2-dione (VIc):** In a 25-mL round bottom flask, amine **SI2**<sup>6</sup> (180 mg, 1.07 mmol) was dissolved in 4 mL of MeOH. Squarate **SI1**<sup>7</sup> (435, mg 1.23 mmol) was added as a solid in one portion resulting in a yellow solution. After 15 min, the product precipitated out. After 16 h, the reaction mixture was diluted with 3 mL of  $\text{Et}_2\text{O}$  and filtered through a Buchner funnel. The product was washed 2x with  $\text{Et}_2\text{O}$  (5 mL), dried, and collected as a white solid (410 mg, 80% yield).

Analytical data for **VIc**:

**IR** (film): 3186, 3139, 2946, 2860, 2791, 1796, 1662, 1578, 1558, 1490, 1459, 1382, 1276, 1182, 1165, 1125

$^1\text{H NMR}$  (500 MHz; DMSO)  $\delta$  10.20 (bs, 1H), 8.06 (s, 2H), 7.80 (bs, 1H), 7.66 (s, 8H), 3.96 (bs, 1H), 2.69 – 2.58 (m, 2H), 2.58 – 2.47 (m, 3H), 2.05 (m, 1H), 1.87 – 1.79 (m, 1H), 1.76 – 1.69 (m, 1H), 1.63 (m, 5H), 1.44 – 1.21 (m, 4H).

$^{13}\text{C NMR}$  (125 MHz; DMSO)  $\delta$  184.45, 180.11, 169.56, 162.12, 141.25, 131.35 (dd,  $J=265, 135$ ), 123.185 (dd,  $J = 2170, 1085$ ), 117.96, 114.49, 62.39, 55.37, 47.64, 32.55, 23.36, 22.77.

**LRMS** (ES): Mass calcd for  $\text{C}_{22}\text{H}_{23}\text{F}_6\text{N}_3\text{O}_2$   $[\text{M}+\text{H}]^+$ , 476. Found  $[\text{M}+\text{H}]^+$ , 476

$[\alpha]^{23.6}_{\text{D}} = -44.8^\circ$  ( $c = 1.0$ , MeOH)

Figure 1: Catalyst screening and reaction optimization

| entry | catalyst         | solvent                         | temp (°C) | time (h) | conversion (%) <sup>c</sup> | ee (%) <sup>d</sup> |
|-------|------------------|---------------------------------|-----------|----------|-----------------------------|---------------------|
| 1     | I                | CH <sub>2</sub> Cl <sub>2</sub> | 23        | 15       | 62                          | 8                   |
| 2     | II               | CH <sub>2</sub> Cl <sub>2</sub> | 23        | 15       | 23                          | -63                 |
| 3     | III              | CH <sub>2</sub> Cl <sub>2</sub> | 23        | 15       | 48                          | -81                 |
| 4     | IV               | CH <sub>2</sub> Cl <sub>2</sub> | 23        | 15       | 62                          | 79                  |
| 5     | V                | CH <sub>2</sub> Cl <sub>2</sub> | 23        | 15       | 44                          | -57                 |
| 6     | VIa              | CH <sub>2</sub> Cl <sub>2</sub> | 23        | 23       | 91                          | 84                  |
| 7     | VIb              | CH <sub>2</sub> Cl <sub>2</sub> | 23        | 15       | 95                          | 80                  |
| 8     | VIc              | CH <sub>2</sub> Cl <sub>2</sub> | 23        | 23       | 99                          | 90                  |
| 9     | VIc              | CH <sub>2</sub> Cl <sub>2</sub> | -30       | 15       | 86                          | 97                  |
| 10    | VIc              | CH <sub>2</sub> Cl <sub>2</sub> | 23        | 2        | 81                          | 91                  |
| 11    | VIc <sup>e</sup> | CH <sub>2</sub> Cl <sub>2</sub> | 23        | 2        | 65                          | 90                  |
| 12    | VIc <sup>f</sup> | CH <sub>2</sub> Cl <sub>2</sub> | 23        | 2        | 85                          | 91                  |
| 13    | VIc              | THF                             | 23        | 3        | 17                          | 71                  |
| 14    | VIc              | MeOH                            | 23        | 3        | 95                          | 8                   |
| 15    | VIc              | Toluene                         | 23        | 3        | 20                          | 81                  |
| 16    | VIc              | DCE                             | 23        | 3        | 75                          | 91                  |
| 17    | VIc              | MeCN                            | 23        | 3        | 71                          | 40                  |
| 18    | VIc              | Hexanes                         | 23        | 3        | 72                          | 88                  |

<sup>a</sup>Conditions: Reactions performed with **1a** (0.1 mmol), **2** (0.1 mmol), catalyst (5 mol %), solvent (1 mL). <sup>c</sup>Conversion determined by 500 MHz <sup>1</sup>H NMR spectroscopy. <sup>d</sup>Enantiomeric excess determined by Chiralcel IA. <sup>e</sup>Reaction run with 1 mol % catalyst. <sup>f</sup>Reaction run with 10 mol % catalyst.

### General Procedure for the Michael Addition of MAC Reagents to Enones

To a 16 x 125 mm test tube equipped with a teflon-coated magnetic stir bar was added enone (0.36 mmol), MAC (0.3 mmol), and CH<sub>2</sub>Cl<sub>2</sub> (0.6 mL, 0.5 M). The test tube was capped with a septum, purged with N<sub>2</sub>, and set to the desired temperature. The reaction was allowed to stir for 15 min at the desired temperature before catalyst **VIc** (0.015 mmol) was added as a solid in one portion. The reaction was analyzed by <sup>1</sup>H NMR and TLC for conversion to product. Upon completion, the reaction was concentrated in vacuo to afford a sticky residue. Purification by flash column chromatography produced the desired product.

## Michael Addition Reactions

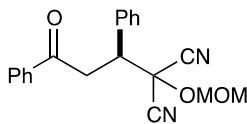

**(S)-2-(methoxymethoxy)-2-(3-oxo-1,3-diphenylpropyl)malononitrile (3a):** Prepared according to modified general procedure using enone **1a** (750 mg, 3.6 mmol), MAC **2** (378 mg, 3.0 mmol), and catalyst **VIc** (71.3 mg, 0.15 mmol) in CH<sub>2</sub>Cl<sub>2</sub> (6 mL) at -30 °C for 24 h. After concentration, the reaction mixture was treated with 10 mL of Et<sub>2</sub>O, and filtered to isolate the catalyst (60 mg, 84% recovery), The filtrate is concentrated and purified by flash column chromatography (SiO<sub>2</sub>, 10 - 15% EtOAc/Hexanes) to afford 983 mg (98%) of **3a** as a colorless oil.

Analytical data for **3a**:

**IR** (film): 3064, 3035, 2940, 2832, 1688, 1597, 1581, 1498, 1449, 1419, 1367, 1348, 1277, 1220, 1164, 1110, 1066, 1027, 1003, 966, 923, 769, 751, 713, 690, 643

**<sup>1</sup>H NMR** (500 MHz; CDCl<sub>3</sub>) δ 7.94 (dd, *J* = 8.3, 1.4 Hz, 2H), 7.62 – 7.56 (m, 1H), 7.54 – 7.50 (m, 4H), 7.47 (t, *J* = 7.8 Hz, 3H), 7.41 – 7.33 (m, 4H), 5.06 (d, *J* = 7.2 Hz, 1H), 5.04 (d, *J* = 7.2 Hz, 1H), 4.27 (dd, *J* = 9.7, 3.5 Hz, 1H), 3.87 (dd, *J* = 17.4, 9.7 Hz, 1H), 3.69 (dd, *J* = 17.4, 3.6 Hz, 1H), 3.47 (s, 3H)

**<sup>13</sup>C NMR** (125 MHz; CDCl<sub>3</sub>) δ 195.2, 136.4, 134.3, 133.8, 129.7 (x2), 129.3, 129.0 (x2), 128.9 (x2), 128.2 (x2), 112.7 (x2), 96.7, 70.1, 57.6, 49.5, 38.7

**HRMS** (MM) Mass calcd for C<sub>20</sub>H<sub>18</sub>N<sub>2</sub>O<sub>3</sub> [M+Na]<sup>+</sup>, 357.1215. Found [M+Na]<sup>+</sup>, 357.1207

[α]<sub>D</sub><sup>23.6</sup> = -28.5° (c = 1.0, CHCl<sub>3</sub>)

Enantiomeric excess (97% ee) was measured by HPLC (Chiralcel IA, 3% IPA/Hexanes, 1 mL/min, Rt<sub>1</sub> = 14.0, Rt<sub>2</sub> = 16.98

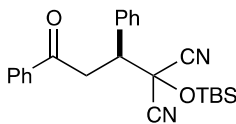

**(S)-2-((tert-butyldimethylsilyl)oxy)-2-(3-oxo-1,3-diphenylpropyl)malononitrile (5a):** Prepared according to general procedure using enone **1a** (750 mg, 3.6 mmol), MAC **4** (589.0 mg, 3.0 mmol), and catalyst **VIc** (71.3 mg, 0.15 mmol) in CH<sub>2</sub>Cl<sub>2</sub> (6 mL) at -20 °C for 36 h. After concentration, the reaction mixture was treated with 10 mL of Et<sub>2</sub>O, and filtered to isolate the catalyst (57 mg, 80% recovery), The filtrate is concentrated and purified by flash column chromatography (SiO<sub>2</sub>, 3-4% EtOAc/Hexanes) to afford 1.16 g (96%) of **5a** as a colorless oil.

Analytical data for **5a**:

**IR** (film): 3065, 3036, 2956, 2932, 2887, 2860, 1691, 1597, 1581, 1498, 1472, 1464, 1449, 1364, 1266, 1219, 1131, 1004, 844, 788, 750, 690.

**<sup>1</sup>H NMR** (500 MHz; CDCl<sub>3</sub>) δ 7.97 – 7.91 (m, 2H), 7.63 – 7.56 (m, 1H), 7.51 – 7.44 (m, 4H), 7.40 –

7.30 (m, 3H), 4.18 (dd,  $J = 9.7, 3.6$  Hz, 1H), 3.84 (dd,  $J = 17.4, 9.8$  Hz, 1H), 3.65 (dd,  $J = 17.4, 3.6$  Hz, 1H), 0.90 (s, 9H), 0.30 (s, 3H), 0.29 (s, 3H).

$^{13}\text{C}$  NMR (125 MHz;  $\text{CDCl}_3$ )  $\delta$  195.2, 136.4, 134.4, 133.8, 129.7 (x2), 129.2, 128.9 (x2), 128.8 (x2), 128.2 (x2), 114.7 (x2), 68.0, 51.1, 38.4, 25.3 (x3), 18.2, -4.5, -4.6

HRMS (MM) Mass calcd for  $\text{C}_{24}\text{H}_{28}\text{N}_2\text{O}_2\text{Si}$   $[\text{M}+\text{Na}]^+$ , 427.1818. Found  $[\text{M}+\text{Na}]^+$ , 427.1809

$[\alpha]_D^{23.6} = -25.4^\circ$  ( $c = 1.0$ ,  $\text{CHCl}_3$ )

Enantiomeric excess (96% ee) was measured by HPLC (Chiralcel IA, 2% IPA/Hexanes, 1 mL/min,  $\text{Rt}_1 = 7.2$ ,  $\text{Rt}_2 = 9.1$ )

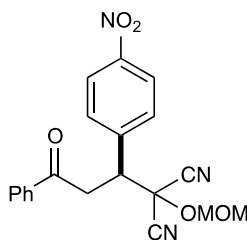

**(S)-2-(methoxymethoxy)-2-(1-(4-nitrophenyl)-3-oxo-3-phenylpropyl)malononitrile (3b)**: Prepared according to general procedure using enone **1b** (91 mg, 0.36 mmol), MAC **2** (38 mg, 0.3 mmol), and catalyst **VIc** (7.1 mg, 0.015 mmol) in  $\text{CH}_2\text{Cl}_2$  (0.6 mL) at  $-30^\circ\text{C}$  for 20 h. Purified by flash column chromatography ( $\text{SiO}_2$ , 15 – 25 % EtOAc/Hexanes) to afford 112 mg (98%) of **1b** as a colorless oil.

Analytical data for **1b**:

IR (film): 3083, 2942, 2850, 1688, 1653, 1599, 1524, 1449, 1350, 1277, 1221, 1164, 1110, 1077, 1032, 968, 924, 859, 753, 737, 720, 690

$^1\text{H}$  NMR (500 MHz;  $\text{CDCl}_3$ )  $\delta$  8.22 (dd,  $J = 8.8, 1.2$  Hz, 2H), 7.93 (dd,  $J = 8.4, 1.4$  Hz, 2H), 7.73 – 7.67 (m, 2H), 7.61 (tq,  $J = 7.4, 1.2$  Hz, 1H), 7.52 – 7.44 (m, 2H), 5.08 (d,  $J = 7.2$  Hz, 1H), 5.07 (d,  $J = 7.2$  Hz, 1H), 4.36 (dd,  $J = 10.4, 3.2$  Hz, 1H), 3.93 (dd,  $J = 17.8, 10.4$  Hz, 1H), 3.76 (dd,  $J = 17.7, 3.2$  Hz, 1H), 3.49 (s, 3H)

$^{13}\text{C}$  NMR (125 MHz;  $\text{CDCl}_3$ )  $\delta$  194.5, 148.4, 141.7, 135.8, 134.2, 130.8 (x2), 129.0 (x2), 128.2 (x2), 124.0 (x2), 112.3 (x2), 96.9, 69.1, 57.7, 49.3, 38.7

LRMS (ES): Mass calcd for  $\text{C}_{20}\text{H}_{17}\text{N}_3\text{O}_5$   $[\text{M}+\text{H}]^+$ , 380. Found  $[\text{M}+\text{H}]^+$ , 380

$[\alpha]_D^{23.6} = -70^\circ$  ( $c = 1.0$ ,  $\text{CHCl}_3$ )

Enantiomeric excess (97% ee) was measured by HPLC (Chiralcel IA, 15% EtOH/Hexanes, 1 mL/min,  $\text{Rt}_1 = 18.2$ ,  $\text{Rt}_2 = 23.1$ )

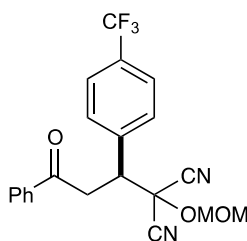

**(S)-2-(methoxymethoxy)-2-(1-(4-trifluoromethylphenyl)-3-oxo-3-phenylpropyl)malononitrile (3c):** Prepared according to general procedure using enone **1c** (99 mg, 0.36 mmol), MAC **2** (38 mg, 0.30 mmol), and catalyst **VIc** (7.1 mg, 0.015 mmol) in  $\text{CH}_2\text{Cl}_2$  (0.6 mL) at  $-30^\circ\text{C}$  for 24 h. Purified by flash column chromatography ( $\text{SiO}_2$ , 15% EtOAc/Hexanes) to afford 118 mg (98%) of **3c** as a colorless oil.

Analytical data for **3c**:

**IR** (film): 3063, 2963, 2942, 2850, 2834, 1689, 1621, 1597, 1450, 1425, 1328, 1301, 1278, 1222, 1166, 1119, 1069, 1033, 1018, 968, 924, 852, 764, 689

**$^1\text{H}$  NMR** (500 MHz;  $\text{CDCl}_3$ )  $\delta$  7.94 (dd,  $J = 8.4, 1.4$  Hz, 2H), 7.64 (s, 4H), 7.62 – 7.58 (m, 1H), 7.51 – 7.45 (m, 2H), 5.08 (d,  $J = 7.2$  Hz, 1H), 5.06 (d,  $J = 7.2$  Hz, 1H), 4.34 (dd,  $J = 10.1, 3.3$  Hz, 1H), 3.92 (dd,  $J = 17.7, 10.1$  Hz, 1H), 3.74 (dd,  $J = 17.7, 3.3$  Hz, 1H), 3.48 (s, 3H).

**$^{13}\text{C}$  NMR** (125 MHz;  $\text{CDCl}_3$ )  $\delta$  194.7, 138.5, 138.5, 136.0, 134.0, 130.2 (x3), 129.0 (x3), 128.1 (x3), 125.9 (q,  $J = 7.3, 3.6$  Hz, 1H), 112.5, 112.4, 96.9, 69.4, 57.6, 49.2, 38.6

**LRMS** (ES): Mass calcd for  $\text{C}_{21}\text{H}_{17}\text{F}_3\text{N}_2\text{O}_3$   $[\text{M}+\text{H}]^+$ , 403. Found  $[\text{M}+\text{H}]^+$ , 403

$[\alpha]_D^{23.6} = -49.4^\circ$  ( $c = 1.0$ ,  $\text{CHCl}_3$ )

Enantiomeric excess (97% ee) was measured by HPLC (Chiralcel OD-H, 4% IPA/Hexanes, 1 mL/min,  $\text{Rt}_1 = 13.7$ ,  $\text{Rt}_2 = 17.4$ )

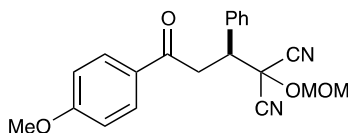

**(S)-2-(methoxymethoxy)-2-(3-(4-methoxyphenyl)-3-oxo-1-phenylpropyl)malononitrile (3d):** Prepared according to general procedure using enone **1d** (86 mg, 0.36 mmol), MAC **2** (38 mg, 0.30 mmol), and catalyst **VIc** (7.1 mg, 0.015 mmol) in  $\text{CH}_2\text{Cl}_2$  (0.6 mL) at  $0^\circ\text{C}$  for 28 h. Purified by flash column chromatography ( $\text{SiO}_2$ , 15-20% EtOAc/Hexanes) to afford 110 mg (99%) of **3d** as a colorless oil.

Analytical data for **3d**:

**IR** (film): 3064, 3035, 3009, 2962, 2939, 2841, 1678, 1601, 1575, 1512, 1456, 1421, 1367, 1348, 1311, 1292, 1263, 1227, 1170, 1111, 1065, 1028, 967, 925, 836, 704

**$^1\text{H}$  NMR** (500 MHz;  $\text{CDCl}_3$ )  $\delta$  7.92 (d,  $J = 9.0$  Hz, 2H), 7.50 (dd,  $J = 8.0, 1.7$  Hz, 2H), 7.39 – 7.31 (m, 3H), 6.93 (d,  $J = 8.9$  Hz, 2H), 5.05 (d,  $J = 7.2$  Hz, 1H), 5.03 (d,  $J = 7.2$  Hz, 1H), 4.27 (dd,  $J = 9.7, 3.6$  Hz, 1H), 3.85 (s, 4H), 3.83 (dd,  $J = 17.2, 9.8$  Hz, 1H), 3.62 (dd,  $J = 17.2, 3.6$  Hz, 1H), 3.46 (s, 3H).



$^{13}\text{C}$  NMR (125 MHz;  $\text{CDCl}_3$ )  $\delta$  193.6, 164.0, 134.5, 130.5 (x2), 129.6 (x2), 129.4, 129.1, 128.9 (x2), 114.0 (x2), 112.7 (x2), 96.6, 70.1, 57.5, 55.6, 49.6, 38.2

LRMS (ES): Mass calcd for  $\text{C}_{21}\text{H}_{20}\text{N}_2\text{O}_4$   $[\text{M}+\text{H}]^+$ , 365. Found  $[\text{M}+\text{H}]^+$ , 365

$[\alpha]_D^{23.6} = -51.9^\circ$  ( $c = 1.0$ ,  $\text{CHCl}_3$ )

Enantiomeric excess (92% ee) was measured by HPLC (Chiralcel IA, 10% EtOH/Hexanes, 1 mL/min,  $\text{Rt}_1 = 19.08$ ,  $\text{Rt}_2 = 20.90$ )

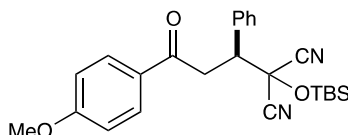

**(S)-2-((tert-butyldimethylsilyloxy)-2-(3-(4-methoxyphenyl)-3-oxo-1-phenylpropyl)malononitrile (5d)**: Prepared according to general procedure using enone **1d** (84 mg, 0.36 mmol), MAC **4** (59 mg, 0.30 mmol), and catalyst **VIc** (7.1 mg, 0.015 mmol) in  $\text{CH}_2\text{Cl}_2$  (0.6 mL) at 0 °C for 72h. Purified by flash column chromatography ( $\text{SiO}_2$ , 5  $\rightarrow$  10 %  $\text{Et}_2\text{O}$ /Hexanes) to afford 124 mg (96%) of **5d** as a colorless oil.

Analytical data for **5d**:

IR (film): 3065, 3036, 3009, 2956, 2933, 2899, 2860, 1681, 1601, 1576, 1512, 1471, 1464, 1456, 1421, 1364, 1263, 1225, 1171, 1131, 1030, 843, 787, 701, 681

$^1\text{H}$  NMR (500 MHz;  $\text{CDCl}_3$ )  $\delta$  7.93 (d,  $J = 8.9$  Hz, 2H), 7.48 (dd,  $J = 8.0$ , 1.7 Hz, 2H), 7.38 – 7.30 (m, 3H), 6.93 (d,  $J = 8.9$  Hz, 2H), 4.20 (dd,  $J = 9.7$ , 3.6 Hz, 1H), 3.84 (s, 3H), 3.81 (dd,  $J = 17.2$ , 9.7 Hz, 1H), 3.61 (dd,  $J = 17.2$ , 3.6 Hz, 1H), 0.91 (s, 9H), 0.31 (s, 3H), 0.30 (s, 3H).

$^{13}\text{C}$  NMR (125 MHz;  $\text{CDCl}_3$ )  $\delta$  193.5, 163.9, 134.6, 130.4 (x2), 129.6 (x2), 129.4, 129.0, 128.7 (x2), 114.7 (x2), 114.0 (x2), 68.0, 55.5, 51.1, 37.9, 25.3 (x3), 18.13, -4.6, -4.7

LRMS (ES): Mass calcd for  $\text{C}_{25}\text{H}_{30}\text{N}_2\text{O}_3\text{Si}$   $[\text{M}+\text{H}]^+$ , 435. Found  $[\text{M}+\text{H}]^+$ , 435

$[\alpha]_D^{23.6} = -42.7^\circ$  ( $c = 1.0$ ,  $\text{CHCl}_3$ )

Enantiomeric excess (90% ee) was measured by HPLC (Chiralcel OD-H, 4% IPA/Hexanes, 1 mL/min,  $\text{Rt}_1 = 7.3$ ,  $\text{Rt}_2 = 8.6$ )

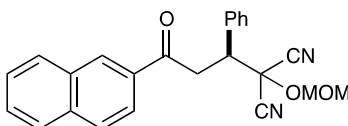

**(S)-2-(methoxymethoxy)-2-(3-(naphthalen-2-yl)-3-oxo-1-phenylpropyl)malononitrile (3e)**: Prepared according to general procedure using enone **1e** (93 mg, 0.36 mmol), MAC **2** (38 mg, 0.30 mmol), and catalyst **VIc** (7.1 mg, 0.015 mmol) in  $\text{CH}_2\text{Cl}_2$  (6 mL) at -30 °C for 24 h. Purified by flash column chromatography ( $\text{SiO}_2$ , 10 – 15% EtOAc/Hexanes) to afford 114 mg (99%) of **3e** as a colorless oil.

Analytical data for **3e**:

**IR** (film): 3062, 3035, 2962, 1684, 1628, 1470, 1456, 1437, 1371, 1292, 1279, 1216, 1184, 1164, 1125, 1110, 1065, 1029, 967, 929, 862, 824, 744, 703

**<sup>1</sup>H NMR** (500 MHz; CDCl<sub>3</sub>) δ 8.49 (s, 1H), 8.00 (dd, *J* = 8.1, 1.2 Hz, 1H), 7.97 (dd, *J* = 8.6, 1.7 Hz, 1H), 7.89 (d, *J* = 6.1 Hz, 1H), 7.88 – 7.86 (m, 1H), 7.64 – 7.58 (m, 2H), 7.56 (m, 2H), 7.41 – 7.33 (m, 3H), 5.09 (dd, *J* = 7.1, 0.7 Hz, 1H), 5.07 (dd, *J* = 7.2, 0.8 Hz, 1H), 4.34 (ddd, *J* = 9.7, 3.6, 1.5 Hz, 1H), 4.02 (ddd, *J* = 17.2, 9.7, 1.3 Hz, 1H), 3.82 (ddd, *J* = 17.3, 3.7, 1.3 Hz, 1H), 3.49 (s, 3H).

**<sup>13</sup>C NMR** (125 MHz; CDCl<sub>3</sub>) δ 195.1, 135.9, 134.4, 133.7, 132.5, 130.0, 129.7 (x3), 129.3, 129.0 (x3), 128.8, 127.9, 127.2, 123.7, 112.8, 112.7, 96.7, 70.1, 57.6, 49.6, 38.7

**LRMS** (ES): Mass calcd for C<sub>24</sub>H<sub>20</sub>N<sub>2</sub>O<sub>3</sub> [M+H]<sup>+</sup>, 385. Found [M+H]<sup>+</sup>, 385

[α]<sub>D</sub><sup>23.6</sup> = -92.7° (c = 1.0, CHCl<sub>3</sub>)

Enantiomeric excess (98% ee) was measured by HPLC (Chiralcel IA, 7% EtOH/Hexanes, 1 mL/min, Rt<sub>1</sub> = 15.5, Rt<sub>2</sub> = 18.7

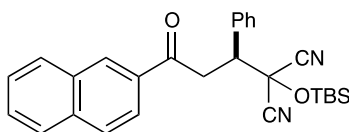

**(S)-2-((tert-butyldimethylsilyloxy)-2-(3-(naphthalen-2-yl)-3-oxo-1-phenylpropyl)malononitrile** (**5e**): Prepared according to general procedure using enone **1e** (93 mg, 0.36 mmol), MAC **4** (59 mg, 0.3 mmol), and catalyst **VIc** (7.1 mg, 0.3 mmol) in CH<sub>2</sub>Cl<sub>2</sub> (0.6 mL) at -20 °C for 36 h. Purified by flash column chromatography (SiO<sub>2</sub>, 5 → 10 % Et<sub>2</sub>O/Hexanes) to afford 130 mg (95%) of **5e** as a colorless oil.

Analytical data for **5e**:

**IR** (film): 3062, 3036, 2955, 2932, 2886, 2860, 1685, 1628, 1597, 1498, 1471, 1364, 1267, 1215, 1185, 1126, 1005, 943, 898, 844, 787, 744, 701

**<sup>1</sup>H NMR** (500 MHz; CDCl<sub>3</sub>) δ 8.48 (s, 1H), 7.99 (ddd, *J* = 10.5, 8.4, 1.5 Hz, 2H), 7.92 – 7.86 (m, 2H), 7.63 (ddd, *J* = 8.1, 6.8, 1.4 Hz, 1H), 7.58 (ddd, *J* = 8.1, 6.9, 1.4 Hz, 1H), 7.55 – 7.50 (m, 2H), 7.42 – 7.32 (m, 3H), 4.27 (dd, *J* = 9.7, 3.6 Hz, 1H), 4.00 (dd, *J* = 17.2, 9.7 Hz, 1H), 3.80 (dd, *J* = 17.2, 3.7 Hz, 1H), 0.92 (s, 9H), 0.33 (s, 3H), 0.33 (s, 3H).

**<sup>13</sup>C NMR** (125 MHz; CDCl<sub>3</sub>) δ 195.1, 135.9, 134.5, 133.8, 132.5, 130.0, 129.8, 129.7 (x2), 129.1, 128.9, 128.8 (x2), 128.8, 127.9, 127.1, 123.7, 114.8, 114.7, 68.0, 51.3, 38.5, 25.4 (x3), 18.2, -4.5, -4.6

**LRMS** (ES): Mass calcd for C<sub>28</sub>H<sub>30</sub>N<sub>2</sub>O<sub>2</sub>Si [M+H]<sup>+</sup>, 455. Found [M+H]<sup>+</sup>, 455

[α]<sub>D</sub><sup>23.6</sup> = -85.7° (c = 1.0, CHCl<sub>3</sub>)

Enantiomeric excess (97% ee) was measured by HPLC (Chiralcel OD-H, 2% IPA/Hexanes, 1 mL/min, Rt<sub>1</sub> = 9.2, Rt<sub>2</sub> = 10.8

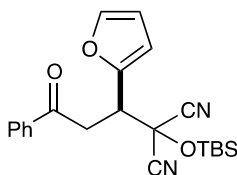**(S)-2-((tert-butyldimethylsilyloxy)-2-(1-furan-2-yl)-3-oxo-3-phenylpropyl)malononitrile (5f):**

Prepared according to general procedure using enone **1f** (71 mg, 0.36 mmol), MAC **4** (59 mg, 0.30 mmol), and catalyst **VIc** (7.1 mg, 0.015 mmol) in CH<sub>2</sub>Cl<sub>2</sub> (0.6 mL) at 0 °C for 24 h. Purified by flash column chromatography (SiO<sub>2</sub>, 5% Et<sub>2</sub>O/Hexanes) to afford 110 mg (93%) of **5f** as a colorless oil.

Analytical data for **5f**:

**IR** (film): 2955, 2932, 2887, 2860, 1692, 1598, 1472, 1449, 1363, 1267, 1218, 1137, 1015, 845, 788, 759, 743, 689

**<sup>1</sup>H NMR** (500 MHz; CDCl<sub>3</sub>) δ 8.02 – 7.93 (m, 2H), 7.65 – 7.56 (m, 1H), 7.49 (dd, *J* = 8.3, 7.2 Hz, 2H), 7.40 (dd, *J* = 1.8, 0.8 Hz, 1H), 6.49 (dd, *J* = 3.3, 0.6 Hz, 1H), 6.36 (dd, *J* = 3.3, 1.8 Hz, 1H), 4.36 (dd, *J* = 10.0, 3.3 Hz, 1H), 3.88 (dd, *J* = 17.3, 10.0 Hz, 1H), 3.53 (dd, *J* = 17.4, 3.3 Hz, 1H), 0.90 (s, 9H), 0.34 (s, 3H), 0.33 (s, 3H).

**<sup>13</sup>C NMR** (125 MHz; CDCl<sub>3</sub>) δ 194.9, 147.9, 143.4, 136.2, 133.8, 128.9 (x2), 128.2 (x2), 114.4 (x2), 110.9 (x2), 66.8, 45.5, 36.8, 25.2 (x3), 18.1, -4.6 (x2).

**LRMS** (ES): Mass calcd for C<sub>22</sub>H<sub>26</sub>N<sub>2</sub>O<sub>3</sub>Si [M+Na]<sup>+</sup>, 417. Found [M+H]<sup>+</sup>, 417

[α]<sub>D</sub><sup>23.6</sup> = -10° (c = 1.0, CHCl<sub>3</sub>)

Enantiomeric excess (90% ee) was measured by HPLC (Chiralcel AD-H, 2% IPA/Hexanes, 1 mL/min, Rt<sub>1</sub> = 6.38, Rt<sub>2</sub> = 6.80

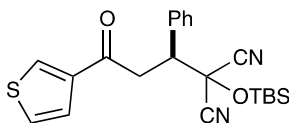**(S)-2-((tert-butyldimethylsilyloxy)-2-(3-oxo-1-phenyl-3-(thiophen-3-yl)propyl)malononitrile (5g):**

Prepared according to general procedure using enone **1g** (77 mg, 0.36 mmol), MAC **4** (59 mg, 0.30 mmol), and catalyst **VIc** (7.1 mg, 0.015 mmol) in CH<sub>2</sub>Cl<sub>2</sub> (0.6 mL) at -10 °C for 48 h. Purified by flash column chromatography (SiO<sub>2</sub>, 5 – 10 % Et<sub>2</sub>O/Hexanes) to afford 116 mg (94%) of **5g** as a colorless oil.

Analytical data for **5g**:

**IR** (film): 3109, 3066, 3035, 2955, 2932, 2886, 2860, 1682, 1512, 1498, 1472, 1464, 1456, 1412, 1266, 1231, 1174, 1131, 1093, 1077, 1052, 1005, 941, 844, 787, 760, 700

**<sup>1</sup>H NMR** (500 MHz; CDCl<sub>3</sub>) δ 8.10 (dd, *J* = 2.9, 1.3 Hz, 1H), 7.51 (dd, *J* = 5.1, 1.3 Hz, 1H), 7.49 – 7.45 (m, 2H), 7.39 – 7.32 (m, 3H), 7.31 (dd, *J* = 5.1, 2.9 Hz, 1H), 4.16 (dd, *J* = 9.5, 3.9 Hz, 1H), 3.71 (dd, *J* = 17.2, 9.5 Hz, 1H), 3.58 (dd, *J* = 17.1, 3.9 Hz, 1H), 0.90 (s, 9H), 0.30 (s, 3H), 0.29 (s, 3H).

**<sup>13</sup>C NMR** (125 MHz; CDCl<sub>3</sub>) δ 189.3, 141.6, 134.4, 132.5, 129.6 (x2), 129.1, 128.8 (x2), 126.9 (x2), 114.7, 114.6, 67.9, 51.0, 39.5, 25.3, 18.2, -4.6, -4.7

LRMS (ES): Mass calcd for C<sub>22</sub>H<sub>26</sub>N<sub>2</sub>O<sub>2</sub>SSi [M+H]<sup>+</sup>, 411. Found [M+H]<sup>+</sup>, 411

[ $\alpha$ ]<sub>D</sub><sup>23.6</sup> = -29.2° (c = 1.0, CHCl<sub>3</sub>)

Enantiomeric excess (90% ee) was measured by HPLC (Chiralcel OD-H, 2% IPA/Hexanes, 1 mL/min, Rt<sub>1</sub> = 8.5, Rt<sub>2</sub> = 11.0

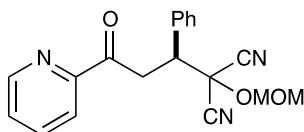

**(S)-2-(methoxymethoxy)-2-(3-oxo-1-phenyl-3-(pyridin-2-yl)propyl)malononitrile (3h):** Prepared according to general procedure using enone **1h** (75 mg, 0.36 mmol), MAC **2** (38 mg, 0.30 mmol), and catalyst **VIc** (7.1 mg, 0.015 mmol) in CH<sub>2</sub>Cl<sub>2</sub> (0.6 mL) at -30 °C for 30 h. Purified by flash column chromatography (SiO<sub>2</sub>, 15% EtOAc/Hexanes) to afford 98 mg (98%) of **3h** as a colorless oil.

Analytical data for **3h**:

**IR** (film): 3060, 3035, 3008, 2962, 2940, 2849, 2832, 1702, 1584, 1570, 1456, 1438, 1366, 1347, 1300, 1282, 1221, 1164, 1110, 1067, 1030, 996, 962, 926, 765, 700

**<sup>1</sup>H NMR** (500 MHz; CDCl<sub>3</sub>) δ 8.74 – 8.68 (m, 1H), 7.93 (dt, *J* = 7.8, 1.1 Hz, 1H), 7.79 (td, *J* = 7.7, 1.7 Hz, 1H), 7.52 (dd, *J* = 7.9, 1.7 Hz, 2H), 7.48 (ddd, *J* = 7.5, 4.7, 1.2 Hz, 1H), 7.38 – 7.29 (m, 3H), 5.04 (d, *J* = 7.2 Hz, 1H), 5.02 (d, *J* = 7.2 Hz, 1H), 4.31 – 4.24 (m, 2H), 3.88 (dd, *J* = 14.4, 10.5 Hz, 1H), 3.46 (s, 3H).

**<sup>13</sup>C NMR** (125 MHz; CDCl<sub>3</sub>) δ 197.3, 152.6, 149.2, 137.1, 134.4, 129.9 (x2), 129.1, 128.8 (x2), 127.7, 122.1, 112.9, 112.6, 96.6, 70.2, 57.5, 49.7, 37.9

LRMS (ES): Mass calcd for C<sub>19</sub>H<sub>17</sub>N<sub>3</sub>O<sub>3</sub> [M+H]<sup>+</sup>, 336. Found [M+H]<sup>+</sup>, 336

[ $\alpha$ ]<sub>D</sub><sup>23.6</sup> = -35.8° (c = 1.0, CHCl<sub>3</sub>)

Enantiomeric excess (92% ee) was measured by HPLC (Chiralcel IA, 7% IPA/Hexanes, 1 mL/min, Rt<sub>1</sub> = 11.3, Rt<sub>2</sub> = 12.2

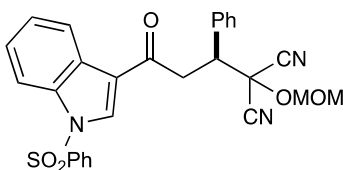

**(S)-2-(methoxymethoxy)-2-(3-oxo-1-phenyl-3-(1-benzenesulfonyl-1H-indol-3-yl)propyl)malononitrile (3i):** Prepared according to general procedure using enone **1i** (140 mg, 0.36 mmol), MAC **2** (38 mg, 0.30 mmol), and catalyst **VIc** (7.1 mg, 0.015 mmol) in CH<sub>2</sub>Cl<sub>2</sub> (0.6 mL) at 0 °C for 36 h. Purified by flash column chromatography (SiO<sub>2</sub>, 30% EtOAc/Hexanes) to afford 150 mg (97%) of **3i** as a thick amorphous solid.

Analytical data for **3i**:

**IR** (film): 3130, 3063, 3035, 3008, 2962, 2939, 2905, 2849, 2832, 1669, 1605, 1584, 1539, 1497, 1479, 1448, 1385, 1338, 1292, 1267, 1167, 1139, 1109, 1087, 1026, 987, 922, 751, 732, 700, 684, 593, 571, 552

**<sup>1</sup>H NMR** (500 MHz; CDCl<sub>3</sub>) δ 8.34 – 8.29 (m, 1H), 8.23 (d, *J* = 8.1 Hz, 1H), 7.96 (d, *J* = 8.6 Hz, 2H), 7.91 (d, *J* = 8.3 Hz, 1H), 7.65 – 7.57 (m, 1H), 7.57 – 7.48 (m, 4H), 7.42 – 7.33 (m, 4H), 7.33 – 7.28 (m, 1H), 5.07 (d, *J* = 7.4 Hz, 2H), 5.06 (d, *J* = 7.8 Hz, 1H), 4.32 – 4.25 (m, 1H), 3.83 – 3.73 (m, 1H), 3.67 – 3.59 (m, 1H), 3.47 (s, 3H)

**<sup>13</sup>C NMR** (125 MHz; CDCl<sub>3</sub>) δ 190.6, 137.5, 134.9 (x3), 134.3, 131.9, 129.8 (x2), 129.7, 129.3, 129.0 (x2), 127.4, 127.3 (x2), 126.2, 125.2, 123.2, 121.0, 113.2, 112.8, 112.6, 96.7, 70.0, 57.6, 49.5, 40.0.

**LRMS** (ES): Mass calcd for C<sub>28</sub>H<sub>23</sub>N<sub>3</sub>O<sub>5</sub>S [M–C<sub>3</sub>H<sub>4</sub>NO]<sup>+</sup>, 443. Found [M+H]<sup>+</sup>, 443

[α]<sup>23.6</sup><sub>D</sub> = –14.5° (c = 1.0, CHCl<sub>3</sub>)

Enantiomeric excess (90% ee) was measured by HPLC (Chiralcel IA, 10% EtOH/Hexanes, 1.1 mL/min, Rt<sub>1</sub> = 16.4, Rt<sub>2</sub> = 21.3

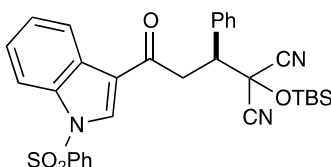

**(S)-2-(3-(1-benzenesulfonyl-indol-3-yl)-3-oxo-1-phenylpropyl)-2-((tert-butyl)dimethylsilyloxy)malononitrile (**5i**)**: Prepared according to general procedure using enone **1i** (140 mg, 0.36 mmol), MAC **4** (59 mg, 0.30 mmol), and catalyst **VIc** (7.1 mg, 0.015 mmol) in CH<sub>2</sub>Cl<sub>2</sub> (0.6 mL) at 0 °C for 72 h. Purified by flash column chromatography (SiO<sub>2</sub>, 20% EtOAc/Hexanes) to afford 156 mg (90%) of **5i** as a colorless oil.

Analytical data for **5i**:

**IR** (film): 3129, 3063, 3035, 2955, 2932, 2886, 2860, 1670, 1539, 1479, 1472, 1448, 1386, 1338, 1291, 1265, 1189, 1169, 1138, 1109, 1088, 1003, 989, 844, 788, 769, 751, 730, 700, 684, 593, 583, 571, 551

**<sup>1</sup>H NMR** (500 MHz; CDCl<sub>3</sub>) δ 8.31 (s, 1H), 8.22 (dt, *J* = 7.8, 1.0 Hz, 1H), 7.94 – 7.88 (m, 3H), 7.57 – 7.52 (m, 1H), 7.52 – 7.48 (m, 2H), 7.47 – 7.41 (m, 2H), 7.36 – 7.24 (m, 5H), 4.22 (dd, *J* = 9.2, 4.0 Hz, 1H), 3.74 (dd, *J* = 16.7, 9.2 Hz, 1H), 3.63 (dd, *J* = 16.7, 4.0 Hz, 1H), 0.87 (s, 9H), 0.29 (s, 3H), 0.27 (s, 3H).

**<sup>13</sup>C NMR** (125 MHz; CDCl<sub>3</sub>) δ 190.6, 137.4, 134.8, 134.7, 134.4, 131.8, 129.7 (x2), 129.6 (x2), 129.1, 128.8 (x2), 127.3, 127.1 (x2), 126.1, 125.0, 123.1, 121.0, 114.7, 114.6, 113.1, 67.9, 51.0, 39.7, 25.2 (x3), 18.1, –4.6, –4.7

**LRMS** (ES): Mass calcd for C<sub>32</sub>H<sub>33</sub>N<sub>3</sub>O<sub>4</sub>SSi [M+H]<sup>+</sup>, 584. Found [M+H]<sup>+</sup>, 584

[α]<sup>23.6</sup><sub>D</sub> = –12.8° (c = 1.0, CHCl<sub>3</sub>)

Enantiomeric excess (89% ee) was measured by HPLC (Chiralcel OD-H, 4% IPA/Hexanes, 1 mL/min, Rt<sub>1</sub> = 9.9, Rt<sub>2</sub> = 11.3

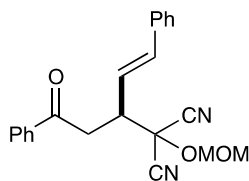

**(*S,E*)-2-(methoxymethoxy)-2-(5-oxo-1,5-diphenylpent-1-en-3-yl)malononitrile (3j):** Prepared according to general procedure using enone **1j** (84 mg, 0.36 mmol), MAC **2** (38 mg, 0.30 mmol), and catalyst **VIc** (7.1 mg, 0.015 mmol) in CH<sub>2</sub>Cl<sub>2</sub> (0.6 mL) at -10 °C for 28 h. Purified by flash column chromatography (SiO<sub>2</sub>, 15% EtOAc/Hexanes) to afford 107 mg (98%) of **3j** as a colorless oil.

Analytical data for **3j**:

**IR** (film): 3060, 3028, 2962, 2940, 2832, 1688, 1597, 1580, 1449, 1362, 1282, 1219, 1164, 1106, 1030, 970, 931, 753, 690

**<sup>1</sup>H NMR** (500 MHz; CDCl<sub>3</sub>) δ 7.99 – 7.92 (m, 2H), 7.61 – 7.55 (m, 1H), 7.47 (t, *J* = 7.8 Hz, 2H), 7.39 – 7.33 (m, 2H), 7.32 – 7.27 (m, 2H), 7.24 (t, *J* = 7.4 Hz, 1H), 6.83 (d, *J* = 15.7 Hz, 1H), 6.06 (dddd, *J* = 15.7, 9.0, 2.7, 1.3 Hz, 1H), 5.06 (s, 2H), 3.94 – 3.86 (m, 1H), 3.51 (s, 3H), 3.49 – 3.44 (m, 2H).

**<sup>13</sup>C NMR** (125 MHz; CDCl<sub>3</sub>) δ 195.3, 138.3, 136.4, 135.7, 133.7, 128.9 (x2), 128.7 (x2), 128.6, 128.2 (x2), 126.9 (x2), 121.5, 112.7, 112.5, 96.6, 69.4, 57.5, 47.6, 38.2

**LRMS** (ES): Mass calcd for C<sub>22</sub>H<sub>20</sub>N<sub>2</sub>O<sub>3</sub> [M+H]<sup>+</sup>, 361. Found [M+H]<sup>+</sup>, 361

[α]<sup>23.6</sup><sub>D</sub> = +14.3° (c = 1.0, CHCl<sub>3</sub>)

Enantiomeric excess (95% ee) was measured by HPLC (Chiralcel IA, 10% EtOH/Hexanes, 1 mL/min, Rt<sub>1</sub> = 8.4, Rt<sub>2</sub> = 10.4

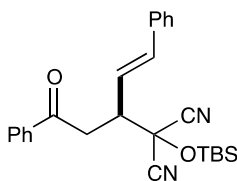

**(*S,E*)-2-((*tert*-butyldimethylsilyl)oxy)-2-(5-oxo-1,5-diphenylpent-1-en-3-yl)malononitrile (5j):** Prepared according to general procedure using enone **1j** (84 mg, 0.36 mmol), MAC **4** (59 mg, 0.30 mmol), and catalyst **VIc** (7.1 mg, 0.015 mmol) in CH<sub>2</sub>Cl<sub>2</sub> (0.6 mL) at 0 °C for 48 h. Purified by flash column chromatography (SiO<sub>2</sub>, % 5 Et<sub>2</sub>O/Hexanes) to afford 124 mg (96%) of **5j** as a colorless oil.

Analytical data for **5j**:

**IR** (film): 3028, 2931, 2860, 1690, 1598, 1559, 1496, 1472, 1449, 1363, 1261, 1218, 1135, 1003, 968, 843, 787, 750, 689

**<sup>1</sup>H NMR** (500 MHz; CDCl<sub>3</sub>) δ 7.95 (dd, *J* = 8.4, 1.3 Hz, 2H), 7.60 – 7.55 (m, 1H), 7.47 (dd, *J* = 8.4, 7.2 Hz, 2H), 7.36 – 7.33 (m, 2H), 7.31 – 7.26 (m, 2H), 7.26 – 7.22 (m, 1H), 6.80 (d, *J* = 15.7 Hz, 1H), 6.02 (dd, *J* = 15.7, 9.1 Hz, 1H), 3.80 (tdd, *J* = 9.0, 3.5, 0.8 Hz, 1H), 3.47 (dd, *J* = 16.9, 3.5 Hz, 1H), 3.40 (dd, *J* = 16.9, 9.1 Hz, 1H), 0.92 (s, 9H), 0.39 (s, 3H), 0.37 (s, 3H)

$^{13}\text{C}$  NMR (125 MHz;  $\text{CDCl}_3$ )  $\delta$  195.3, 138.4, 136.5, 135.8, 133.7, 128.9 (x2), 128.7 (x2), 128.5, 128.2 (x2), 126.9 (x2), 121.8, 114.7, 114.5, 67.4, 49.4, 38.0, 25.3 (x2), 18.2, -4.50 (x2)

LRMS (ES): Mass calcd for  $\text{C}_{26}\text{H}_{30}\text{N}_2\text{O}_2\text{Si}$   $[\text{M}+\text{H}]^+$ , 431. Found  $[\text{M}+\text{H}]^+$ , 431

$[\alpha]_D^{23.6} = +3.4^\circ$  ( $c = 1.0$ ,  $\text{CHCl}_3$ )

Enantiomeric excess (94% ee) was measured by HPLC (Chiralcel OD-H, 2% IPA/Hexanes, 1 mL/min,  $\text{Rt}_1 = 9.4$ ,  $\text{Rt}_2 = 15.0$ )

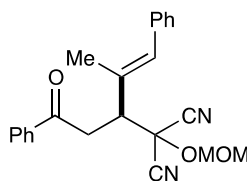

**(*S,E*)-2-(methoxymethoxy)-2-(2-methyl-5-oxo-1,5-diphenylpent-1-en-3-yl)malononitrile (3k):**

Prepared according to general procedure using enone **1k** (89 mg, 0.36 mmol), MAC **2** (38 mg, 0.30 mmol), and catalyst **VIc** (7.1 mg, 0.015 mmol) in  $\text{CH}_2\text{Cl}_2$  (0.6 mL) at 23 °C for 24 h. Purified by flash column chromatography ( $\text{SiO}_2$ , 15% EtOAc/Hexanes) to afford 110 mg (97%) of **3k** as a colorless oil.

Analytical data for **3k**:

IR (film): 3101, 3082, 3058, 3025, 2960, 2939, 2920, 2851, 2831, 1686, 1598, 1449, 1356, 1280, 1218, 1164, 1020, 924, 757, 690

$^1\text{H}$  NMR (500 MHz;  $\text{CDCl}_3$ )  $\delta$  7.98 (dd,  $J = 8.4, 1.4$  Hz, 2H), 7.63 – 7.56 (m, 1H), 7.49 (dd,  $J = 8.4, 7.1$  Hz, 2H), 7.34 – 7.27 (m, 2H), 7.24 – 7.16 (m, 3H), 6.75 (d,  $J = 1.6$  Hz, 1H), 5.10 (d,  $J = 7.2$  Hz, 1H), 5.07 (d,  $J = 7.2$  Hz, 1H), 3.78 – 3.69 (m, 2H), 3.53 (s, 3H), 3.48 (dd,  $J = 14.9, 1.3$  Hz, 1H), 2.09 (d,  $J = 1.5$  Hz, 3H)

$^{13}\text{C}$  NMR (125 MHz;  $\text{CDCl}_3$ )  $\delta$  195.7, 136.6, 136.4, 133.7, 132.6, 132.4, 129.0 (x2), 128.9 (x2), 128.2 (x2), 128.1 (x2), 127.1, 112.9, 112.8, 96.5, 69.4, 57.6, 51.8, 37.9, 18.6

LRMS (ES): Mass calcd for  $\text{C}_{23}\text{H}_{22}\text{N}_2\text{O}_3$   $[\text{M}+\text{Na}]^+$ , 397. Found  $[\text{M}+\text{H}]^+$ , 397

$[\alpha]_D^{23.6} = -25.4^\circ$  ( $c = 1.0$ ,  $\text{CHCl}_3$ )

Enantiomeric excess (88% ee) was measured by HPLC (Chiralcel OD-H, 7% IPA/Hexanes, 1 mL/min,  $\text{Rt}_1 = 8.3$ ,  $\text{Rt}_2 = 9.7$ )

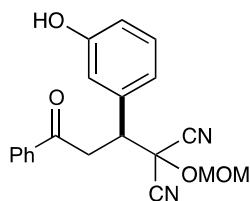**(S)-2-(1-(3-hydroxyphenyl)-3-oxo-3-phenylpropyl)-2-(methoxymethoxy)malononitrile (3l):**

Prepared according to general procedure using enone **1l** (81 mg, 0.36 mmol), MAC **2** (38 mg, 0.30 mmol), and catalyst **VIc** (7.1 mg, 0.015 mmol) in CH<sub>2</sub>Cl<sub>2</sub> (0.6 mL) at 23 °C for 24 h. Purified by flash column chromatography (SiO<sub>2</sub>, 25% EtOAc/Hexanes) to afford 99 mg (96%) of **3l** as a thick colorless oil.

Analytical data for **3l**:

**IR** (film): 3439, 3060, 2963, 2941, 2849, 2832, 1685, 1592, 1493, 1457, 1450, 1356, 1310, 1281, 1220, 1163, 1110, 1069, 1027, 1001, 974, 924, 899, 766, 738, 692

**<sup>1</sup>H NMR** (500 MHz; CDCl<sub>3</sub>) δ 7.98 – 7.89 (m, 2H), 7.62 – 7.54 (m, 1H), 7.45 (td, *J* = 8.0, 7.5, 1.6 Hz, 2H), 7.24 – 7.15 (m, 1H), 7.05 (dt, *J* = 7.8, 1.1 Hz, 1H), 7.01 (t, *J* = 2.1 Hz, 1H), 6.82 – 6.74 (m, 1H), 6.22 (s, 1H), 5.05 (d, *J* = 7.3 Hz, 1H), 5.02 (d, *J* = 7.2 Hz, 1H), 4.21 (dd, *J* = 9.5, 3.7 Hz, 1H), 3.84 (dd, *J* = 17.5, 9.5 Hz, 1H), 3.67 (dd, *J* = 17.4, 3.7 Hz, 1H), 3.46 (s, 3H)

**<sup>13</sup>C NMR** (125 MHz; CDCl<sub>3</sub>) δ 196.1, 156.1, 136.1, 135.8, 133.9, 130.1, 128.9 (x2), 128.2 (x2), 121.5, 116.8, 116.4, 112.7, 112.5, 96.6, 70.0, 57.5, 49.3, 38.7

**LRMS** (ES): Mass calcd for C<sub>20</sub>H<sub>18</sub>N<sub>2</sub>O<sub>4</sub> [2M+Na]<sup>+</sup>, 723. Found [M+H]<sup>+</sup>, 723

[α]<sub>D</sub><sup>23.6</sup> = -27.2° (c = 1.0, CHCl<sub>3</sub>)

Enantiomeric excess (92% ee) was measured by HPLC (Chiralcel IA, 10% EtOH/Hexanes, 1 mL/min, R<sub>t1</sub> = 16.6, R<sub>t2</sub> = 19.9

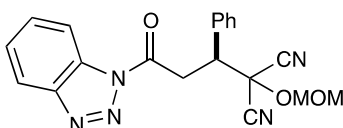

**(S)-2-(3-(1H-benzo[d][1,2,3]triazol-1-yl)-3-oxo-1-phenylpropyl)-2-(methoxymethoxy)malononitrile (3m):** Prepared according to general procedure with the addition of 50 mg of powdered 3 Å activated molecular sieves. Enone **1m** (90 mg, 0.36 mmol), MAC **2** (38 mg, 0.30 mmol), and catalyst **VIc** (7.1 mg, 0.015 mmol) in CH<sub>2</sub>Cl<sub>2</sub> (0.6 mL) at -10 °C for 72 h. Purified by flash column chromatography (SiO<sub>2</sub>, 15% EtOAc/Hexanes) to afford 110 mg (96%) of **3m** as a colorless solid.

Analytical data for **3m**:

**IR** (film): 3064, 3035, 3008, 2962, 2941, 2905, 2849, 2832, 1740, 1606, 1597, 1497, 1485, 1452, 1397, 1359, 1325, 309, 1232, 1217, 1166, 1111, 1066, 1031, 1004, 963, 927, 829, 783, 771, 752, 738, 705, 659, 619

**<sup>1</sup>H NMR** (500 MHz; CDCl<sub>3</sub>) δ 8.14 (dt, *J* = 8.3, 1.0 Hz, 1H), 8.10 (dt, *J* = 8.2, 1.0 Hz, 1H), 7.64 – 7.56



(m, 3H), 7.49 (ddd,  $J = 8.2, 7.1, 1.1$  Hz, 1H), 7.42 – 7.34 (m, 3H), 5.07 (d,  $J = 7.2$  Hz, 1H), 5.06 (d,  $J = 7.1$  Hz, 1H), 4.41 (dd,  $J = 17.0, 9.9$  Hz, 1H), 4.32 (dd,  $J = 9.9, 3.9$  Hz, 1H), 4.14 (dd,  $J = 17.0, 3.9$  Hz, 1H), 3.49 (s, 3H).

$^{13}\text{C}$  NMR (125 MHz;  $\text{CDCl}_3$ )  $\delta$  168.6, 146.3, 133.2, 130.9, 130.8, 129.7 (x3), 129.1 (x2), 126.6, 120.4, 114.3, 112.5, 112.0, 96.8, 69.8, 57.6, 49.9, 36.0

LRMS (ES): Mass calcd for  $\text{C}_{20}\text{H}_{17}\text{N}_5\text{O}_3$   $[\text{M}+\text{H}]^+$ , 376. Found  $[\text{M}+\text{H}]^+$ , 376

$[\alpha]_{\text{D}}^{23.6} = +8.2^\circ$  ( $c = 1.0, \text{CHCl}_3$ )

Enantiomeric excess (89% ee) was measured by HPLC (Chiralcel AD-H, 6% IPA/Hexanes, 1 mL/min,  $\text{Rt}_1 = 20.2, \text{Rt}_2 = 21.5$ )

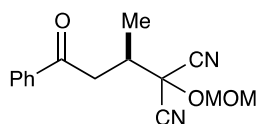

**(R)-2-(methoxymethoxy)-2-(4-oxo-4-phenylbutan-2-yl)malononitrile (3n)**: Prepared according to general procedure using enone **1n** (68 mg, 0.36 mmol), MAC **2** (38 mg, 0.30 mmol), and catalyst **VIc** (7.1 mg, 0.015 mmol) in  $\text{CH}_2\text{Cl}_2$  (0.6 mL) at  $-30^\circ\text{C}$  for 20 h. Purified by flash column chromatography ( $\text{SiO}_2$ , 10% EtOAc/Hexanes) to afford 77 mg (96%) of **3n** as a colorless oil.

Analytical data for **3n**:

IR (film): 3062, 2973, 2941, 2906, 2849, 2832, 1688, 1598, 1582, 1449, 1365, 1289, 1215, 1166, 1109, 1045, 1001, 967, 940, 755, 690

$^1\text{H}$  NMR (500 MHz;  $\text{CDCl}_3$ )  $\delta$  7.97 (dd,  $J = 8.3, 1.4$  Hz, 2H), 7.65 – 7.57 (m, 1H), 7.50 (dd,  $J = 8.3, 7.2$  Hz, 2H), 5.06 (s, 2H), 3.53 (s, 3H), 3.40 (dd,  $J = 16.3, 1.6$  Hz, 1H), 3.18 – 3.05 (m, 2H), 1.34 (d,  $J = 6.3$  Hz, 3H).

$^{13}\text{C}$  NMR (125 MHz;  $\text{CDCl}_3$ )  $\delta$  196.1, 136.5, 133.8, 128.9 (x2), 128.2 (x2), 112.9, 112.6, 96.6, 70.2, 57.6, 39.7, 39.3, 15.2.

HRMS (MM) Mass calcd for  $\text{C}_{15}\text{H}_{16}\text{N}_2\text{O}_3$   $[\text{M}+\text{H}]^+$ , 295.1161. Found  $[\text{M}+\text{H}]^+$ , 295.1051

$[\alpha]_{\text{D}}^{23.6} = +20^\circ$  ( $c = 0.5, \text{CHCl}_3$ )

Enantiomeric excess (96% ee) was measured by HPLC (Chiralcel AS-H, 2% IPA/Hexanes, 1 mL/min,  $\text{Rt}_1 = 10.1, \text{Rt}_2 = 10.96$ )

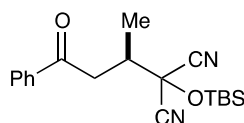

**(R)-2-((tert-butyl dimethylsilyl)oxy)-2-(4-oxo-4-phenylbutan-2-yl)malononitrile (5n)**: Prepared according to general procedure using enone **1n** (67 mg, 0.36 mmol), MAC **4** (59 mg, 0.30 mmol), and catalyst **VIc** (7.1 mg, 0.015 mmol) in  $\text{CH}_2\text{Cl}_2$  (0.6 mL) at  $-20^\circ\text{C}$  for 36 h. Purified by flash column chromatography ( $\text{SiO}_2$ , 5%  $\text{Et}_2\text{O}$ /Hexanes) to afford 100 mg (98%) of **5n** as a colorless oil.

Analytical data for **5n**:

**IR** (film): 3088, 3063, 3030, 2956, 2933, 2898, 2887, 2861, 1690, 1598, 1582, 1472, 1464, 1449, 1391, 1364, 1286, 1265, 1213, 1182, 1153, 1132, 1107, 1044, 1026, 1002, 961, 877, 843, 813, 787, 754, 686

**<sup>1</sup>H NMR** (500 MHz; CDCl<sub>3</sub>) δ 7.97 (dd, *J* = 8.4, 1.3 Hz, 2H), 7.64 – 7.58 (m, 1H), 7.50 (dd, *J* = 8.3, 7.2 Hz, 2H), 3.42 – 3.32 (m, 1H), 3.08 – 2.97 (m, 2H), 1.29 (s, 3H), 1.28 (s, 1H), 0.93 (s, 9H), 0.40 (s, 3H), 0.38 (s, 3H)

**<sup>13</sup>C NMR** (125 MHz; CDCl<sub>3</sub>) δ 196.2, 136.6, 133.8, 128.9 (x2), 128.2 (x2), 114.8, 114.6, 68.1, 41.0, 39.5, 25.3 (x3), 18.2, 14.9, -4.5 (x2)

**LRMS** (ES): Mass calcd for C<sub>19</sub>H<sub>26</sub>N<sub>2</sub>O<sub>2</sub>Si [M–CN]<sup>+</sup>, 316. Found [M+H]<sup>+</sup>, 316

[α]<sup>23.6</sup><sub>D</sub> = +23.6° (c = 1.0, CHCl<sub>3</sub>)

Enantiomeric excess (94% ee) was measured by HPLC (Chiralcel OD-H, 2% IPA/Hexanes, 1 mL/min, Rt<sub>1</sub> = 4.5, Rt<sub>2</sub> = 5.4

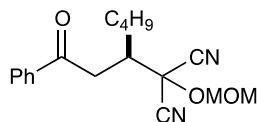

**(R)-2-(methoxymethoxy)-2-(1-oxo-1-phenylheptan-3-yl)malononitrile (3o)**: Prepared according to general procedure using enone **1o** (68 mg, 0.36 mmol), MAC **2** (38 mg, 0.30 mmol), and catalyst **VIc** (7.1 mg, 0.015 mmol) in CH<sub>2</sub>Cl<sub>2</sub> (0.6 mL) at –30 °C for 28 h. Purified by flash column chromatography (SiO<sub>2</sub>, 15% EtOAc/Hexanes) to afford 91 mg (96%) of **3o** as a colorless oil.

Analytical data for **3o**:

**IR** (film): 3062, 2959, 2936, 2872, 2832, 1690, 1653, 1598, 1581, 1466, 1449, 1419, 1363, 1319, 1280, 1220, 1165, 1108, 1067, 1031, 1002, 976, 932, 757, 690

**<sup>1</sup>H NMR** (500 MHz; CDCl<sub>3</sub>) δ 7.98 (dd, *J* = 8.3, 1.3 Hz, 2H), 7.63 – 7.58 (m, 1H), 7.50 (dd, *J* = 8.4, 7.1 Hz, 2H), 5.00–4.97 (m, 2H), 3.47 (s, 3H), 3.34 (dd, *J* = 17.5, 4.6 Hz, 1H), 3.21 (dddd, *J* = 9.7, 6.3, 4.6, 3.6 Hz, 1H), 3.08 (dd, *J* = 17.4, 6.2 Hz, 1H), 1.94 – 1.85 (m, 1H), 1.60 – 1.50 (m, 1H), 1.44 – 1.28 (m, 3H), 0.89 (t, *J* = 7.1 Hz, 3H)

**<sup>13</sup>C NMR** (125 MHz; CDCl<sub>3</sub>) δ 196.3, 136.5, 133.7, 128.9 (x2), 128.2 (x2), 113.2, 112.8, 96.4 (t, *J* = 2.0 Hz), 70.2, 57.5 (q, *J* = 1.7 Hz), 43.2, 38.6, 30.6, 29.2, 22.7, 13.9

**LRMS** (ES): Mass calcd for C<sub>18</sub>H<sub>22</sub>N<sub>2</sub>O<sub>3</sub> [M+Na]<sup>+</sup>, 337. Found [M+Na]<sup>+</sup>, 337

[α]<sup>23.6</sup><sub>D</sub> = –19.1° (c = 1.0, CHCl<sub>3</sub>)

Enantiomeric excess (97% ee) was measured by HPLC (Chiralcel AS-H, 2% IPA/Hexanes, 1 mL/min, Rt<sub>1</sub> = 7.97, Rt<sub>2</sub> = 8.4

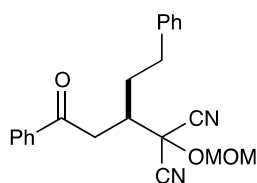

**(R)-2-(methoxymethoxy)-2-(1-oxo-1,5-diphenylpentan-3-yl)malononitrile (3p)**: Prepared according to general procedure using enone **1p** (85 mg, 0.36 mmol), MAC **2** (38 mg, 0.30 mmol), and catalyst **VIc** (7.1 mg, 0.015 mmol) in CH<sub>2</sub>Cl<sub>2</sub> (0.6 mL) at -30 °C for 24 h. Purified by flash column chromatography (SiO<sub>2</sub>, 15% EtOAc/Hexanes) to afford 107 mg (98%) of **3p** as a colorless oil.

Analytical data for **3p**:

**IR** (film): 3086, 3062, 3028, 3004, 2938, 2865, 2832, 1689, 1598, 1582, 1497, 1449, 1418, 1362, 1281, 1218, 1164, 1105, 1091, 1076, 1033, 1002, 924, 755, 700, 691

**<sup>1</sup>H NMR** (500 MHz; CDCl<sub>3</sub>) δ 8.04 – 7.97 (m, 2H), 7.66 – 7.60 (m, 1H), 7.52 (t, *J* = 7.8 Hz, 2H), 7.30 (t, *J* = 7.5 Hz, 2H), 7.24 – 7.17 (m, 3H), 5.02 (t, *J* = 7.4 Hz, 1H), 5.01 (t, *J* = 7.4 Hz, 1H), 3.49 (s, 3H), 3.43 (dd, *J* = 17.4, 4.4 Hz, 1H), 3.34–3.29 (m, 1H), 3.20 (dd, *J* = 17.4, 6.5 Hz, 1H), 2.77 (t, *J* = 8.2 Hz, 2H), 2.30 – 2.18 (m, 1H), 1.96 – 1.84 (m, 1H)

**<sup>13</sup>C NMR** (125 MHz; CDCl<sub>3</sub>) δ 196.0, 140.5, 136.3, 133.7, 128.9 (x2), 128.6 (x2), 128.4 (x2), 128.2 (x2), 126.4, 113.0, 112.7, 96.4 (t, *J* = 1.6 Hz), 70.0, 57.5 (q, *J* = 1.5 Hz), 43.0, 38.7, 33.5, 32.8

**LRMS** (ES): Mass calcd for C<sub>22</sub>H<sub>22</sub>N<sub>2</sub>O<sub>3</sub> [M+H]<sup>+</sup>, 363. Found [M+H]<sup>+</sup>, 363

[α]<sub>D</sub><sup>23.6</sup> = -8.2° (c 0.33, CHCl<sub>3</sub>)

Enantiomeric excess (96% ee) was measured by HPLC (Chiralcel IA, 3% IPA/Hexanes, 1 mL/min, Rt<sub>1</sub> = 11.6, Rt<sub>2</sub> = 12.3

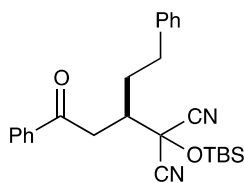

**(R)-2-((tert-butyl dimethylsilyl)oxy)-2-(1-oxo-1,5-diphenylpentan-3-yl)malononitrile (5p)**: Prepared according to general procedure using enone **1p** (85 mg, 0.36 mmol), MAC **4** (59 mg, 0.30 mmol), and catalyst **VIc** (7.1 mg, 0.015 mmol) in CH<sub>2</sub>Cl<sub>2</sub> (0.6 mL) at -20 °C for 36 h. Purified by flash column chromatography (SiO<sub>2</sub>, 5% Et<sub>2</sub>O/Hexanes) to afford 120 mg (92%) of **5p** as a colorless oil.

Analytical data for **5p**:

**IR** (film): 3087, 3063, 3028, 2954, 2932, 2898, 2887, 2861, 1690, 1598, 1582, 1497, 1472, 1464, 1449, 1363, 1265, 1217, 1134, 1003, 844, 787, 753, 698, 690

**<sup>1</sup>H NMR** (500 MHz; CDCl<sub>3</sub>) δ 8.02 (dd, *J* = 8.4, 1.4 Hz, 2H), 7.67 – 7.60 (m, 1H), 7.53 (t, *J* = 7.8 Hz, 2H), 7.33 – 7.26 (m, 2H), 7.25 – 7.16 (m, 3H), 3.44 (dd, *J* = 17.5, 4.1 Hz, 1H), 3.25 (ddt, *J* = 8.8, 7.6, 3.8 Hz, 1H), 3.15 (dd, *J* = 17.5, 6.7 Hz, 1H), 2.77 (t, *J* = 8.2 Hz, 3H), 2.26 – 2.15 (m, 1H), 1.91 – 1.79 (m, 1H), 0.91 (s, 9H), 0.42 (s, 3H), 0.35 (s, 3H)

$^{13}\text{C}$  NMR (125 MHz;  $\text{CDCl}_3$ )  $\delta$  195.9, 140.6, 136.3, 133.7, 128.9 (x2), 128.6 (x2), 128.4 (x2), 128.2 (x2), 126.4, 115.0, 114.7, 67.9, 44.4, 38.6, 33.6, 32.7, 25.3 (x3), 18.1, -4.52 (x2)

LRMS (ES): Mass calcd for  $\text{C}_{26}\text{H}_{32}\text{N}_2\text{O}_2\text{Si}$   $[\text{M}-\text{CN}]^+$ , 406. Found  $[\text{M}-\text{CN}]^+$ , 406

$[\alpha]^{23.6}_{\text{D}} = -7.2^\circ$  ( $c = 1.0$ ,  $\text{CHCl}_3$ )

Enantiomeric excess (94% ee) was measured by HPLC (Chiralcel OD-H, 2% IPA/Hexanes, 1 mL/min,  $\text{Rt}_1 = 9.4$ ,  $\text{Rt}_2 = 10.3$ )

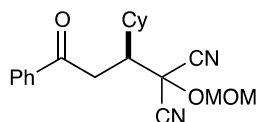

**(S)-2-(1-cyclohexyl-3-oxo-3-phenylpropyl)-2-(methoxymethoxy)malononitrile (3q):** Prepared according to general procedure using enone **1q** (77 mg, 0.36 mmol), MAC **2** (38 mg, 0.30 mmol), and catalyst **VIc** (7.1 mg, 0.015 mmol) in  $\text{CH}_2\text{Cl}_2$  (0.6 mL) at 23 °C for 24 h. Purified by flash column chromatography ( $\text{SiO}_2$ , 15% EtOAc/Hexanes) to afford 96 mg (94%) of **3q** as a colorless oil.

Analytical data for **3q**:

IR (film): 3061, 2930, 2854, 1690, 1598, 1581, 1449, 1380, 1276, 1221, 1181, 1106, 1076, 1017, 984, 929, 758, 690

$^1\text{H}$  NMR (500 MHz;  $\text{CDCl}_3$ )  $\delta$  7.99 (dd,  $J = 8.4, 1.4$  Hz, 2H), 7.64 – 7.58 (m, 1H), 7.50 (dd,  $J = 8.4, 7.0$  Hz, 2H), 4.99 (d,  $J = 7.2$  Hz, 1H), 4.96 (d,  $J = 7.2$  Hz, 1H), 3.46 (s, 3H), 3.29 – 3.21 (m, 2H), 3.20-3.17 (m, 1H), 1.99-1.92 (m, 2H), 1.81 – 1.72 (m, 3H), 1.70 – 1.62 (m, 1H), 1.38 – 1.22 (m, 2H), 1.22 – 1.01 (m, 3H)

$^{13}\text{C}$  NMR (125 MHz;  $\text{CDCl}_3$ )  $\delta$  196.5, 136.4, 133.6, 128.9 (x2), 128.2 (x2), 113.2, 113.2, 96.2, 69.4, 57.5 (m), 47.7, 39.0, 35.2, 32.6, 28.7, 26.6, 26.3, 26.0

LRMS (ES): Mass calcd for  $\text{C}_{20}\text{H}_{24}\text{N}_2\text{O}_3$   $[\text{M}+\text{Na}]^+$ , 363. Found  $[\text{M}+\text{Na}]^+$ , 363

$[\alpha]^{23.6}_{\text{D}} = -14.8^\circ$  ( $c = 1.0$ ,  $\text{CHCl}_3$ )

Enantiomeric excess (89% ee) was measured by HPLC (Chiralcel AD-H, 2% IPA/Hexanes, 1 mL/min,  $\text{Rt}_1 = 15.3$ ,  $\text{Rt}_2 = 16.3$ )

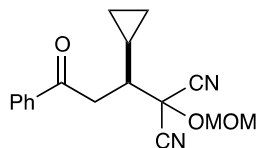

**(S)-2-(1-cyclopropyl-3-oxo-3-phenylpropyl)-2-(methoxymethoxy)malononitrile (3r):** Prepared according to general procedure using enone **1r** (62 mg, 0.36 mmol), MAC **2** (38 mg, 0.30 mmol), and catalyst **VIc** (7.1 mg, 0.015 mmol) in  $\text{CH}_2\text{Cl}_2$  (0.6 mL) at -30 °C for 24 h. Purified by flash column chromatography ( $\text{SiO}_2$ , 15% EtOAc/Hexanes) to afford 88 mg (98%) of **3r** as a colorless oil.

Analytical data for **3r**:

**IR** (film): 3087, 3067, 3009, 2962, 2940, 2849, 2832, 1688, 1597, 1581, 1449, 1361, 1276, 1216, 1165, 1109, 1096, 1028, 1002, 988, 964, 939, 923, 752, 690

**<sup>1</sup>H NMR** (500 MHz; CDCl<sub>3</sub>) δ 7.97 (dd, *J* = 8.0, 1.4 Hz, 2H), 7.63 – 7.57 (m, 1H), 7.50 (t, *J* = 7.7 Hz, 2H), 5.01 (dd, *J* = 7.2, 0.8 Hz, 1H), 4.98 (dd, *J* = 7.2, 0.8 Hz, 1H), 3.46 (d, *J* = 0.9 Hz, 3H), 3.41 (dd, *J* = 16.8, 4.6 Hz, 1H), 3.23 (dd, *J* = 16.7, 6.9 Hz, 1H), 2.55 (ddd, *J* = 9.9, 6.9, 4.6 Hz, 1H), 1.00 (dtt, *J* = 10.1, 8.0, 4.9 Hz, 1H), 0.87 – 0.79 (m, 1H), 0.79 – 0.71 (m, 1H), 0.58 – 0.48 (m, 1H), 0.36 (dddd, *J* = 9.5, 5.9, 4.8, 1.0 Hz, 1H)

**<sup>13</sup>C NMR** (125 MHz; CDCl<sub>3</sub>) δ 196.5, 136.7, 133.6, 128.9 (x2), 128.2 (x2), 113.2, 112.8, 96.3 (t, *J* = 1.4 Hz), 69.8, 57.5-57.4 (m), 48.0, 39.3, 12.6, 6.7, 3.2

**LRMS** (ES): Mass calcd for C<sub>17</sub>H<sub>18</sub>N<sub>2</sub>O<sub>3</sub> [M+H]<sup>+</sup>, 299. Found [M+H]<sup>+</sup>, 299

[α]<sub>D</sub><sup>23.6</sup> = +48.6° (c = 1.0, CHCl<sub>3</sub>)

Enantiomeric excess (97% ee) was measured by HPLC (Chiralcel AS-H, 3% IPA/Hexanes, 1 mL/min, Rt<sub>1</sub> = 9.3, Rt<sub>2</sub> = 10.9

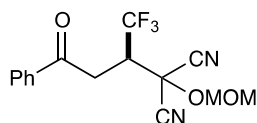

**(R)-2-(methoxymethoxy)-2-(1,1,1-trifluoro-4-oxo-4-phenylbutan-2-yl)malononitrile (3s)**: Prepared according to general procedure using enone **1s** (72 mg, 0.36 mmol), MAC **2** (38 mg, 0.30 mmol), and catalyst **VIc** (7.1 mg, 0.015 mmol) in CH<sub>2</sub>Cl<sub>2</sub> (0.6 mL) at –30 °C for 24 h. Purified by flash column chromatography (SiO<sub>2</sub>, 15% EtOAc/Hexanes) to afford 97 mg (99%) of **3s** as a colorless oil.

Analytical data for **3s**:

**IR** (film): 3064, 2947, 2851, 2835, 1694, 1598, 1582, 1450, 1380, 1359, 1380, 1276, 1185, 1168, 1139, 1107, 1092, 1043, 1023, 968, 924, 758, 741, 689

**<sup>1</sup>H NMR** (500 MHz; CDCl<sub>3</sub>) δ 8.00 (dt, *J* = 8.5, 1.4 Hz, 2H), 7.69 – 7.62 (m, 1H), 7.57 – 7.50 (m, 2H), 5.10 (d, *J* = 7.3 Hz, 1H), 5.08 (d, *J* = 7.2 Hz, 1H), 4.28 (qdd, *J* = 8.0, 6.1, 4.4 Hz, 1H), 3.56 (dd, *J* = 18.3, 6.1 Hz, 1H), 3.52 (s, 3H), 3.42 (ddd, *J* = 18.3, 4.4, 1.2 Hz, 1H)

**<sup>13</sup>C NMR** (125 MHz; CDCl<sub>3</sub>) δ 192.6, 135.3, 134.4, 129.1 (x2), 128.4 (x2), 125.2, 123.0, 111.3, 111.1, 96.8, 64.6, 57.8, 57.8, 46.8 (q, *J* = 28.1 Hz), 34.1 (q, *J* = 1.4 Hz)

**LRMS** (ES): Mass calcd for C<sub>15</sub>H<sub>13</sub>F<sub>3</sub>N<sub>2</sub>O<sub>3</sub> [M+H]<sup>+</sup>, 327. Found [M+H]<sup>+</sup>, 327

[α]<sub>D</sub><sup>23.6</sup> = +0.4° (c = 1.0, CHCl<sub>3</sub>)

Enantiomeric excess (94% ee) was measured by HPLC (Chiralcel AD-H, 4% IPA/Hexanes, 1 mL/min, Rt<sub>1</sub> = 7.9, Rt<sub>2</sub> = 8.6

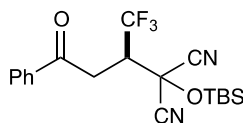

**(R)-2-((tert-butyldimethylsilyloxy)-2-(1,1,1-trifluoro-4-oxo-4-phenylbutan-2-yl)malononitrile (5s):** Prepared according to general procedure using enone **1s** (72 mg, 0.36 mmol), MAC **4** (59 mg, 0.30 mmol), and catalyst **VIc** (7.1 mg, 0.015 mmol) in CH<sub>2</sub>Cl<sub>2</sub> (0.6 mL) at -20 °C for 36 h. Purified by flash column chromatography (SiO<sub>2</sub>, 5% Et<sub>2</sub>O/Hexanes) to afford 110 mg (93%) of **5s** as a colorless oil.

Analytical data for **5s**:

**IR** (film): 2955, 2935, 2889, 2863, 1695, 1598, 1582, 1473, 1466, 1450, 1381, 1363, 1357, 1266, 1230, 1217, 1184, 1144, 1121, 1095, 1075, 1023, 1003, 958, 923

**<sup>1</sup>H NMR** (500 MHz; CDCl<sub>3</sub>) δ 8.00 (dt, *J* = 8.5, 1.6 Hz, 2H), 7.68 – 7.63 (m, 1H), 7.53 (tt, *J* = 7.4, 1.4 Hz, 2H), 4.19 (qdd, *J* = 8.1, 5.9, 4.3 Hz, 1H), 3.52 (dd, *J* = 18.5, 5.9 Hz, 1H), 3.36 (ddd, *J* = 18.5, 4.3, 1.2 Hz, 1H), 0.90 (s, 9H), 0.41 (s, 3H), 0.37 (s, 3H).

**<sup>13</sup>C NMR** (125 MHz, CDCl<sub>3</sub>) δ 192.6, 135.4, 134.4, 129.1 (x2), 128.4 (x2), 125.4, 123.2, 113.4 (x2), 48.0 (q, *J* = 27.6 Hz), 34.0 (d, *J* = 1.9 Hz), 25.1 (x3), 18.2, -4.6 (x2)

**LRMS** (ES): Mass calcd for C<sub>19</sub>H<sub>23</sub>F<sub>3</sub>N<sub>2</sub>O<sub>2</sub>Si [M-C<sub>18</sub>H<sub>15</sub>N<sub>2</sub>Si]<sup>+</sup>, 228. Found [M+H]<sup>+</sup>, 228

[α]<sub>D</sub><sup>23.6</sup> = +2.8° (c 0.5, CHCl<sub>3</sub>)

Enantiomeric excess (85% ee) was measured by HPLC (Chiralcel OD-H, 2% IPA/Hexanes, 1 mL/min, Rt<sub>1</sub> = 4.32, Rt<sub>2</sub> = 4.87

### Functionalization of **5a** (TBS MAC adducts)

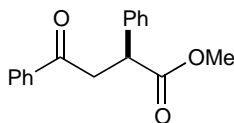

**(S)-methyl 4-oxo-2,4-diphenylbutanoate (7):** Adduct **5a** (66 mg, 0.163 mmol) was dissolved in 1.1 mL of THF. The reaction mixture was stirred at -30° C for 10 min before a 0.6 M solution of 3HF:Et<sub>3</sub>N (37.2 mg, 0.22 mmol, in 0.37 mL THF) was added dropwise at -30 °C. The clear reaction mixture was stirred for 2 h at -30 °C and then diluted with 1 mL of MeOH. The reaction mixture was then cooled to -40 °C, and methanolic Et<sub>3</sub>N (49.5 mg, 0.49 mmol, in 0.5 mL MeOH) was added dropwise. The reaction is stirred for an additional 45 min before allowing to warm to 0 °C. The reaction was then quenched with 2 ml 1 M HCl, extracted with Et<sub>2</sub>O (5 mL, 2x), dried over MgSO<sub>4</sub>, concentrated, and purified by flash column chromatography (SiO<sub>2</sub>, 15% EtOAc/Hexanes) to afford 41 mg of **7** (93% yield) as a colorless oil.

Analytical data for **7**:

**IR** (film): 3087, 3063, 2954, 2932, 2899, 2887, 2861, 1690, 1598, 1582, 1497, 1472, 1464, 1449, 1415, 1363, 1265, 1217, 1134, 1003, 844, 787, 753, 698, 690

**<sup>1</sup>H NMR** (500 MHz; CDCl<sub>3</sub>) δ 7.98 (dd, *J* = 8.4, 1.4 Hz, 1H), 7.60 – 7.54 (m, 1H), 7.48 – 7.43 (m, 1H),

7.39 – 7.33 (m, 2H), 7.33 – 7.27 (m, 1H), 4.31 (dd,  $J = 10.4, 4.0$  Hz, 1H), 3.96 (dd,  $J = 18.1, 10.4$  Hz, 1H), 3.70 (s, 2H), 3.28 (dd,  $J = 18.1, 4.0$  Hz, 1H)

$^{13}\text{C}$  NMR (125 MHz;  $\text{CDCl}_3$ )  $\delta$  197.7, 173.9, 138.5, 136.5, 133.4, 129.0 (x2), 128.7 (x2), 128.2 (x2), 127.9 (x2), 127.7, 52.4, 46.5, 42.9

LRMS (ES): Mass calcd for  $\text{C}_{17}\text{H}_{16}\text{O}_3$   $[\text{M}+\text{Na}]^+$ , 291. Found  $[\text{M}+\text{H}]^+$ , 291

$[\alpha]^{23.6}_{\text{D}} = +110.1$  ( $c = 1.0$ ,  $\text{CHCl}_3$ )

Enantiomeric excess (96% ee) was measured by HPLC (Chiralcel OD-H, 2% IPA/Hexanes, 1 mL/min,  $\text{Rt}_1 = 15.1$ ,  $\text{Rt}_2 = 15.9$ )

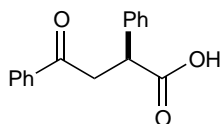

**(S)-4-oxo-2,4-diphenylbutanoic acid (8)**: In a one-dram vial equipped with a Teflon-coated magnetic stir bar, adduct **5a** (53 mg, 0.131 mmol) was dissolved in 5.24 ml of a 1:1:2 ( $\text{H}_2\text{O}$  (1.31 mL), THF (1.31 mL), AcOH (2.62 mL)). In a separate vial, TBAF (0.16 mmol, 0.16 mL, 1M THF) was dissolved in a mixture of 0.5 mL THF and 0.64 mL  $\text{H}_2\text{O}$ . The resulting solution of TBAF (now 0.1 M in 1:1 THF: $\text{H}_2\text{O}$ ) was added dropwise to the solution of TBS-MAC Enone. The reaction was allowed to stir for 24 h and diluted with 4 mL of  $\text{H}_2\text{O}$ . The reaction mixture was extracted with  $\text{Et}_2\text{O}$  (5 mL, 2x), dried over  $\text{MgSO}_4$ , and purified by flash column chromatography ( $\text{SiO}_2$ : 25% EtOAc/Hexanes, 1% AcOH) to afford 31 mg of acid **8** (94 % yield) as a white solid.

Analytical data for **8**:

IR (film): 2919, 1699, 1678, 1597, 1294, 1237, 1203, 757, 687

$^1\text{H}$  NMR (500 MHz;  $\text{CDCl}_3$ )  $\delta$   $^1\text{H}$  NMR (500 MHz,  $\text{CDCl}_3$ )  $\square = 7.96$  (dd,  $J = 1.1, 8.4$  Hz, 2 H), 7.61 - 7.48 (m, 1 H), 7.48 - 7.40 (m, 2 H), 7.40 - 7.26 (m, 5 H), 4.31 (dd,  $J = 4.3, 10.1$  Hz, 1 H), 3.89 (dd,  $J = 10.1, 18.0$  Hz, 1 H), 3.29 (dd,  $J = 4.3, 18.0$  Hz, 1 H)

$^{13}\text{C}$  NMR (125 MHz;  $\text{CDCl}_3$ )  $\delta$   $^{13}\text{C}$  NMR (125 MHz,  $\text{CDCl}_3$ )  $\square = 197.5, 179.2, 137.9, 136.5, 133.6, 129.2, 128.8, 128.3, 128.2, 128.0, 46.5, 42.5$

HRMS (MM) Mass calcd for  $\text{C}_{16}\text{H}_{14}\text{O}_3$   $[\text{M}-\text{H}_2\text{O}]^+$ , 236.0837. Found  $[\text{M}-\text{H}_2\text{O}]^+$ , 236.0815

$[\alpha]^{23.6}_{\text{D}} = +126^\circ$  ( $c = 1.0$ ,  $\text{CHCl}_3$ )

Enantiomeric excess (92% ee) was measured by HPLC (Chiralcel AD-H, 15% EtOH/Hexanes, 1.2 mL/min,  $\text{Rt}_1 = 15.9$ ,  $\text{Rt}_2 = 18.2$ )

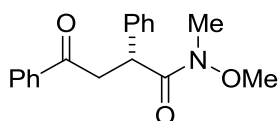

**(R)-N-methoxy-N-methyl-4-oxo-2,4-diphenylbutanamide (10):** Adduct **5a** (50 mg, 0.124 mmol) (note: opposite enantiomer used here) was dissolved in 0.93 mL of THF. The reaction mixture was stirred at  $-30^{\circ}\text{C}$  for 10 min before a 0.6 M solution of 3HF:Et<sub>3</sub>N (27 mg, 0.174 mmol, in 0.29 mL THF) was added dropwise at  $-30^{\circ}\text{C}$ . The clear reaction mixture was stirred for 2 h at  $-30^{\circ}\text{C}$ . The reaction mixture was then cooled to  $-40^{\circ}\text{C}$ . In a separate test tube, *N,O*-dimethylhydroxylamine hydrochloride (24 mg, 0.25 mmol,) is suspended in 1.5 mL CH<sub>2</sub>Cl<sub>2</sub> and treated with Et<sub>3</sub>N (31 mg, 0.31 mmol) and stirred at ambient temperature. Additional CH<sub>2</sub>Cl<sub>2</sub> (0.4 mL) was added until fully dissolved. (It is important that the hydroxylamine is fully in solution, to avoid racemization). The glycine solution was then added dropwise to the  $-40^{\circ}\text{C}$  reaction mixture. Additional Et<sub>3</sub>N (31 mg, 0.31 mmol) was then added and the reaction was stirred for an additional 60 min before warming to  $0^{\circ}\text{C}$ . The reaction was then quenched with 2 ml sat. NH<sub>4</sub>Cl, extracted with EtOAc (5 mL, 2x), dried over Na<sub>2</sub>SO<sub>4</sub>, concentrated, and purified by flash column chromatography (SiO<sub>2</sub>, 25% EtOAc/Hexanes) to afford 36 mg of **10** (98% yield) as a white solid.

Analytical data for **10**:

**IR** (film): 3061, 3029, 2970, 2938, 2908, 1684, 1656, 1598, 1581, 1495, 1449, 1419, 1387, 1359, 1336, 1248, 1205, 1179, 1009, 984, 756, 746, 700, 691

**<sup>1</sup>H NMR** (500 MHz; CDCl<sub>3</sub>)  $\delta$  7.98 (dd,  $J = 8.4, 1.4$  Hz, 2H), 7.56 – 7.51 (m, 1H), 7.43 (dd,  $J = 8.4, 7.1$  Hz, 2H), 7.41 – 7.37 (m, 2H), 7.33 (t,  $J = 7.6$  Hz, 2H), 7.28 – 7.24 (m, 1H), 4.80 – 4.68 (m, 1H), 4.09 (dd,  $J = 18.0, 10.7$  Hz, 1H), 3.67 (s, 3H), 3.19 (s, 3H), 3.14 (dd,  $J = 18.0, 3.5$  Hz, 1H)

**<sup>13</sup>C NMR** (125 MHz; CDCl<sub>3</sub>)  $\delta$  198.5, 173.5, 139.4, 136.7, 133.2, 128.9 (x2), 128.6 (x2), 128.2 (x2), 128.1 (x2), 127.3, 61.2, 43.4, 43.2, 32.4

**LRMS** (ES): Mass calcd for C<sub>18</sub>H<sub>19</sub>NO<sub>3</sub> [M+Na]<sup>+</sup>, 298. Found [M+Na]<sup>+</sup>, 320

**$[\alpha]_D^{23.6}$**  =  $-151.4^{\circ}$  ( $c = 1.0$ , CHCl<sub>3</sub>)

Enantiomeric excess (95% ee) was measured by HPLC (Chiralcel OD-H, 10% IPA/Hexanes, 1 mL/min, Rt<sub>1</sub> = 10.9, Rt<sub>2</sub> = 15.7

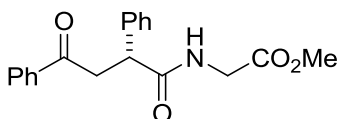

**(R)-methyl 2-(4-oxo-2,4-diphenylbutanamido)acetate (11):** Adduct **5a** (84 mg, 0.21 mmol) enone adduct (note: opposite enantiomer used) was dissolved in 1.56 mL of THF. The reaction mixture was stirred at  $-30^{\circ}\text{C}$  for 10 min before a 0.6 M solution of 3HF:Et<sub>3</sub>N (47 mg, 0.29 mmol, in 0.48 mL THF) was added dropwise at  $-30^{\circ}\text{C}$ . The clear reaction mixture was stirred for 2 h at  $-30^{\circ}\text{C}$ . The reaction mixture was then cooled to  $-40^{\circ}\text{C}$ . In a separate test tube, glycine hydrochloride (52 mg, 0.41 mmol,) is suspended in 2 mL CH<sub>2</sub>Cl<sub>2</sub> and treated with Et<sub>3</sub>N (53 mg, 0.52 mmol) and stirred at ambient temperature. Additional CH<sub>2</sub>Cl<sub>2</sub> (0.4 mL) was added until glycine was fully dissolved. (It is important that glycine is fully in solution, to avoid racemization) The glycine solution was then added dropwise to the  $-40^{\circ}\text{C}$  reaction mixture. Additional Et<sub>3</sub>N (53 mg, 0.52 mmol) was then added and the reaction was stirred for an additional 45 min before warming to  $0^{\circ}\text{C}$ . The reaction was then quenched with 2 ml 1 M HCl, extracted with EtOAc (5 mL, 2x), dried over Na<sub>2</sub>SO<sub>4</sub>, concentrated, and purified by flash column chromatography (SiO<sub>2</sub>, 25% EtOAc/Hexanes) to afford 63 mg of **11** (93% yield) as a white solid.



Analytical data for **11**:

**IR** (film): 3327, 3061, 3029, 3004, 2952, 1752, 1683, 1598, 1539, 1449, 1437, 1368, 1207, 1181, 992, 755, 699

**<sup>1</sup>H NMR** (500 MHz; CDCl<sub>3</sub>) δ 7.95 (d, *J* = 7.8 Hz, 2H), 7.60 – 7.48 (m, 1H), 7.48 – 7.37 (m, 4H), 7.37 – 7.30 (m, 2H), 7.26 (t, *J* = 6.8 Hz, 2H), 6.42 (s, 1H), 4.28 (dd, *J* = 9.0, 4.7 Hz, 1H), 4.06 (ddd, *J* = 18.0, 9.0, 1.5 Hz, 1H), 3.97 (dd, *J* = 5.4, 2.6 Hz, 2H), 3.66 (d, *J* = 3.0 Hz, 3H), 3.29 – 3.16 (m, 1H)

**<sup>13</sup>C NMR** (125 MHz; CDCl<sub>3</sub>) δ 198.1, 173.0, 170.2, 139.3, 136.6, 133.2, 128.98 (x2), 128.6 (x2), 128.2 (x2), 128.1 (x2), 127.6, 52.2, 47.5, 42.6, 41.6

**LRMS** (ES): Mass calcd for C<sub>19</sub>H<sub>19</sub>NO<sub>4</sub> [M+Na]<sup>+</sup>, 348. Found [M+H]<sup>+</sup>, 348

[α]<sup>23.6</sup><sub>D</sub> = -79.0° (c = 0.5, CHCl<sub>3</sub>)

Enantiomeric excess (95% ee) was measured by HPLC (Chiralcel IA, 20% EtOH/Hexanes, 1 mL/min, Rt<sub>1</sub> = 21.98, Rt<sub>2</sub> = 32.9

### Functionalization of **3a** (from MOM MAC)

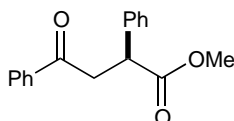

**(S)-methyl 4-oxo-2,4-diphenylbutanoate (7)**: To a 1-dram vial was added adduct **3a** (53 mg, 0.159 mmol), 1:1 AcOH/DME (318 mL, 0.5 M), and (*R*)-CSA (18 mg, 0.0795 mmol). The vial was capped and the reaction was heated to 60 °C. After 2 h the reaction was completed as determined by <sup>1</sup>H NMR. The reaction mixture was cooled to ambient temperature, diluted with anhydrous MeOH (318 uL), and cooled to -40 °C. 1:1 MeOH/Et<sub>3</sub>N (904 μL, 20.4 equiv. of Et<sub>3</sub>N) was added dropwise over 10 min. After 1 h, the reaction was warmed to 0 °C. After 30 min at 0 °C, the reaction was slowly quenched with sat. aq. NH<sub>4</sub>Cl. The mixture was extracted three times with CH<sub>2</sub>Cl<sub>2</sub> and the combined organics were dried over anh. Na<sub>2</sub>SO<sub>4</sub> and concentrated. Purified by flash column chromatography (SiO<sub>2</sub>, 20→30% EtOAc/Hexanes) to afford 40 mg (93%) of **7** as a colorless oil.

Analytical data for **7**:

**IR** (film): 3086, 3062, 3004, 2951, 2919, 2849, 1735, 1685, 1597, 1582, 1496, 1449, 1436, 1398, 1363, 1349, 1336, 1295, 1257, 1229, 1204, 1166, 1091, 1076, 1023, 1002, 965, 850, 756, 698, 692

**<sup>1</sup>H NMR** (500 MHz; CDCl<sub>3</sub>) δ 8.00 – 7.96 (m, 2H), 7.57 (ddt, *J* = 8.6, 6.9, 1.3 Hz, 1H), 7.46 (ddt, *J* = 7.9, 6.5, 1.2 Hz, 2H), 7.38 – 7.33 (m, 4H), 7.32 – 7.27 (m, 1H), 4.31 (dd, *J* = 10.3, 4.0 Hz, 1H), 3.96 (dd, *J* = 18.0, 10.4 Hz, 1H), 3.70 (s, 3H), 3.28 (dd, *J* = 18.0, 4.0 Hz, 1H).

**<sup>13</sup>C NMR** (125 MHz; CDCl<sub>3</sub>) δ 197.7, 174.0, 138.5, 136.5, 133.44, 129.0 (x2), 128.7 (x2), 128.2 (x2), 127.9 (x2), 127.7, 52.5, 46.47, 42.9

**LRMS** (ES): Mass calcd for C<sub>17</sub>H<sub>16</sub>O<sub>3</sub> [M+Na]<sup>+</sup>, 291. Found [M+H]<sup>+</sup>, 291

[α]<sup>23.6</sup><sub>D</sub> = +103.1° (c = 1.0, CHCl<sub>3</sub>)

Enantiomeric excess (96% ee) was measured by HPLC (Chiralcel OD-H, 2% IPA/Hexanes, 1 mL/min,  $R_{t1} = 24.7$ ,  $R_{t2} = 26.7$ )

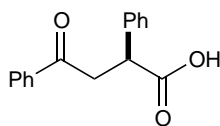

**(S)-4-oxo-2,4-diphenylbutanoic acid (8)**: To an oven-dried 2-dram vial was added MAC adduct **3a** (117 mg, 0.350 mmol), (*R*)-CSA (407 mg) and 1:1 AcOH/H<sub>2</sub>O (1.75 mL). The vial was sealed with a cap and heated to 60 °C. After 15 h the reaction was completed as judged by <sup>1</sup>H NMR. The reaction mixture was cooled to ambient temperature, at which point white solid started to crash out. The mixture was extracted three times with CH<sub>2</sub>Cl<sub>2</sub> and dried over anh. Na<sub>2</sub>SO<sub>4</sub>. Purified by flash column chromatography (SiO<sub>2</sub>, 50% EtOAc/Hexanes) to afford an off-white solid (84 mg, 94%).

Analytical data for **8** is the same as the acid derived from TBS MAC adduct (**5a**).

$[\alpha]_D^{23.6} = +131^\circ$  ( $c = 1.0$ , CHCl<sub>3</sub>)

Enantiomeric excess (94% ee) was measured by HPLC (Chiralcel AD-H, 15% EtOH/Hexanes, 1.2 mL/min,  $R_{t1} = 16.5$ ,  $R_{t2} = 18.0$ )

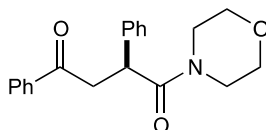

**(S)-1-morpholino-2,4-diphenylbutane-1,4-dione (9)**: To a 1-dram vial was added adduct **3a** (56 mg, 0.167 mmol), (*R*)-CSA (78 mg, 0.334 mmol), AcOH (19 uL, 0.334 mmol), and DME (334 uL). The vial was capped and the reaction was heated to 70 °C. After 2 h the conversion to cyanohydrin was completed as determined by <sup>1</sup>H NMR. The reaction mixture was cooled to ambient temperature, diluted with DME (1 mL), and cooled to -45 °C. 1:1 Morpholine/DME (74 uL, 2.5 equiv. of morpholine) was added dropwise over 1 min, then 1:1 Et<sub>3</sub>N/DME (350 uL, 7.5 equiv. of Et<sub>3</sub>N) was added dropwise over 7 min. After 10 min, the reaction was warmed to 0 °C. After 30 min at 0 °C, the reaction was slowly quenched with sat. aq. NH<sub>4</sub>Cl. The mixture was extracted three times with CH<sub>2</sub>Cl<sub>2</sub>, and the combined organics were dried over anh. Na<sub>2</sub>SO<sub>4</sub> and concentrated. Purified by flash column chromatography (SiO<sub>2</sub>, 30% EtOAc/Hexanes) to afford 47 mg (94%) of **9** as an off-white residue which, over the course of two weeks, crystallized into an off-white solid.

Analytical data for **9**:

**IR** (film): 3060, 3027, 2962, 2919, 2855, 1684, 1645, 1457, 1449, 1436, 1360, 1269, 1234, 1205, 1179, 1114, 1030, 756, 702, 691

**<sup>1</sup>H NMR** (500 MHz; CDCl<sub>3</sub>)  $\delta$  7.98 (dd,  $J = 8.4, 1.3$  Hz, 2H), 7.54 (ddt,  $J = 7.9, 6.9, 1.3$  Hz, 1H), 7.46 – 7.41 (m, 2H), 7.38 – 7.26 (m, 5H), 4.53 (dd,  $J = 9.9, 3.6$  Hz, 1H), 4.14 (dd,  $J = 17.8, 9.9$  Hz, 1H), 3.76 – 3.49 (m, 6H), 3.44 – 3.38 (m, 1H), 3.19 – 3.13 (m, 1H), 3.07 (dd,  $J = 17.8, 3.7$  Hz, 1H)

**<sup>13</sup>C NMR** (125 MHz; CDCl<sub>3</sub>)  $\delta$  198.6, 170.9, 139.4, 136.7, 133.3, 129.3 (x2), 128.6 (x2), 128.3 (x2), 127.8 (x2), 127.5, 66.9, 66.4, 46.3, 44.3, 44.2, 42.8

**LRMS (ES):** Mass calcd for C<sub>20</sub>H<sub>21</sub>NO<sub>3</sub> [M+Na]<sup>+</sup>, 346. Found [M+H]<sup>+</sup>, 346

$[\alpha]_D^{23.6} = +124.9^\circ$  (c = 1.0, CHCl<sub>3</sub>)

Enantiomeric excess (94% ee) was measured by HPLC (Chiralcel OD-H, 10% IPA/Hexanes, 1 mL/min, Rt<sub>1</sub> = 16.4, Rt<sub>2</sub> = 18.7

### Determination of absolute configuration

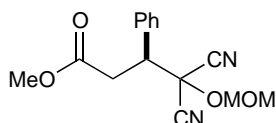

**(S)-methyl 4,4-dicyano-4-(methoxymethoxy)-3-phenylbutanoate (12):** To a 16 x 125 mm test tube was added CH<sub>2</sub>Cl<sub>2</sub> (1.2 mL), enone **1m** (180 mg, 0.722 mmol), MAC **2** (76 mg, 0.60 mmol) and 120 mg of activated powdered 3 Å molecular sieves. The test tube was sealed with a rubber septum, purged with N<sub>2</sub>, and was placed in a -10 °C bath for 10 min before catalyst **VIc** (14.2 mg, 0.03 mmol) was added as a solid. The reaction was resealed and stirred at -10 °C for 72 h and then diluted with 0.6 mL of MeOH. The reaction was then treated with methanolic Et<sub>3</sub>N (60.7 mg, 0.6 mmol in 0.4 mL of MeOH). The reaction was warmed up to 0 °C and stirred for an additional 30 min. The reaction was quenched with 5 mL aq HCl (1M), and extracted with CH<sub>2</sub>Cl<sub>2</sub> (5 mL, 2x), dried over Na<sub>2</sub>SO<sub>4</sub>, concentrated and purified by flash column chromatography (SiO<sub>2</sub>: 10% EtOAc/Hexanes) to afford 160 mg of **12** (93%) as a clear oil.

Analytical data for **12**:

**IR** (film): 3066, 3035, 3006, 2955, 2905, 2849, 2833, 1741, 1498, 1456, 1438, 1373, 1348, 1295, 1267, 1218, 1165, 1111, 1072, 1030, 971, 928, 896, 794, 774, 743, 702

**<sup>1</sup>H NMR** (500 MHz; CDCl<sub>3</sub>) δ 7.47 – 7.42 (m, 2H), 7.41-7.35 (m, 3H), 5.04 (d, J = 7.2 Hz, 1H), 5.02 (d, J = 7.3 Hz, 1H), 3.95 (dd, J = 9.9, 4.8 Hz, 1H), 3.58 (s, 3H), 3.46 (s, 3H), 3.16 (dd, J = 16.2, 4.8 Hz, 1H), 3.07 (dd, J = 16.2, 9.9 Hz, 1H)

**<sup>13</sup>C NMR** (125 MHz; CDCl<sub>3</sub>) δ 170.2, 133.5, 129.5 (x2), 129.4, 128.9 (x2), 112.5, 112.1, 96.6, 69.7, 57.4, 52.2, 50.3, 34.7

**HRMS** (MM) Mass calcd for C<sub>15</sub>H<sub>16</sub>N<sub>2</sub>O<sub>4</sub> [M]<sup>-</sup> 288.111, Found [M+Na]<sup>-</sup> 288.1122

$[\alpha]_D^{23.6} = +25.5^\circ$  (c = 1.0, CHCl<sub>3</sub>)

Enantiomeric excess (88% ee) was measured by HPLC (Chiralcel AD-H, 7% IPA/Hexanes, 1 mL/min, Rt<sub>1</sub> = 7.0, Rt<sub>2</sub> = 7.8

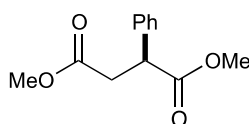

**(S)-dimethyl 2-phenylsuccinate (13)**: To a 1-dram vial was added **12** (60 mg, 0.208 mmol), 1:1 AcOH/MeOH (0.42 mL, 0.5 M), and (*R*)-CSA (24 mg, 0.104 mmol). The vial was capped and the reaction was heated to 60 °C. After 3 h, the reaction was completed as determined by <sup>1</sup>H NMR. The reaction mixture was cooled to ambient temperature, diluted with MeOH (1 mL), and cooled to -40 °C. A 1:1 MeOH/Et<sub>3</sub>N (404 mg, 4.0 mmol, 19.3 equiv. of Et<sub>3</sub>N, in 0.56 mL MeOH) was added dropwise over 10 minutes. After 1 h, the reaction was warmed to 0 °C. After 30 min at 0 °C, the reaction was slowly quenched with 5 mL HCl (1M). The mixture was extracted three times with Et<sub>2</sub>O and the combined organics were dried over anh. MgSO<sub>4</sub>, concentrated, and purified by flash column chromatography (SiO<sub>2</sub>, 7% EtOAc/Hexanes) to afford 37 mg (80%) of **13** as a colorless oil.

Analytical data for **13**:

**IR** (film): 3088, 3064, 3031, 3004, 2953, 2848, 1734, 1700, 1684, 1653, 1559, 1497, 1456, 1437, 1338, 1296, 1252, 1231, 1197, 1161, 1094, 1073, 1006, 967, 858, 844, 778, 733, 698, 668

**<sup>1</sup>H NMR** (500 MHz; CDCl<sub>3</sub>) δ 7.36 – 7.30 (m, 2H), 7.30 – 7.25 (m, 3H), 4.09 (dd, *J* = 10.1, 5.2 Hz, 1H), 3.67 (s, 3H), 3.67 (s, 3H), 3.21 (dd, *J* = 17.0, 10.1 Hz, 1H), 2.67 (dd, *J* = 17.0, 5.2 Hz, 1H)

**<sup>13</sup>C NMR** (125 MHz; CDCl<sub>3</sub>) δ 173.5, 172.1, 137.8, 129.0 (x2), 127.8 (x3), 52.5, 52.0, 47.2, 37.7

**[α]<sup>23.6</sup><sub>D</sub>** = +102 °C (*c* = 0.5, MeOH) (lit. **[α]<sup>20</sup><sub>D</sub>** = +124 (*c* 0.5, MeOH))<sup>12</sup>

Enantiomeric excess (87% ee) was measured by HPLC (Chiralcel IA, 1% IPA/Hexanes, 1 mL/min, Rt<sub>1</sub> = 15.7, Rt<sub>2</sub> = 19.4

### Total Synthesis of Fornicin C

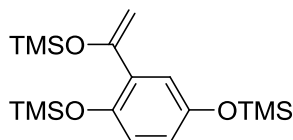

**(2-(1-(trimethylsilyloxy)vinyl)-1,4-phenylene)bis(oxy)bis(trimethylsilane) (15)**: In a 50-mL round bottom flask equipped with a stir bar was added 2,5-dihydroxyacetophenone (365 mg, 2.4 mmol) and 20 mL of CH<sub>2</sub>Cl<sub>2</sub>. The reaction mixture was sealed with a rubber septum, purged with N<sub>2</sub>, and placed in a -30° bath for 10 min. Et<sub>3</sub>N (1.67 mL, 12 mmol) was added dropwise, turning the suspension to a yellow solution. TMSOTf (1.74 mL, 9.6 mmol) was then added dropwise via syringe. During the addition, the yellow reaction becomes clear. The reaction was allowed to warm up to -10 °C and stirred for an additional 30 min. The reaction was quenched with 4 mL of sat. aq. NaHCO<sub>3</sub>, and stirred for an additional 5 min. The reaction mixture was transferred to a separatory funnel and washed with additional sat. aq. NaHCO<sub>3</sub> (2x, 10 mL), and brine (10 mL, 1x). The resulting organic phase was dried over Na<sub>2</sub>SO<sub>4</sub>, concentrated, and dried for 30 min in vacuum to afford silyl enol ether **15** (876 mg, 99%) which was used directly in the next step.

<sup>12</sup> Bettoni, G.; Cellucci, C.; Tortorella, V. *J. Heterocycl. Chem.* **1976**, 1053.

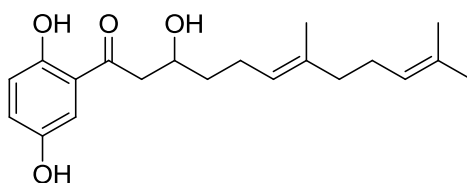

**(E)-1-(2,5-dihydroxyphenyl)-3-hydroxy-7,11-dimethyldodeca-6,10-dien-1-one (17):** In a 50-mL round bottom flask, **15** (876 mg, 2.4 mmol) was dissolved in 20 mL of CH<sub>2</sub>Cl<sub>2</sub>. Aldehyde **16**<sup>8,9</sup> (360 mg, 2 mmol), was added and the reaction was placed in a -78 °C bath. After stirring for 20 min, BF<sub>3</sub>OEt<sub>2</sub> (0.37 mL, 3 mmol) was added dropwise over 5 min resulting in a bright yellow solution. The reaction was stirred for 1 h and then quenched slowly with Et<sub>3</sub>N (0.56 mL, 4 mmol). Then sat. aq. NaHCO<sub>3</sub> (4 mL) was added and the reaction was allowed to warm to ambient temperature. The reaction mixture was transferred to a separatory funnel, and was diluted with 10 mL NaHCO<sub>3</sub> and 10 mL brine. The reaction mixture was extracted with CH<sub>2</sub>Cl<sub>2</sub> (10 mL, 2x), concentrated on a rotary evaporator, redissolved in 10 mL of 4:1:1 THF:H<sub>2</sub>O:AcOH and stirred for 20 min. The reaction was then diluted with 20 mL of CH<sub>2</sub>Cl<sub>2</sub> and quenched slowly with 15 mL sat. aq. NaHCO<sub>3</sub>. The mixture was extracted with CH<sub>2</sub>Cl<sub>2</sub> (10 mL, 2x), dried over Na<sub>2</sub>SO<sub>4</sub>, concentrated and purified by column chromatography (SiO<sub>2</sub>, 20% EtOAc/Hexanes) to afford 606 mg (90%) of **17** as a dark yellow oil.

Analytical data for **17**:

**IR** (film): 3357, 2924, 1644, 1621, 1485, 1445, 1376, 1267, 1174, 1062, 999, 826, 792, 739, 684

**<sup>1</sup>H NMR** (500 MHz; CDCl<sub>3</sub>) δ 1.48 - 1.72 (m, 11 H) 1.93 - 2.02 (m, 2 H) 2.02 - 2.10 (m, 2 H) 2.10 - 2.22 (m, 2 H) 2.98 - 3.11 (m, 2 H) 3.50 (br. s., 1 H) 4.22 - 4.32 (m, 1 H) 5.03 - 5.17 (m, 2 H) 6.62 (br. s., 1 H) 6.82 (d, *J*=8.85 Hz, 1 H) 7.00 (dd, *J*=8.85, 3.05 Hz, 1 H) 7.10 (d, *J*=3.05 Hz, 1 H) 11.67 (s, 1 H)

**<sup>13</sup>C NMR** (125 MHz; CDCl<sub>3</sub>) δ = 205.8, 156.5, 148.1, 136.5, 131.7, 125.8, 124.4, 123.4, 119.5, 119.3, 115.0, 67.9, 44.9, 39.9, 36.6, 26.8, 25.9, 24.2, 17.9, 16.2

**HRMS** (MM) Mass calcd for C<sub>20</sub>H<sub>28</sub>O<sub>4</sub> [M], 332.1988. Found [M]<sup>-</sup>, 332.1936

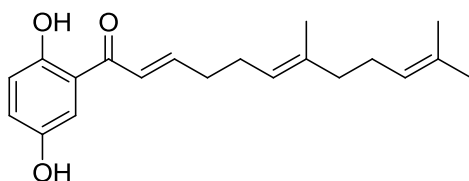

**(2E,6E)-1-(2,5-dihydroxyphenyl)-7,11-dimethyldodeca-2,6,10-trien-1-one (18):** **17** (70 mg, 0.23 mmol) was dissolved in 2 mL DMF. Sulfur trioxide pyridine complex (47 mg, 0.32 mmol) was dissolved in 1 mL of DMF, and added dropwise over 1.5 h via syringe pump. After an additional 1.5 h, <sup>1</sup>H NMR showed complete consumption of starting material to the sulfonated products. The reaction is placed in a 40 °C oil bath, and allowed to stir for 24 h. The light yellow solution turns dark yellow as the enone forms. The reaction is then diluted with 4 mL of H<sub>2</sub>O, 3 mL of 1M HCl, extracted with Et<sub>2</sub>O (5 mL, 3x), dried over MgSO<sub>4</sub>, concentrated and purified by flash column chromatography (SiO<sub>2</sub>, 10% EtOAc/Hexanes) to afford 47 mg (71%) of **18** as a dark yellow oil.

Analytical data for **18**:

**IR** (film): 3395, 2966, 2922, 2855, 1650, 1591, 1468, 1436, 1385, 1353, 1272, 1185, 831, 786

**<sup>1</sup>H NMR** (500 MHz, CDCl<sub>3</sub>)  $\delta$  = 12.42 - 12.31 (m, 1 H), 7.31 - 7.23 (m, 1 H), 7.23 - 7.1 (m, 1 H), 7.04 (d,  $J$  = 7.0 Hz, 1 H), 6.93 (d,  $J$  = 15.3 Hz, 1 H), 6.89 (d,  $J$  = 8.5 Hz, 1 H), 5.74 - 5.53 (m, 1 H), 5.14 (t,  $J$  = 6.9 Hz, 1 H), 5.08 (t,  $J$  = 6.7 Hz, 1 H), 2.36 (q,  $J$  = 6.8 Hz, 2 H), 2.21 (q,  $J$  = 7.0 Hz, 2 H), 2.11 - 2.03 (m, 2 H), 2.03 - 1.95 (m, 2 H), 1.67 (s, 3 H), 1.64 - 1.56 (m, 6 H)

**<sup>13</sup>C NMR** (125 MHz, CDCl<sub>3</sub>)  $\delta$  = 194.1, 157.6, 151.2, 147.9, 136.9, 131.7, 125.1, 124.3, 124.1, 122.7, 119.5, 119.4, 115.1, 39.8, 33.4, 26.8, 26.7, 25.8, 17.9, 16.3

**HRMS** (MM) Mass calcd for C<sub>20</sub>H<sub>26</sub>NO<sub>3</sub> [M<sup>-</sup>], 314.1882. Found [M<sup>-</sup>], 314.1867

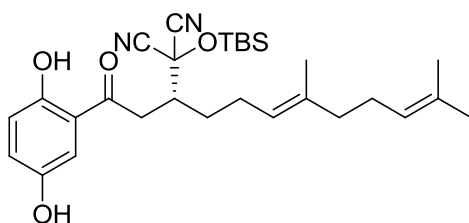

**(E)-2-(tert-butyldimethylsilyloxy)-2-(1-(2,5-dihydroxyphenyl)-7,11-dimethyl-1-oxododeca-6,10-dien-3-yl)malononitrile (19)**: Enone **18** (103 mg, 0.327 mmol) and MAC **4** (54 mg, 0.27 mmol) was dissolved in CH<sub>2</sub>Cl<sub>2</sub> (0.6 mL). The reaction mixture was degassed 3x using freeze-pump-thaw method. The reaction was then sealed under N<sub>2</sub> and placed in a 0 °C bath. Catalyst **VIc** (6.4 mg, 0.014 mmol) was added as a solid to the reaction mixture. The reaction was stirred at 0 °C for 24 h. The reaction was then warmed to 10 °C for another 24 h. Finally, the reaction was warmed to ambient temperature and stirred for an additional 24h. The reaction was then quenched with 1 mL aq. HCl, and extracted with CH<sub>2</sub>Cl<sub>2</sub>, dried over Na<sub>2</sub>SO<sub>4</sub>, concentrated and purified by flash column chromatography (SiO<sub>2</sub>, 10% EtOAc/Hexanes) to afford 145 mg (87%) of **19** as an orange oil.

Analytical data for **19**:

**IR** (film): 3421, 2931, 2860, 1647, 1484, 1441, 1295, 1261, 1180, 1133, 842, 787

**<sup>1</sup>H NMR** (500 MHz, CDCl<sub>3</sub>)  $\delta$  = 11.71 (d,  $J$  = 1.5 Hz, 1 H), 7.21 (d,  $J$  = 2.7 Hz, 1 H), 7.06 (dd,  $J$  = 3.1, 8.9 Hz, 1 H), 6.90 (d,  $J$  = 9.2 Hz, 1 H), 5.30 (br. s., 1 H), 5.13 - 5.01 (m, 2 H), 3.30 (dd,  $J$  = 4.9, 17.7 Hz, 1 H), 3.17 - 3.07 (m, 1 H), 3.00 (dd,  $J$  = 5.8, 17.4 Hz, 1 H), 2.17 - 2.01 (m, 4 H), 2.00 - 1.92 (m, 2 H), 1.92 - 1.83 (m, 1 H), 1.73 - 1.64 (m, 3 H), 1.59 (s, 3 H), 1.54 (s, 4 H), 0.93 - 0.80 (m, 9 H), 0.38 (s, 3 H), 0.29 (s, 3 H)

**<sup>13</sup>C NMR** (125 MHz, CDCl<sub>3</sub>)  $\delta$  = 201.6, 156.9, 148.0, 137.5, 131.7, 125.7, 124.3, 124.3, 122.3, 119.8, 118.8, 115.1, 114.8, 114.4, 68.1, 44.2, 39.8, 38.0, 30.7, 26.7, 25.9, 25.6, 25.3, 18.2, 17.9, 16.3, -4.4, -4.5

**HRMS** (MM) Mass calcd for C<sub>29</sub>H<sub>42</sub>N<sub>2</sub>O<sub>4</sub>Si [M+Na]<sup>+</sup>, 533.2812 Found [M+Na]<sup>+</sup>, 533.281

$[\alpha]_D^{23.6}$  = -18° (c = 0.5, CHCl<sub>3</sub>)

Enantiomeric excess (92% ee) was measured by HPLC (Chiralcel AD-H, 2% IPA/Hexanes, 1 mL/min, Rt<sub>1</sub> = 15.5, Rt<sub>2</sub> = 21.8

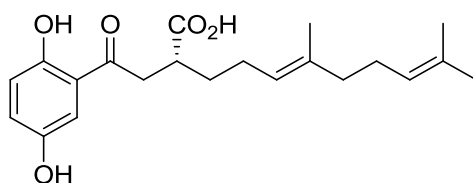

**Fornicin C (20):** MAC adduct **19** (47 mg, 0.092 mmol) was dissolved in 0.37 mL of 1:1:2 H<sub>2</sub>O (0.92 mL):THF(0.92 mL):AcOH(1.84 mL). TBAF (0.11 mL, 1M THF), was dissolved in 0.4 mL THF, and 0.5 mL H<sub>2</sub>O. The solution of TBAF (now 0.1 M in 1:1 THF:H<sub>2</sub>O) was added dropwise to the solution of TBS adduct **19**. The reaction was allowed to stir for 24 h. The reaction mixture was diluted with 4 mL of H<sub>2</sub>O, extracted with Et<sub>2</sub>O (5 mL, 2x), dried over anh. MgSO<sub>4</sub>, and purified by flash column chromatography (SiO<sub>2</sub>: 20% EtOAc/Hexanes, 1% AcOH) to afford 30 mg of fornicin C (**20**) (91 % yield) as a light yellow solid.

Analytical data for **20**:

**IR** (film): 3357, 2966, 2923, 1708, 1626, 1486, 1442, 1375, 1273, 1178, 792

**<sup>1</sup>H NMR** (500 MHz, d<sub>6</sub>-Acetone)  $\delta$  = 11.59 (br. s., 1 H), 7.48 - 7.34 (m, 1 H), 7.09 (dd,  $J$  = 3.1, 8.9 Hz, 1 H), 6.81 (d,  $J$  = 8.9 Hz, 1 H), 5.22 - 5.14 (m, 1 H), 5.14 - 5.06 (m, 1 H), 3.52 (dd,  $J$  = 9.5, 18.0 Hz, 1 H), 3.20 (dd,  $J$  = 4.3, 18.0 Hz, 1 H), 3.08 - 2.99 (m, 1 H), 2.21 - 2.12 (m, 2 H), 2.12 - 2.06 (m, 2 H), 2.02 - 1.95 (m, 2 H), 1.80 (tdd,  $J$  = 6.8, 8.8, 13.5 Hz, 1 H), 1.72 - 1.66 (m, 1 H), 1.65 - 1.61 (m, 6 H), 1.59 (s, 3 H)

**<sup>13</sup>C NMR** <sup>13</sup>C NMR (125 MHz, d<sub>6</sub>-Acetone)  $\delta$  = 205.7, 176.5, 156.5, 150.2, 136.5, 131.7, 125.7, 125.1, 124.4, 120.0, 119.5, 115.5, 40.5, 40.4, 40.1, 32.7, 27.3, 26.2, 25.8, 17.7, 16.1

**HRMS** (MM): Mass calcd for C<sub>21</sub>H<sub>28</sub>O<sub>5</sub> [M+Cl]<sup>-</sup>, 395.1625. Found [M+Cl]<sup>-</sup>, 395.1622

**$[\alpha]_D^{23.6}$**  = +18° (c = 0.5, MeOH)

Enantiomeric excess (92% ee) was measured by HPLC (Chiralcel AD-H, 10% IPA/Hexanes, 1 mL/min, Rt<sub>1</sub> = 15.8, Rt<sub>2</sub> = 23.9

Selected NMR Spectra

Catalyst VIc

KY, Cat, RR, So, Pvr

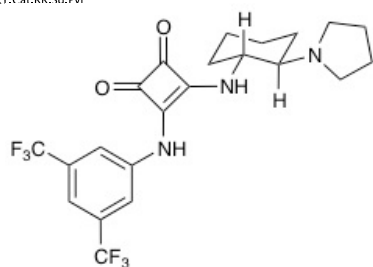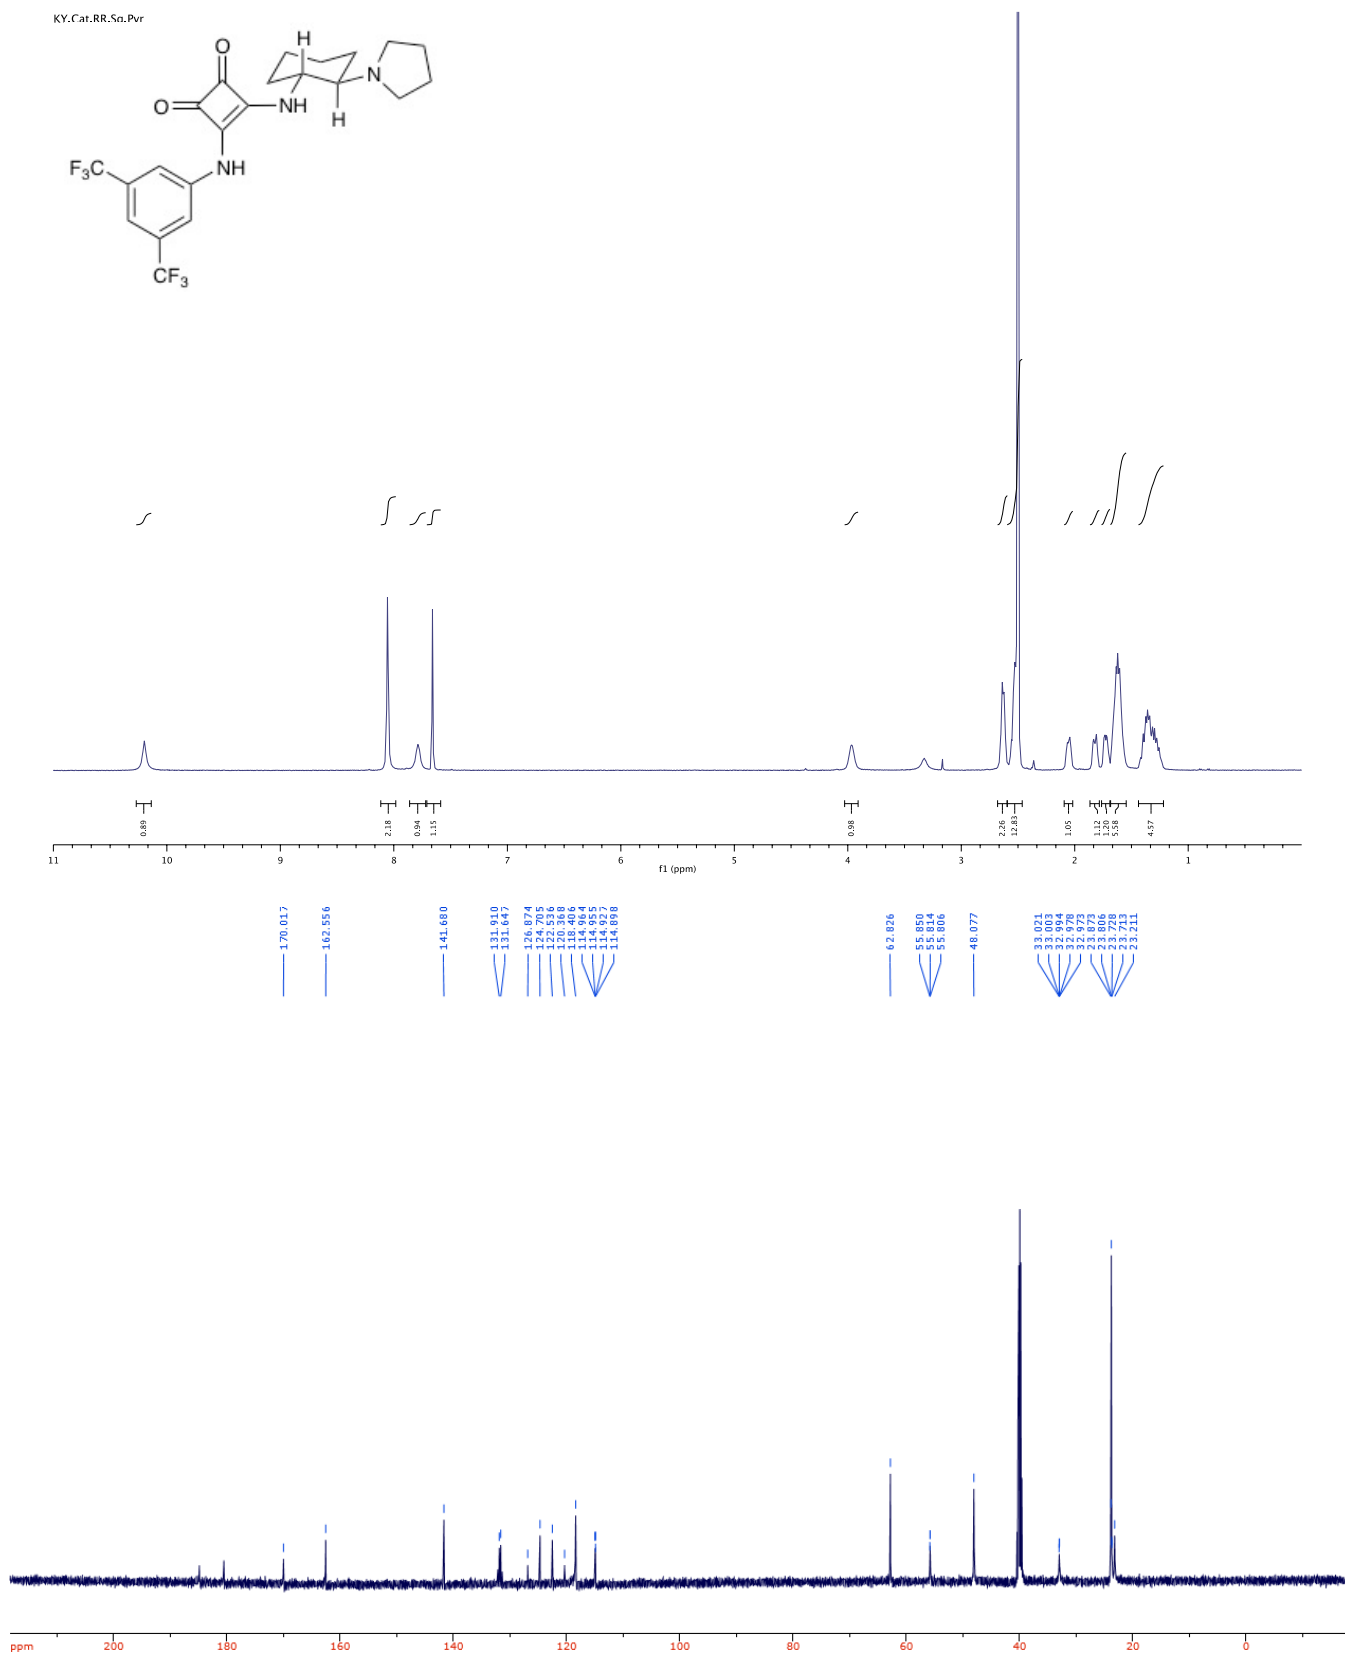



MAC Reagents

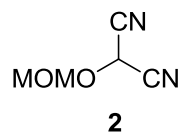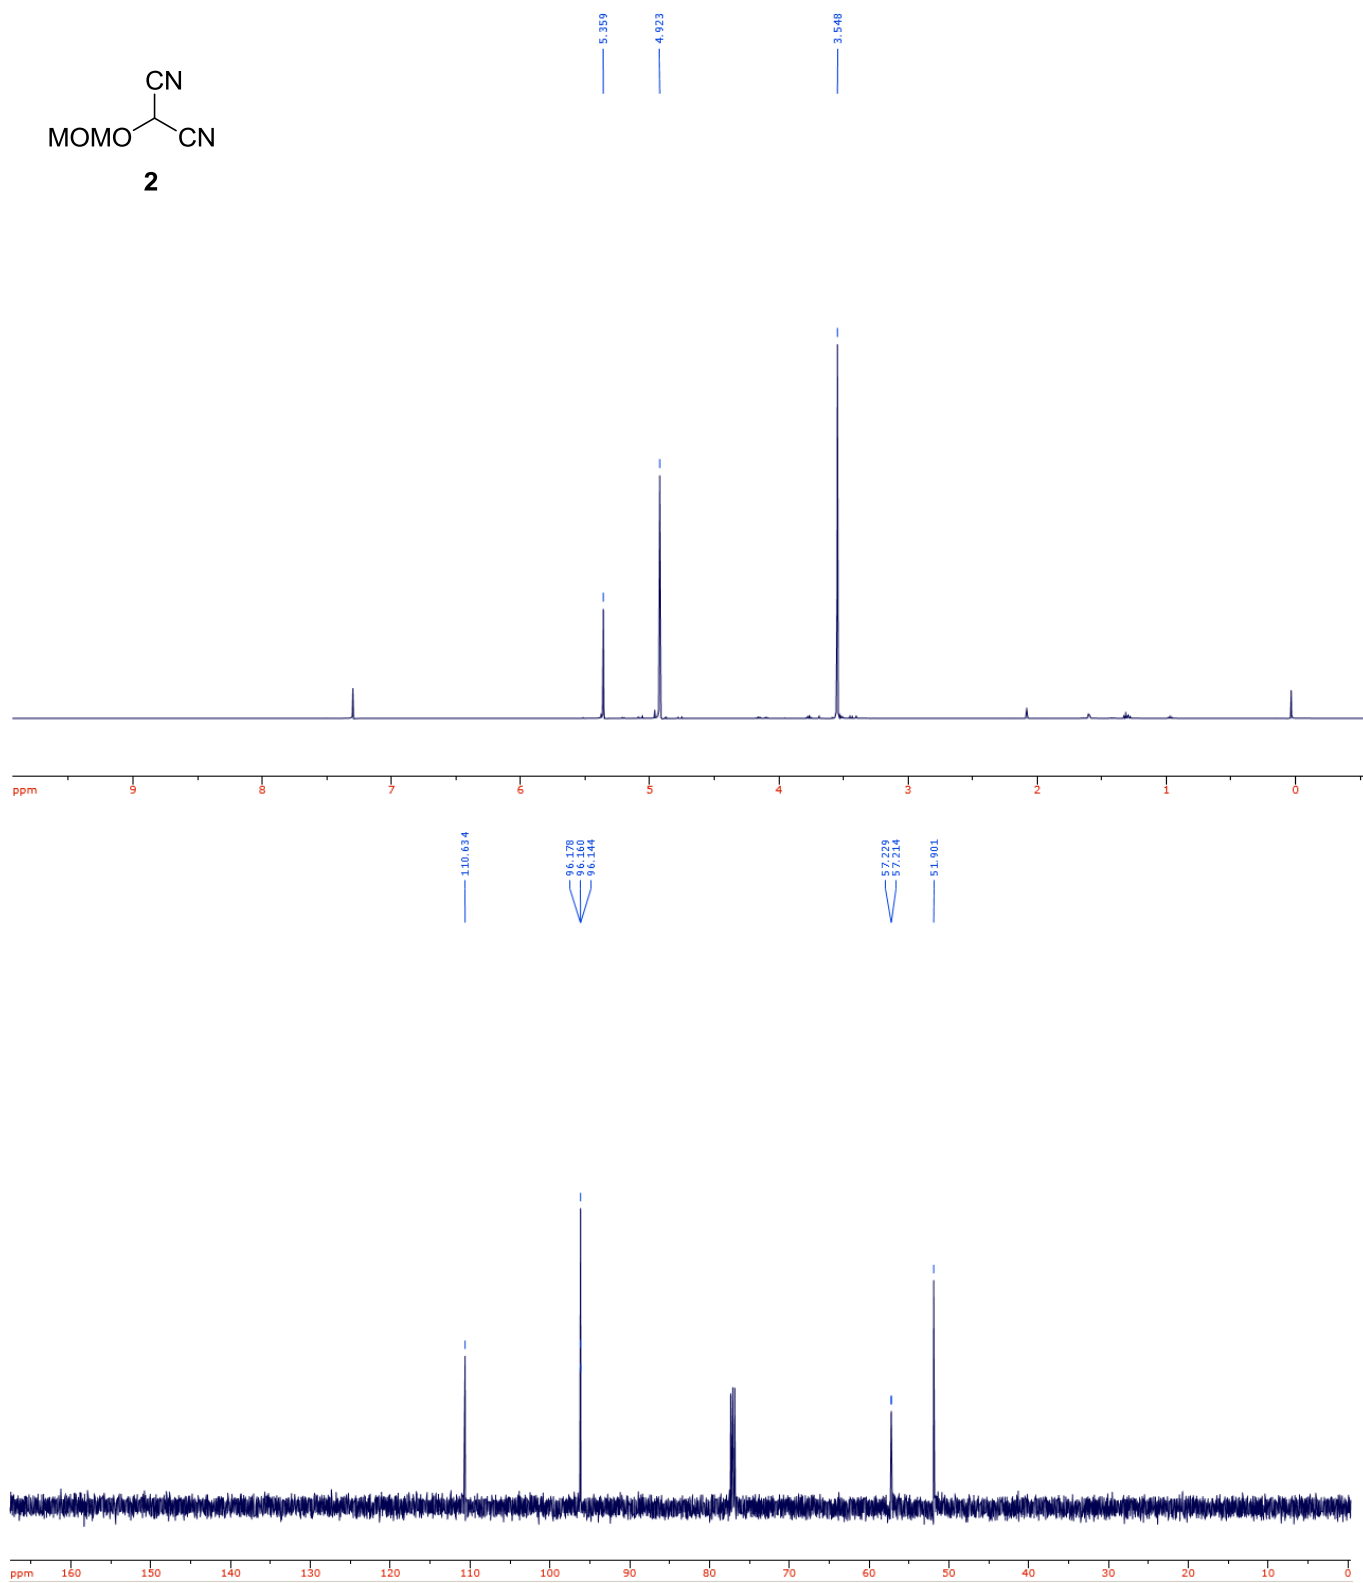

TBS MAC

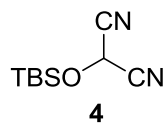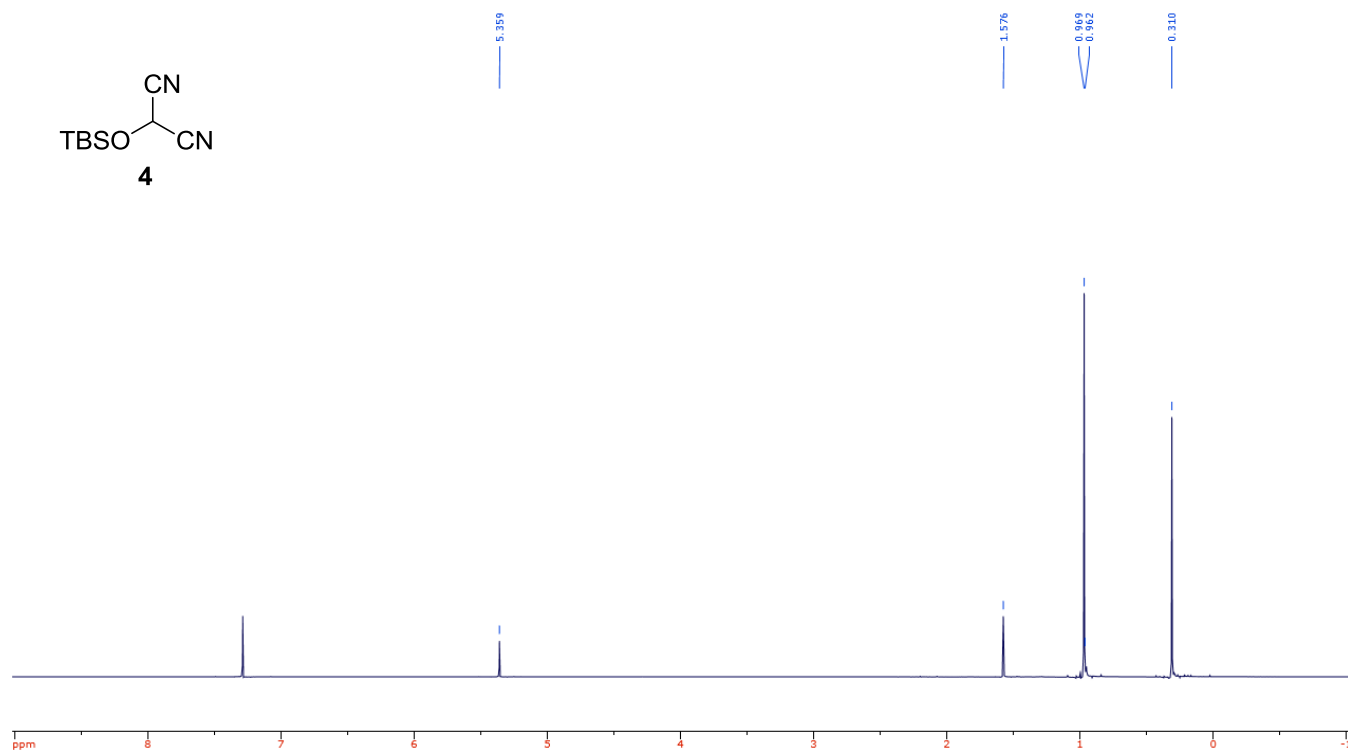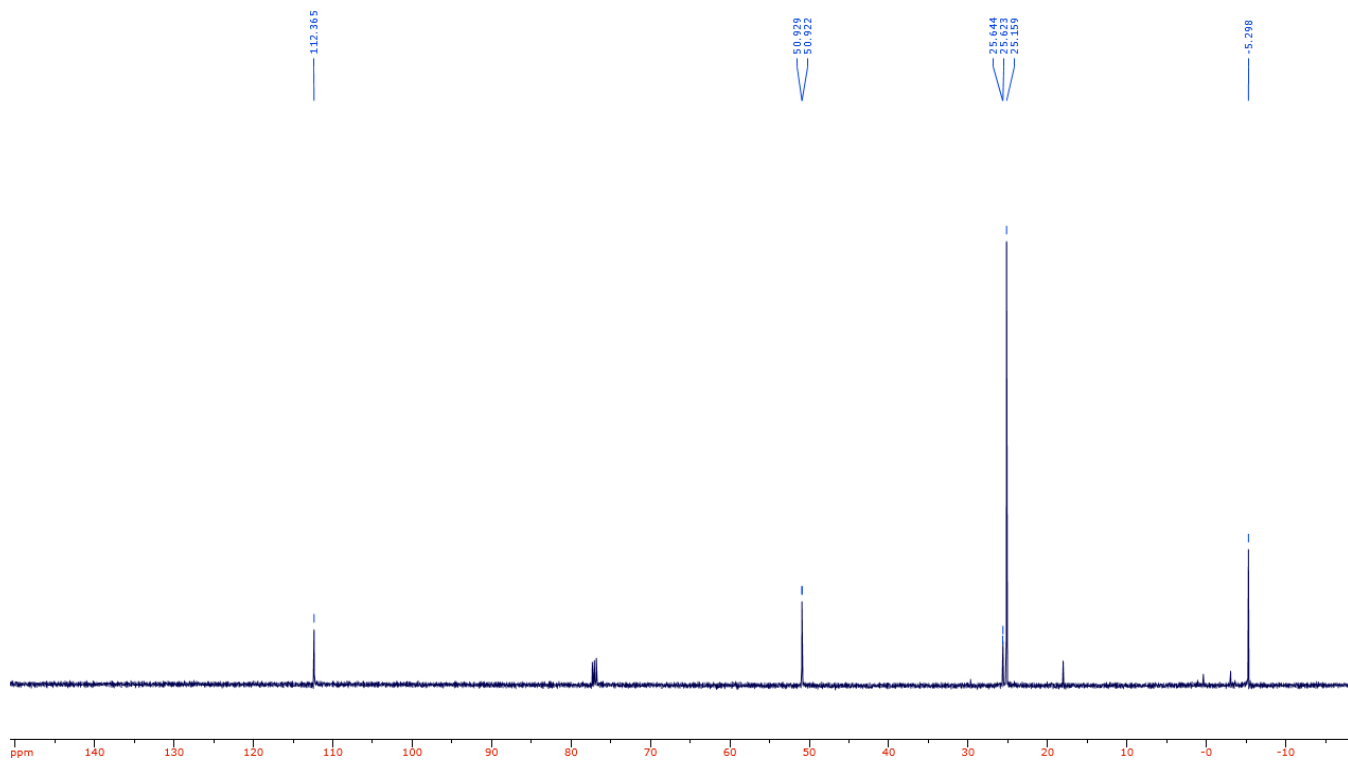

## Michael Addition Adducts

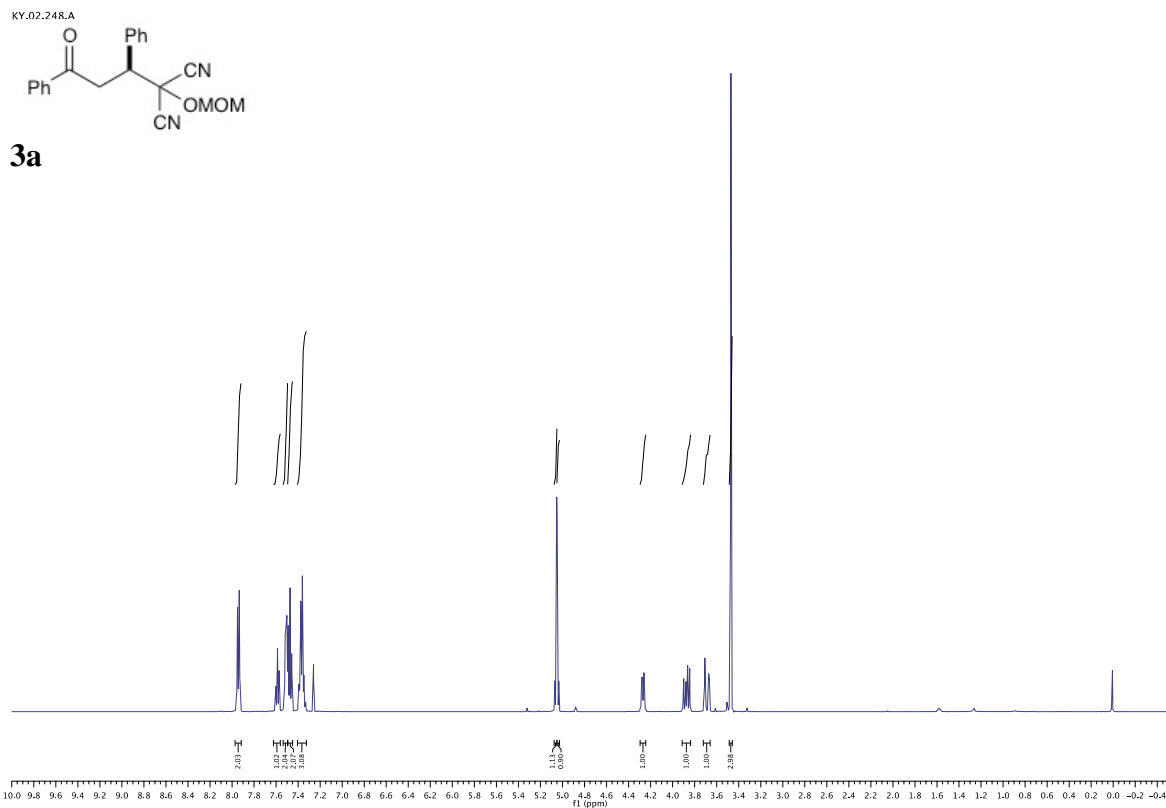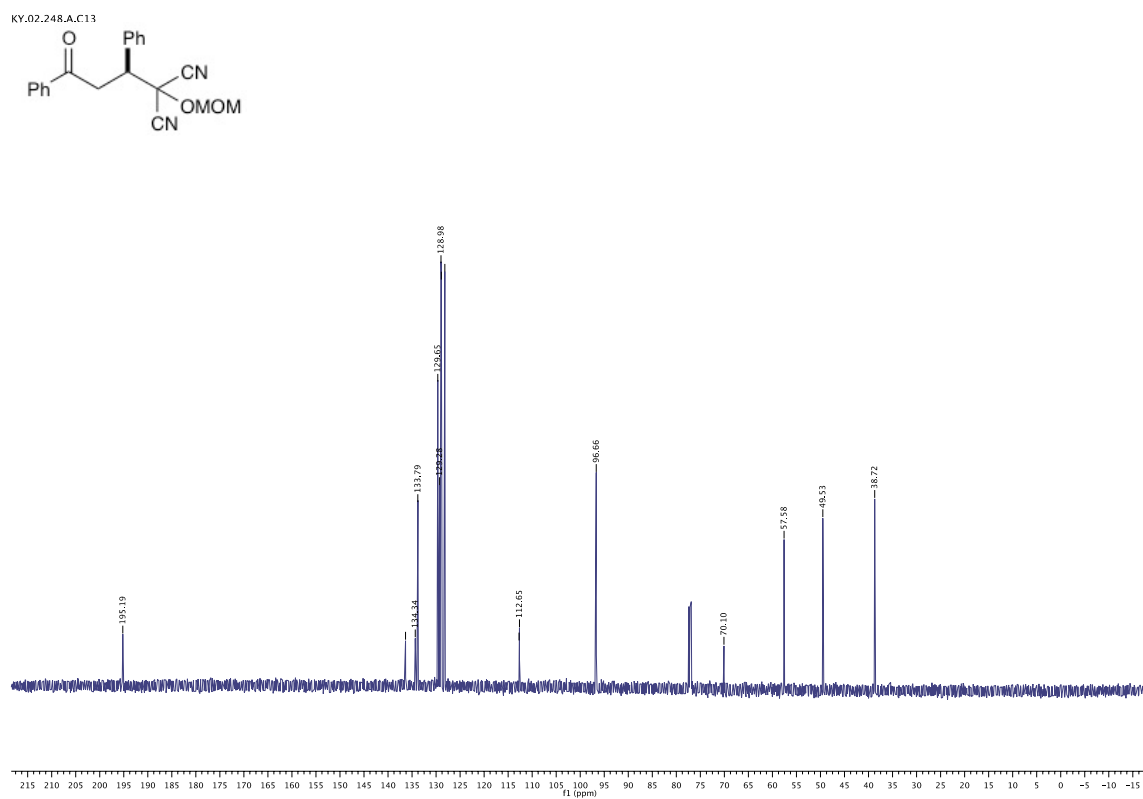

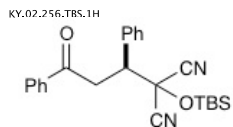**5a**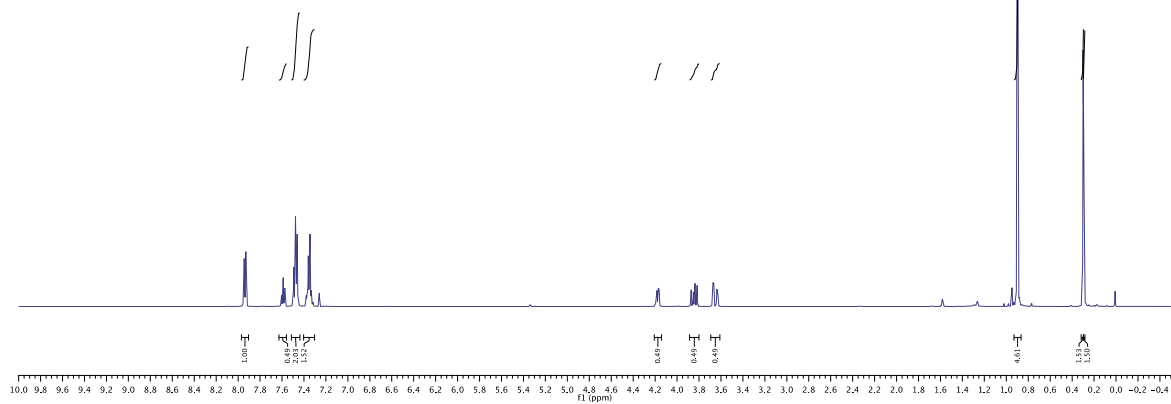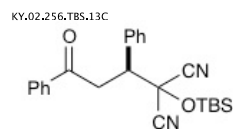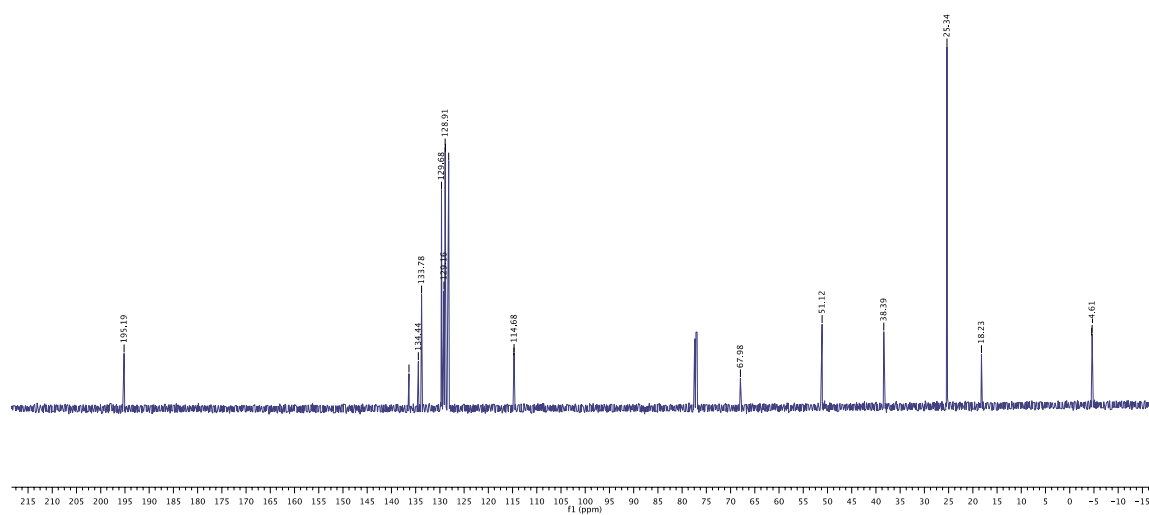

KY.02.249.A.1H

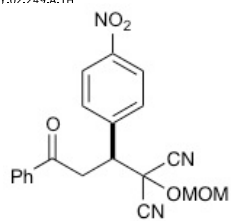**3b**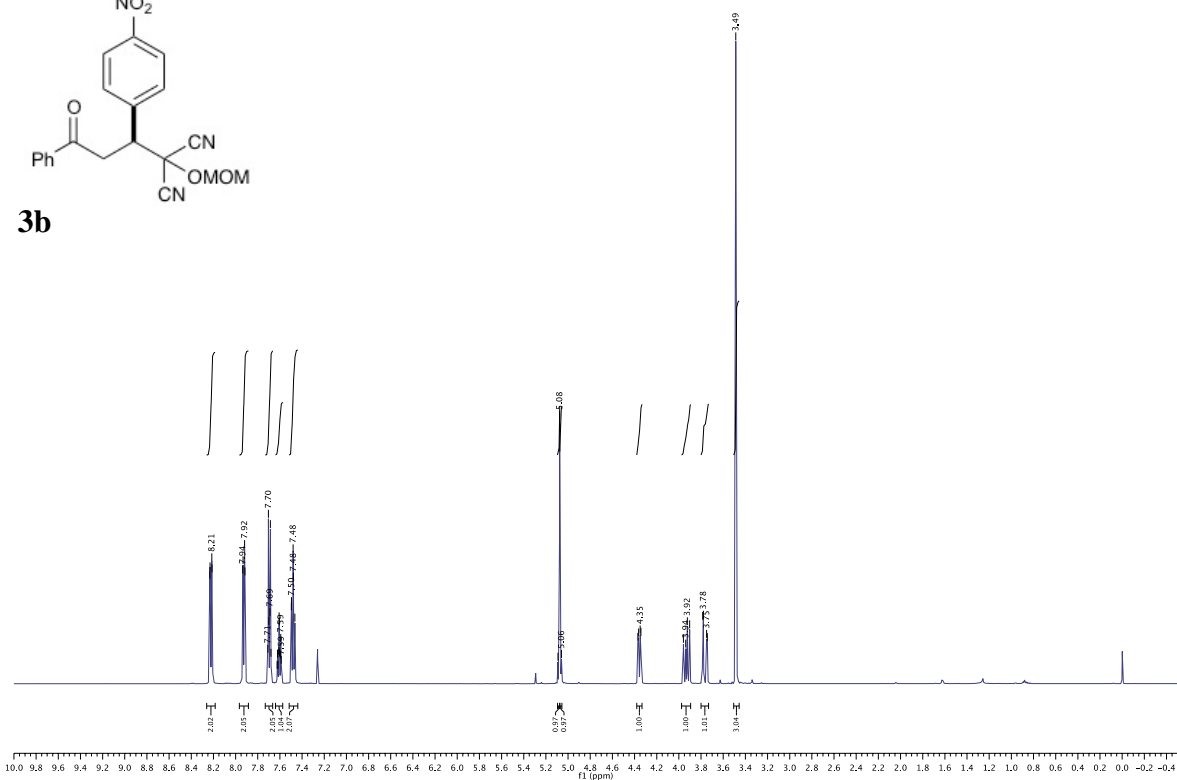

KY.02.249.A.13C

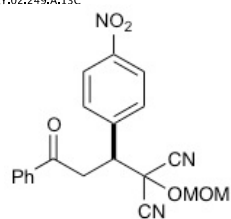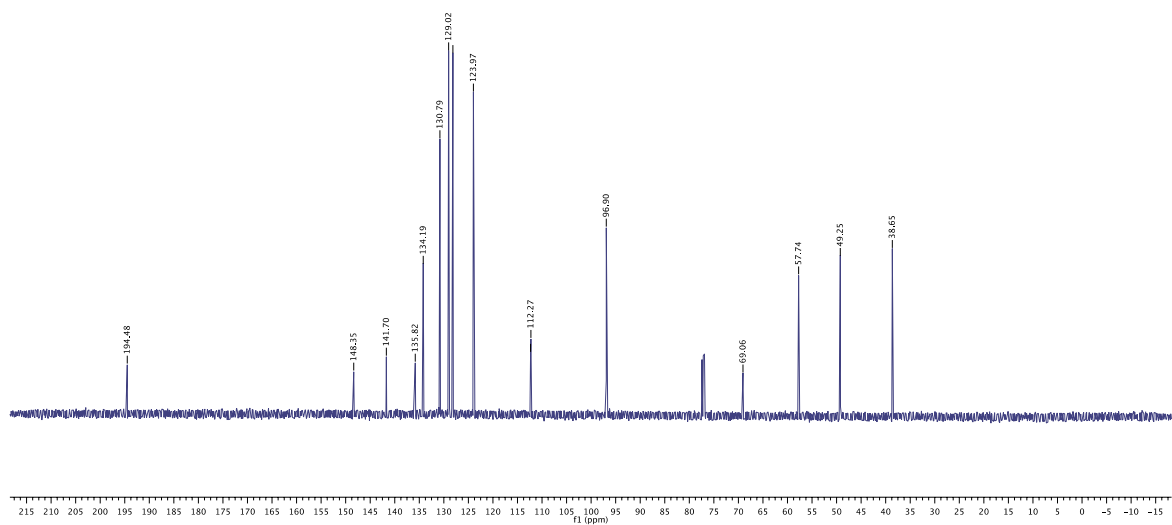

KY.03.046.A.1H

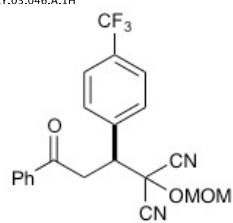

**3c**

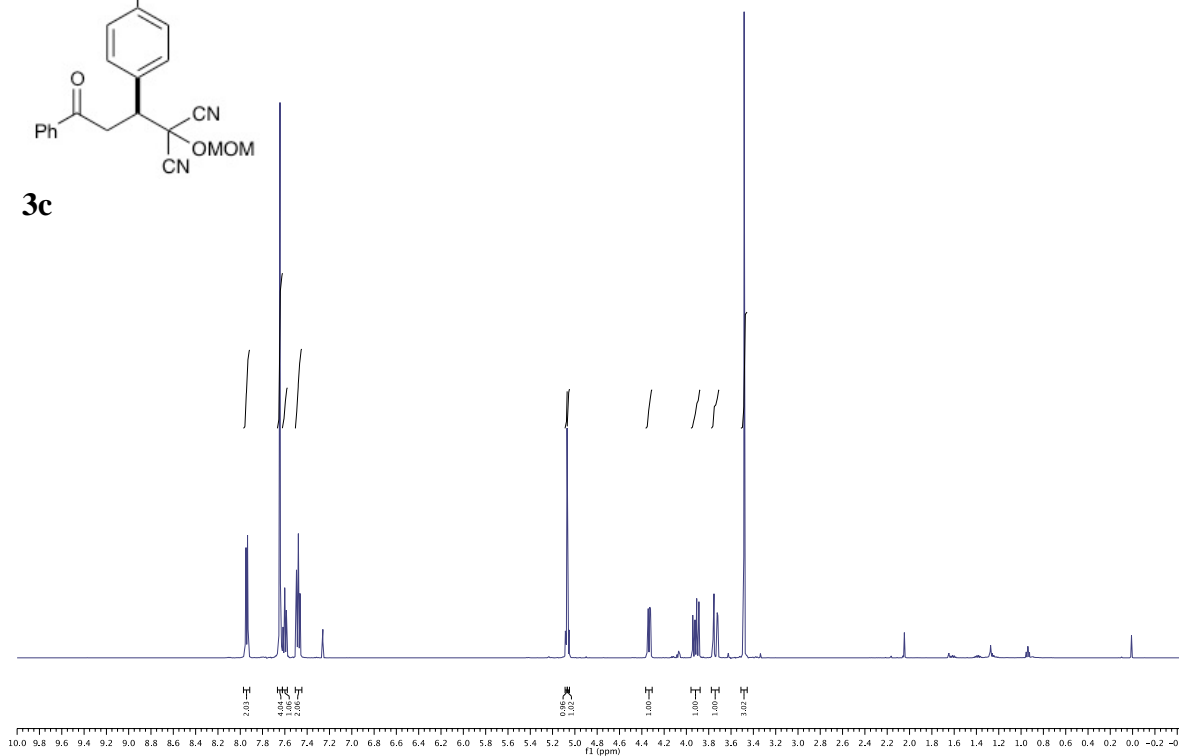

KY.03.046.A.13C

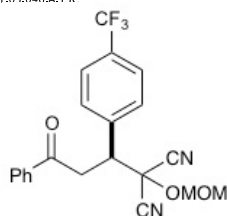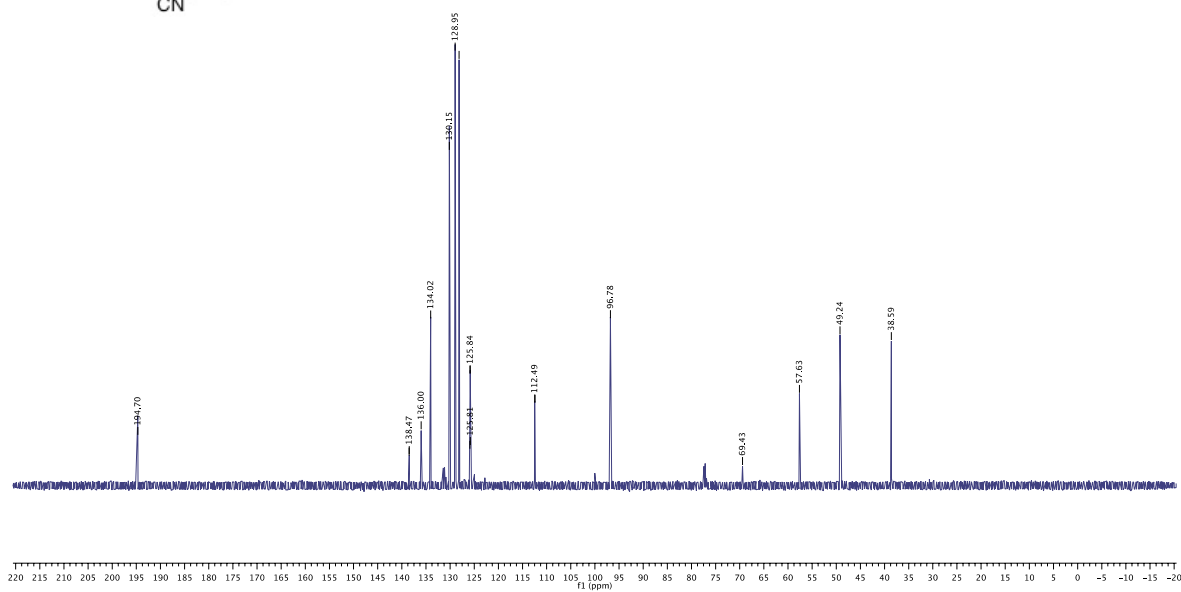

KY.03.050.A.1H

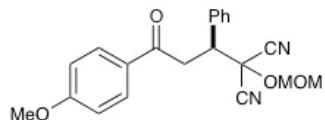

**3d**

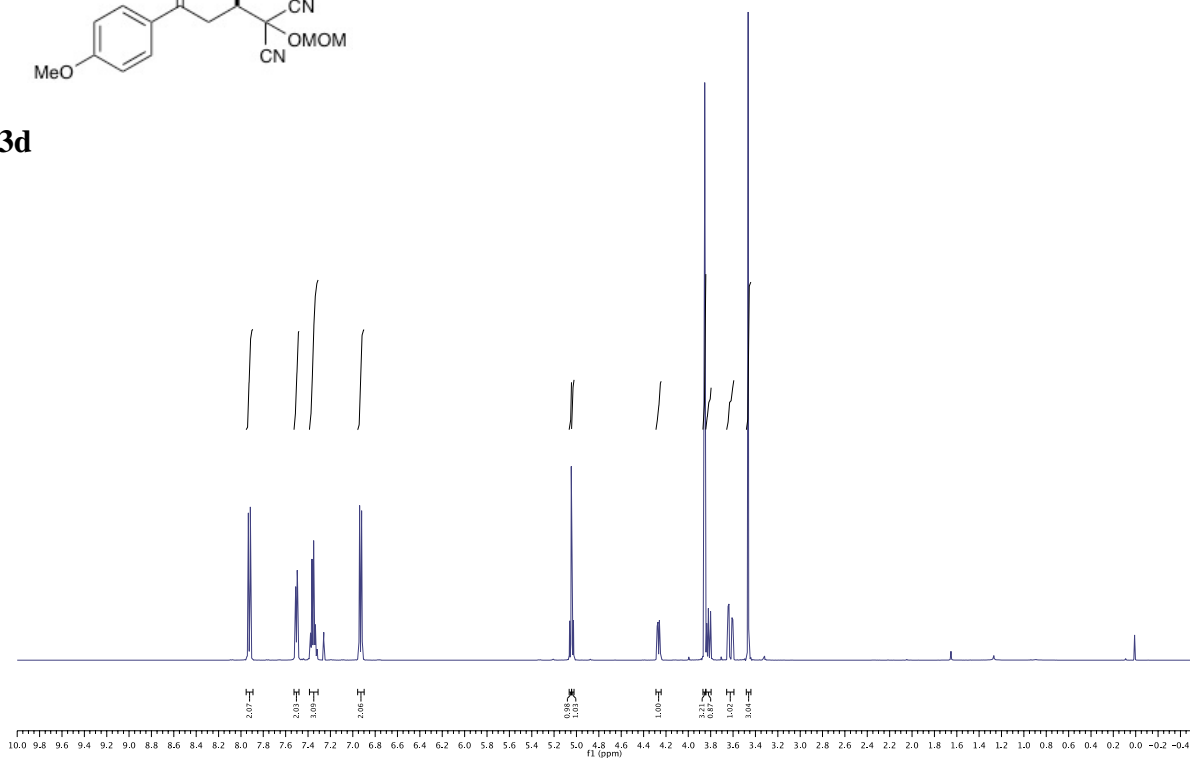

KY.03.050.A.13C

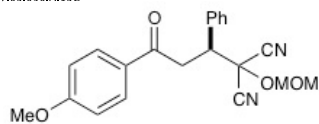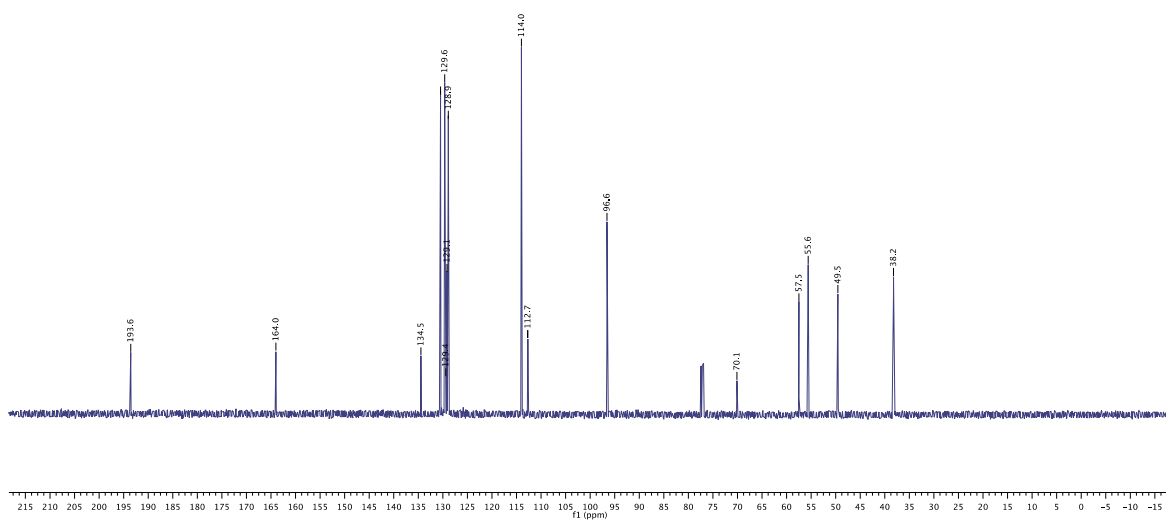

KY.03.043.R.1H

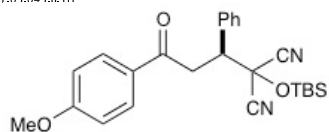

**5d**

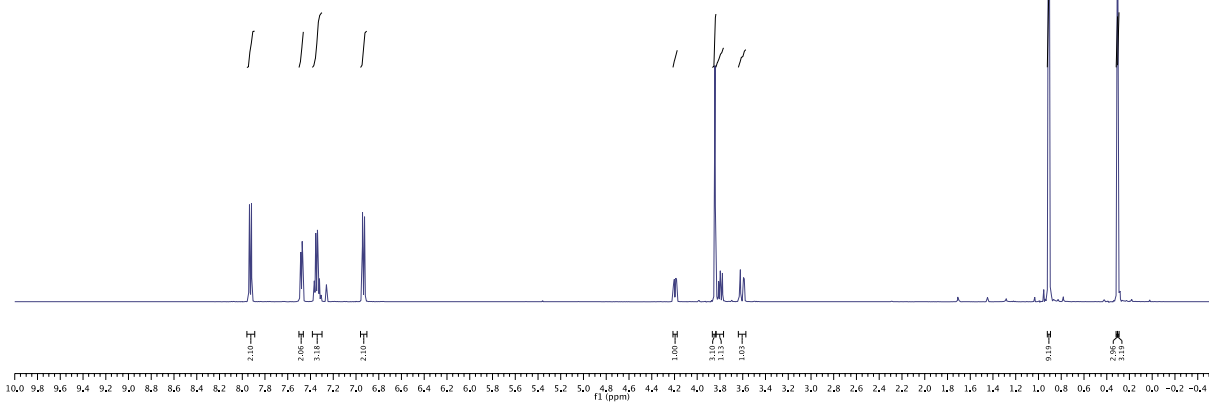

KY.03.043.R.13C

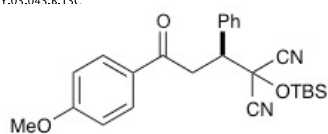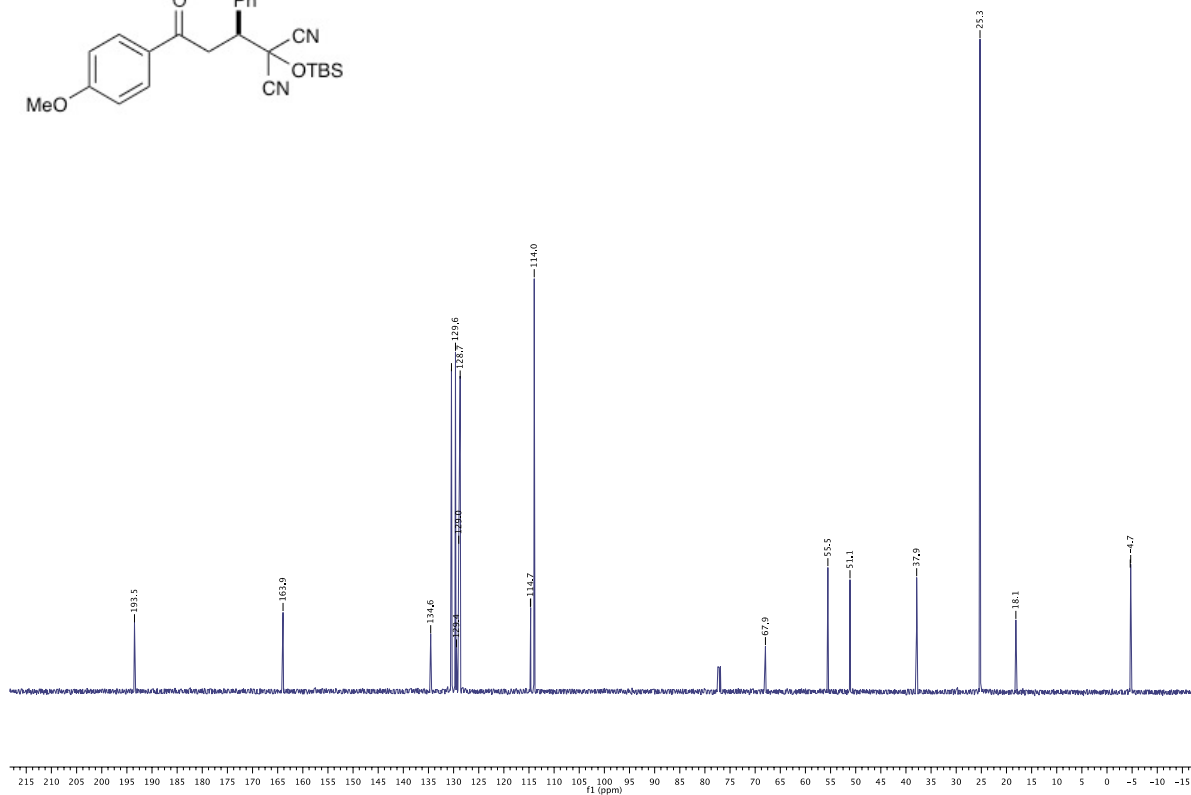



ky.02.248.B

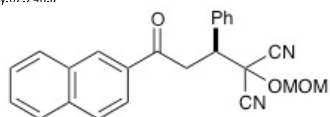

**3e**

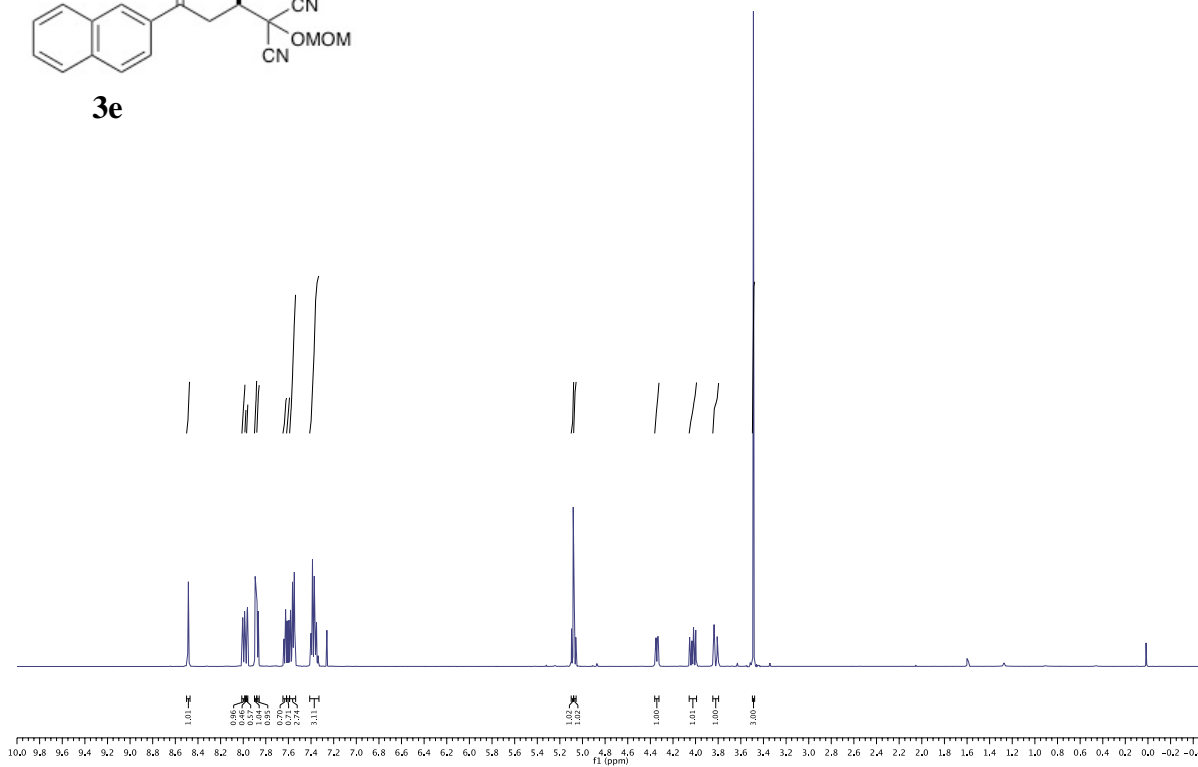

ky.02.248.B.13C

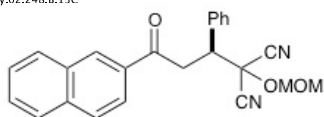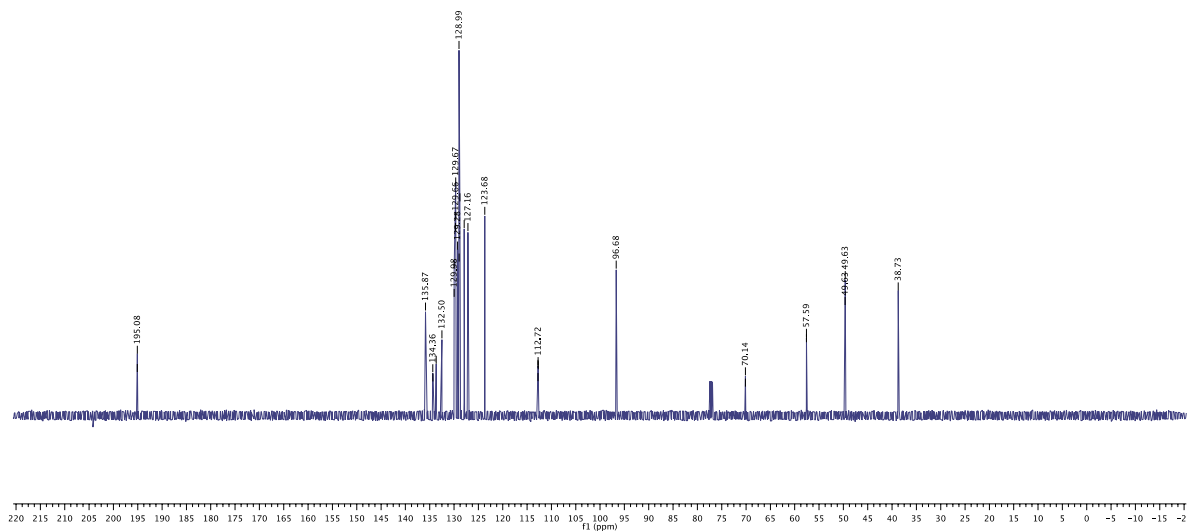

KY.03.038.R.11C

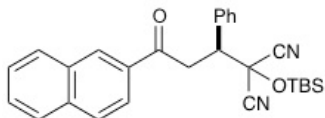

**5e**

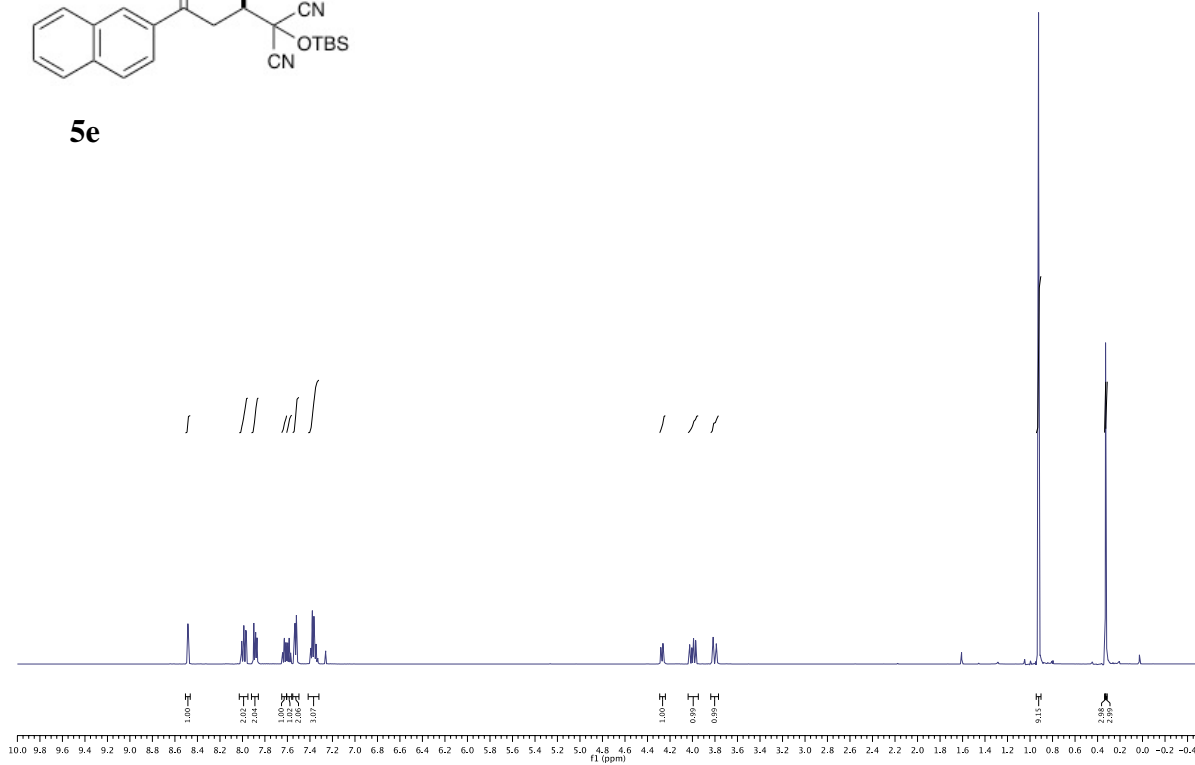

KY.03.038.R.13C

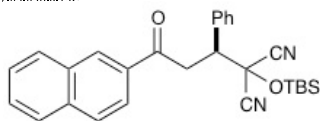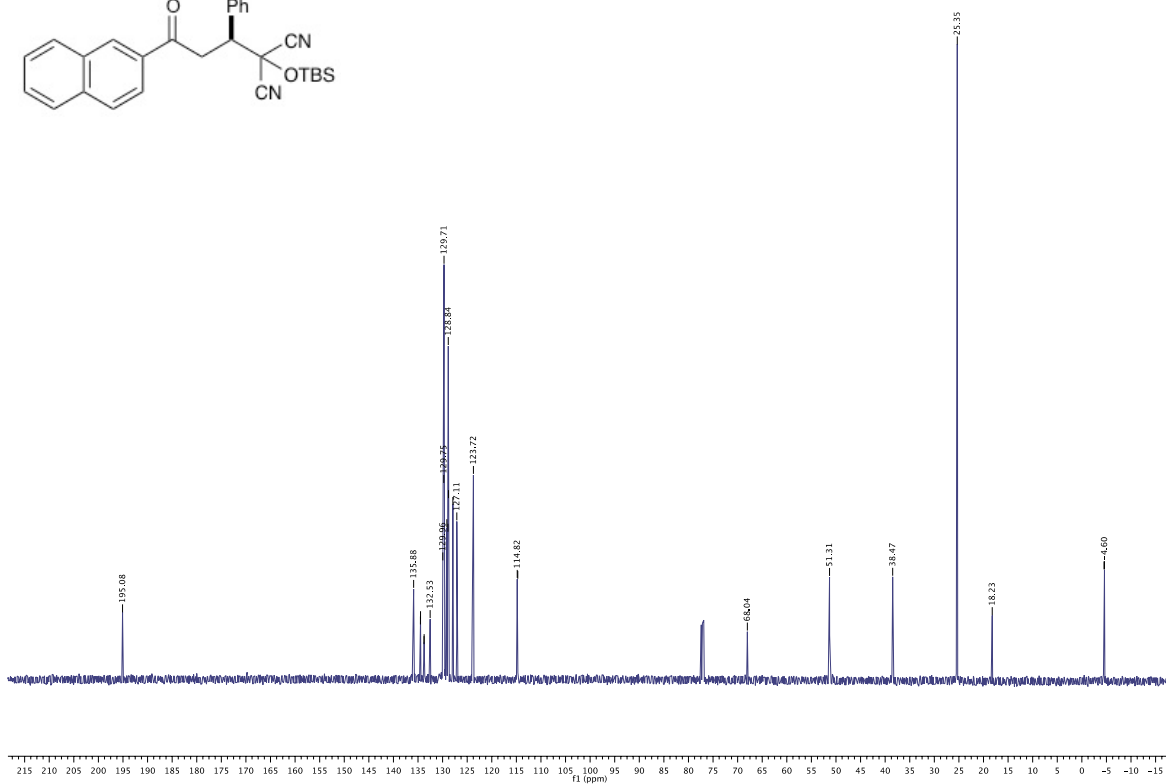

KY.03.044.A.1H

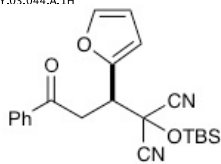

**5f**

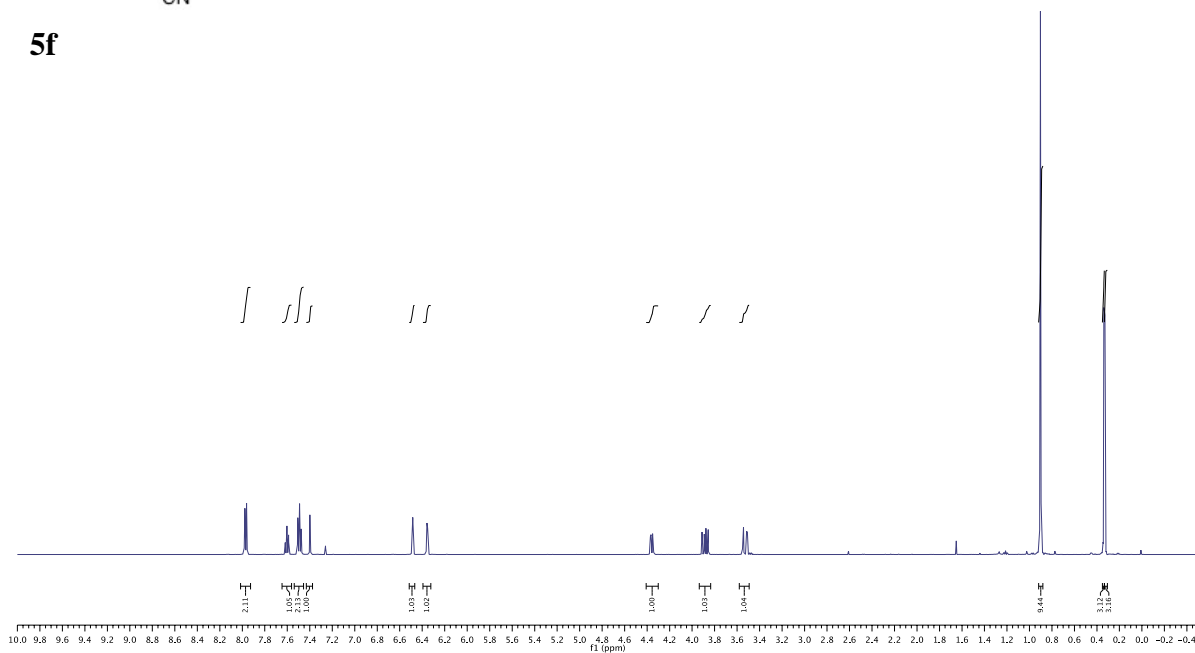

KY.03.044.A.13C

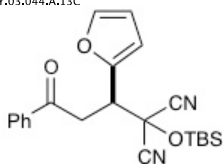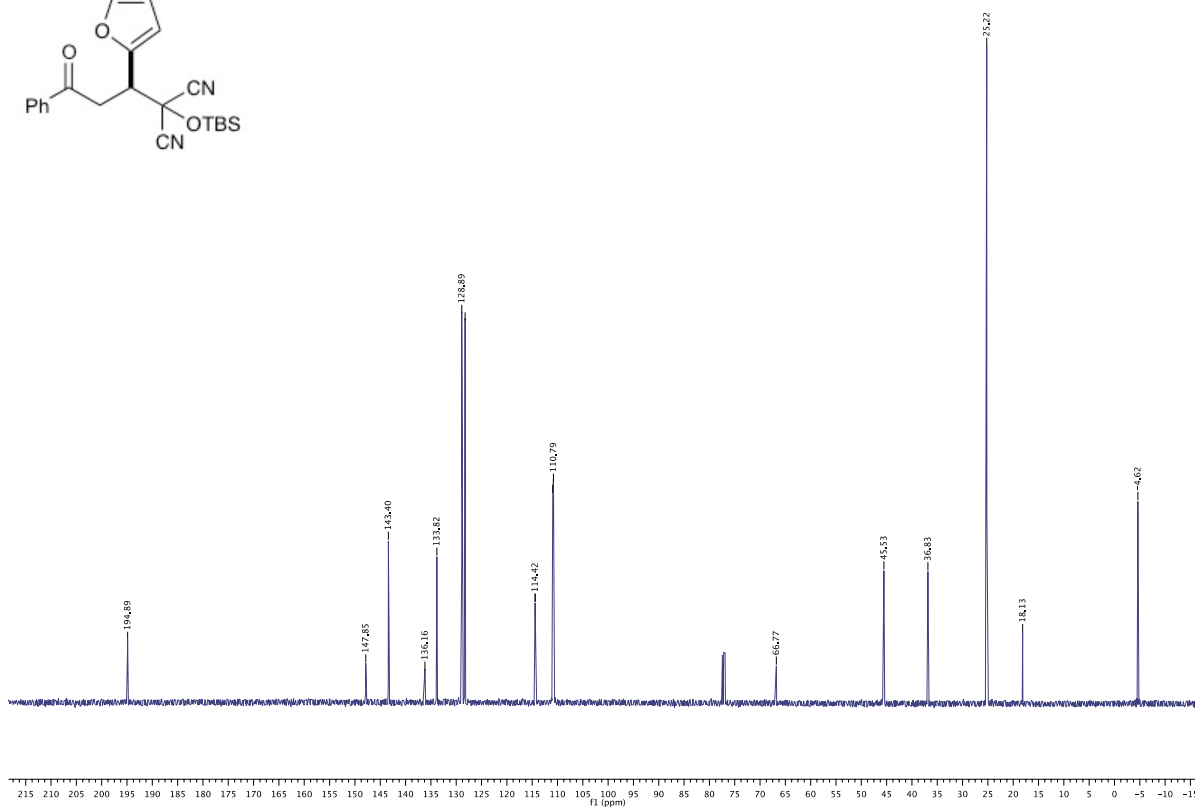

KY.03.042.C.1H

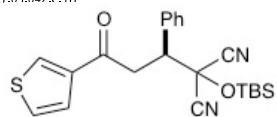

5g

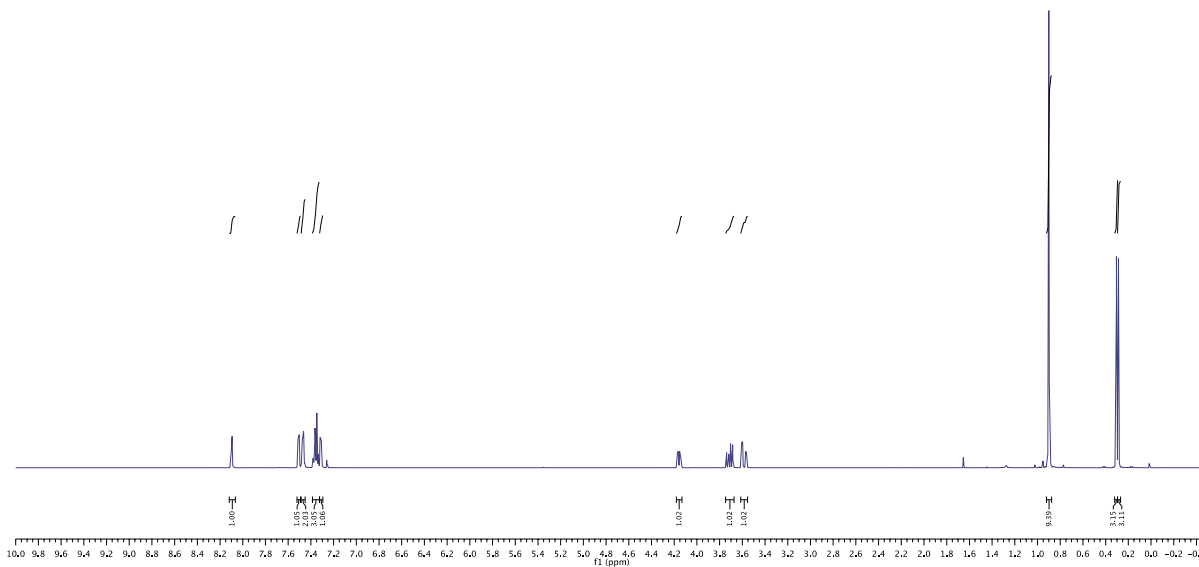

KY.03.042.C.13C

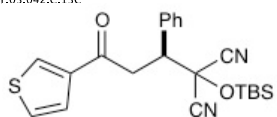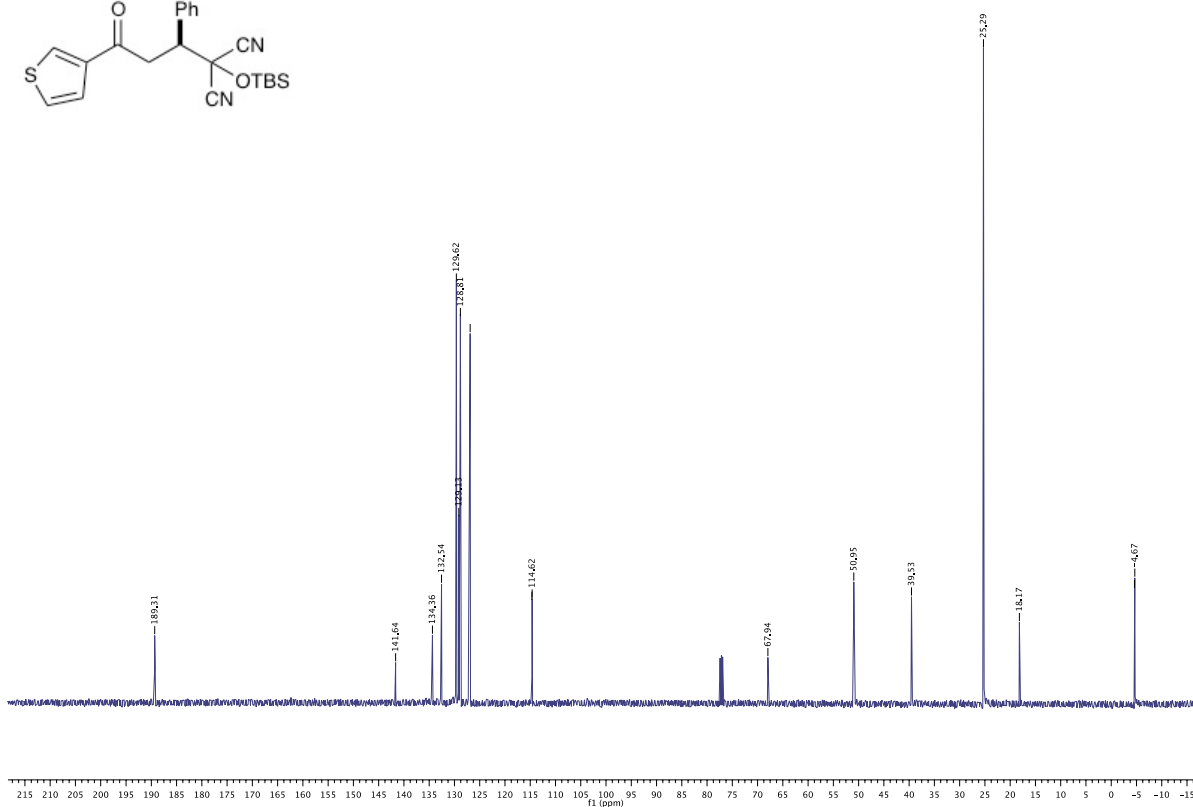

KY.02.249.R.1H

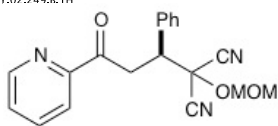**3h**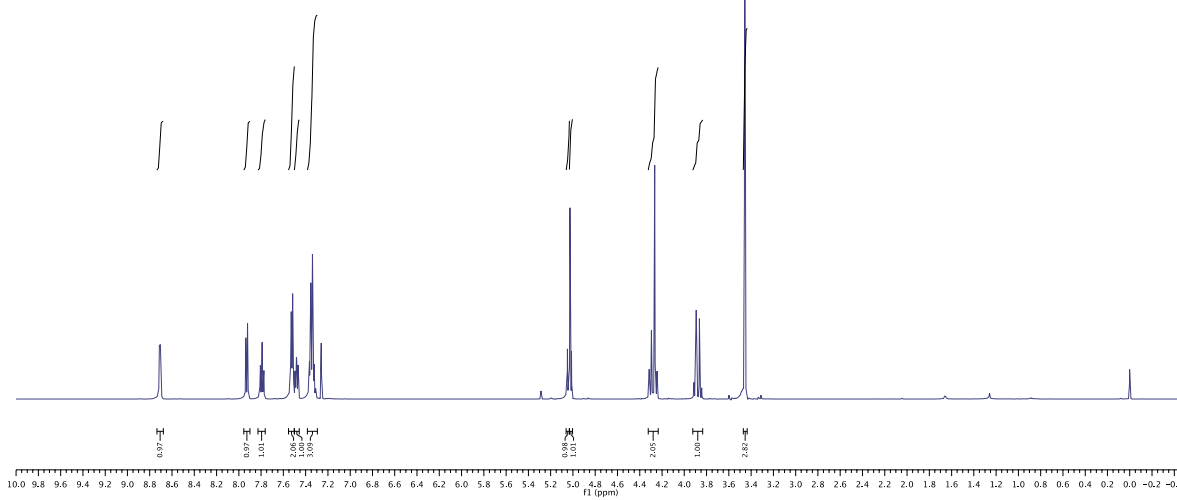

KY.02.249.R.13C

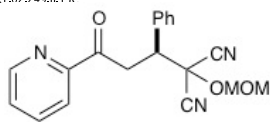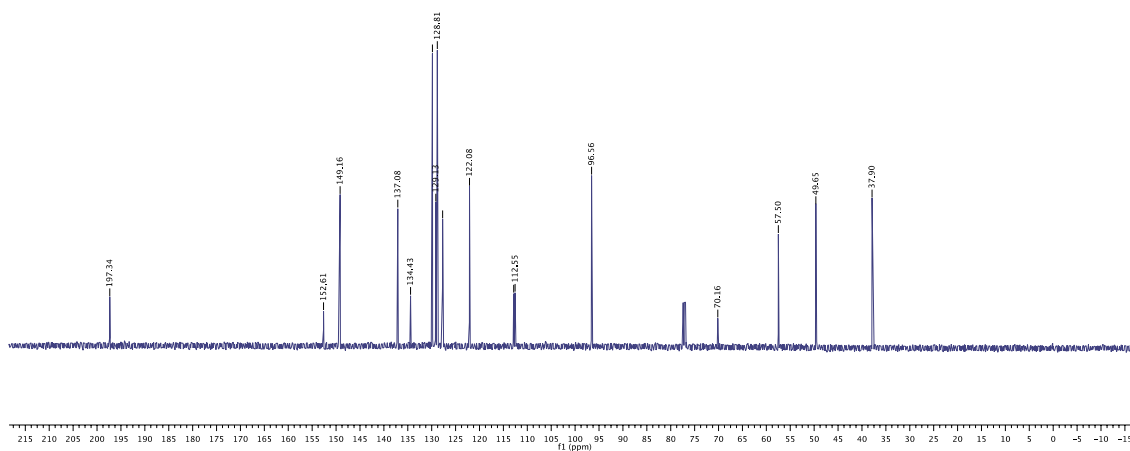

KY.03.050.B.1H

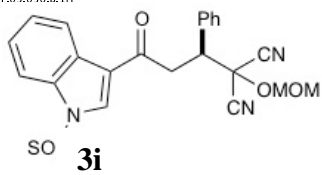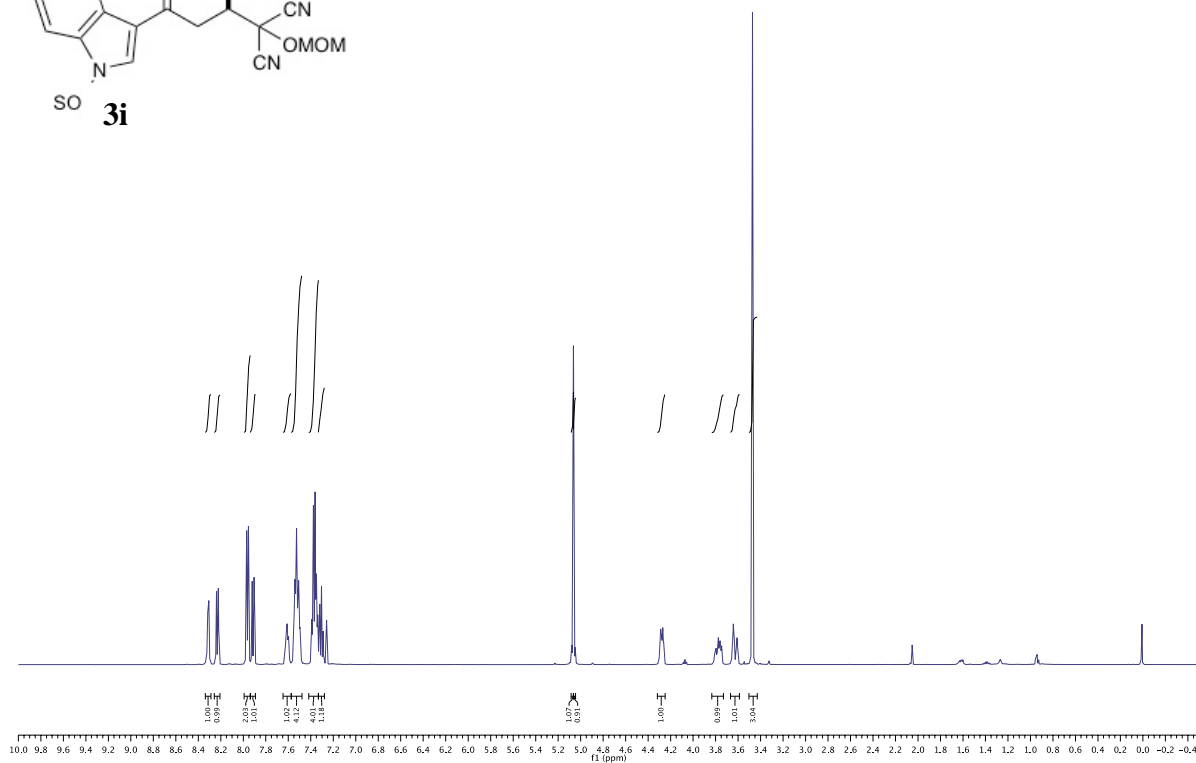

KY.03.050.B.13C

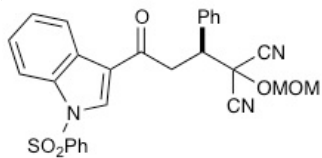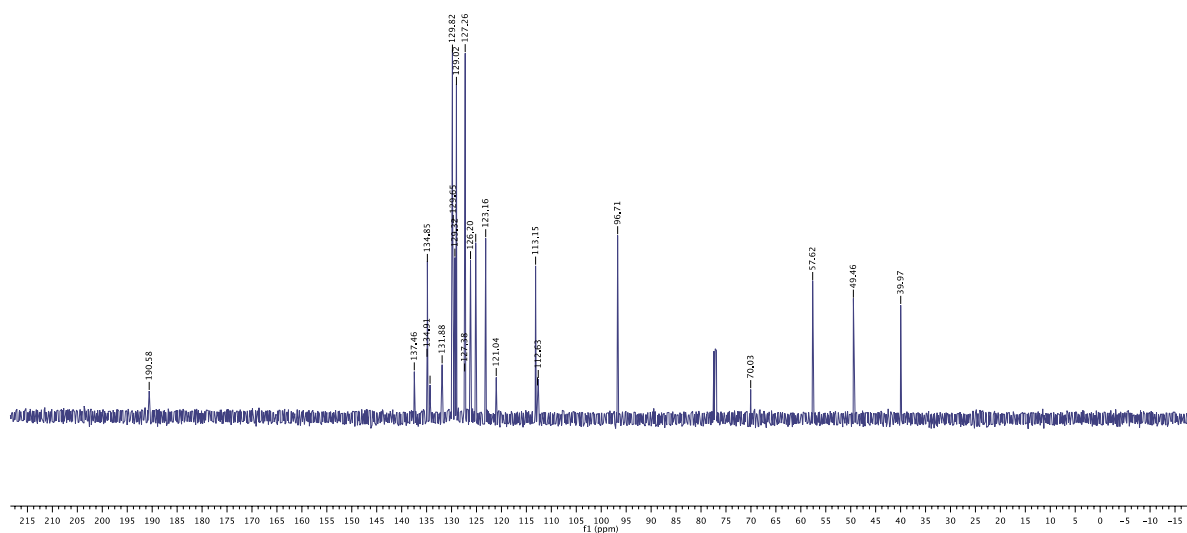

KY.03.044.B.1H

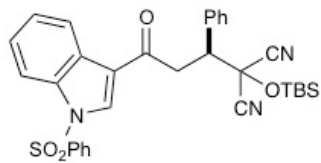**5i**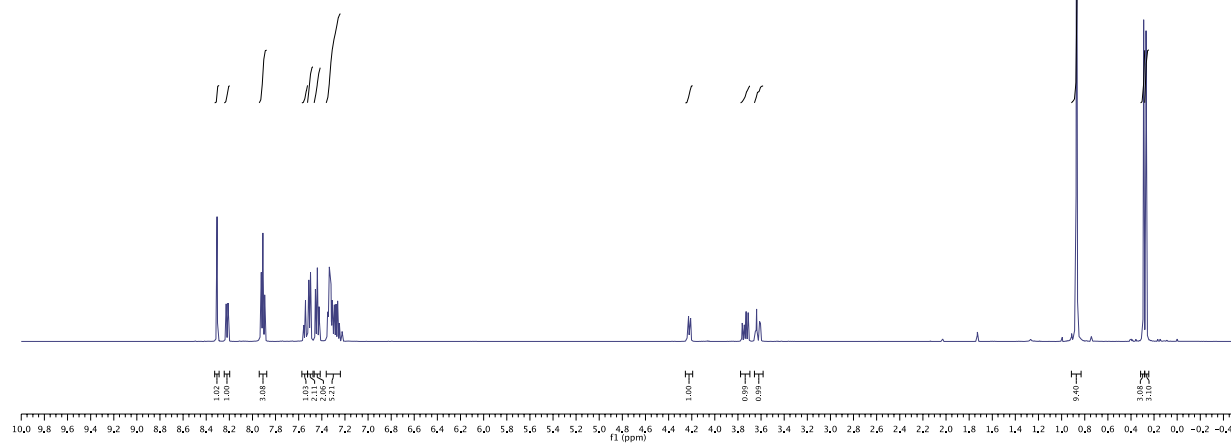

KY.03.044.B.13C

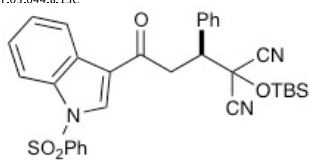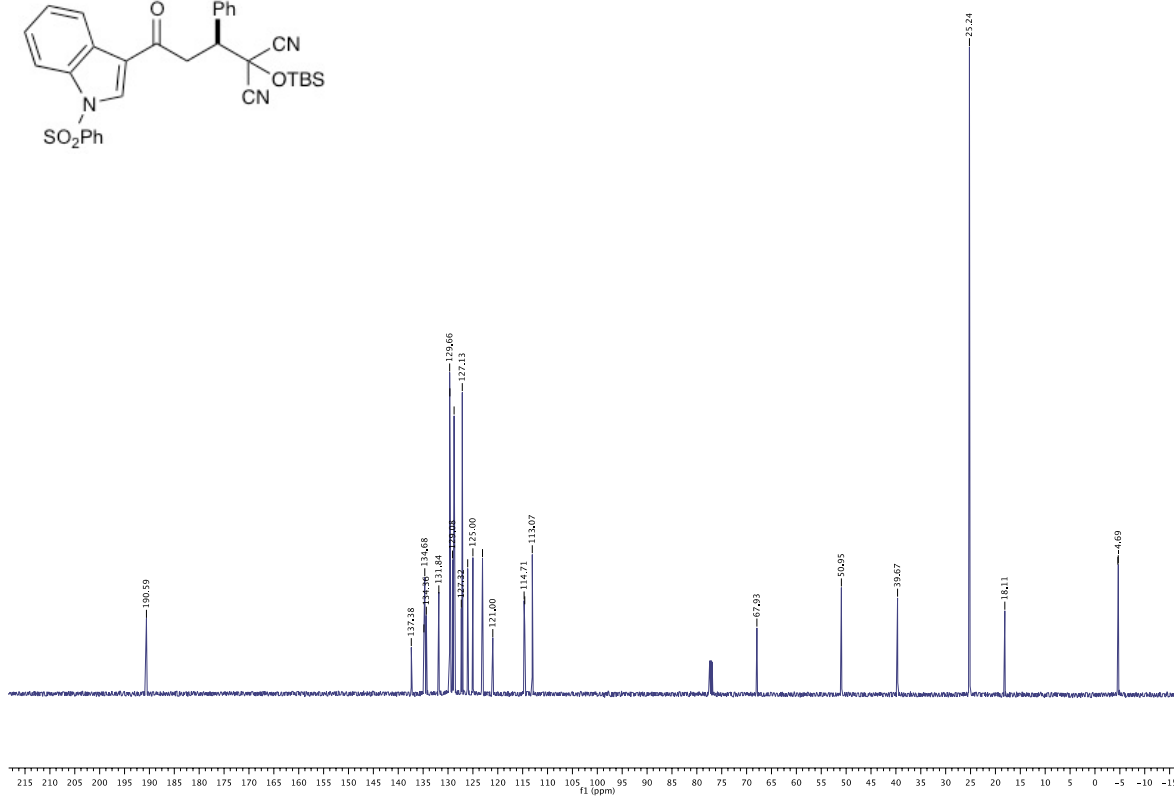

KY.03.051.A.1H

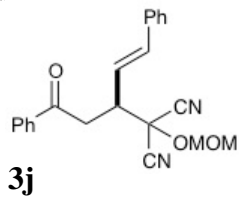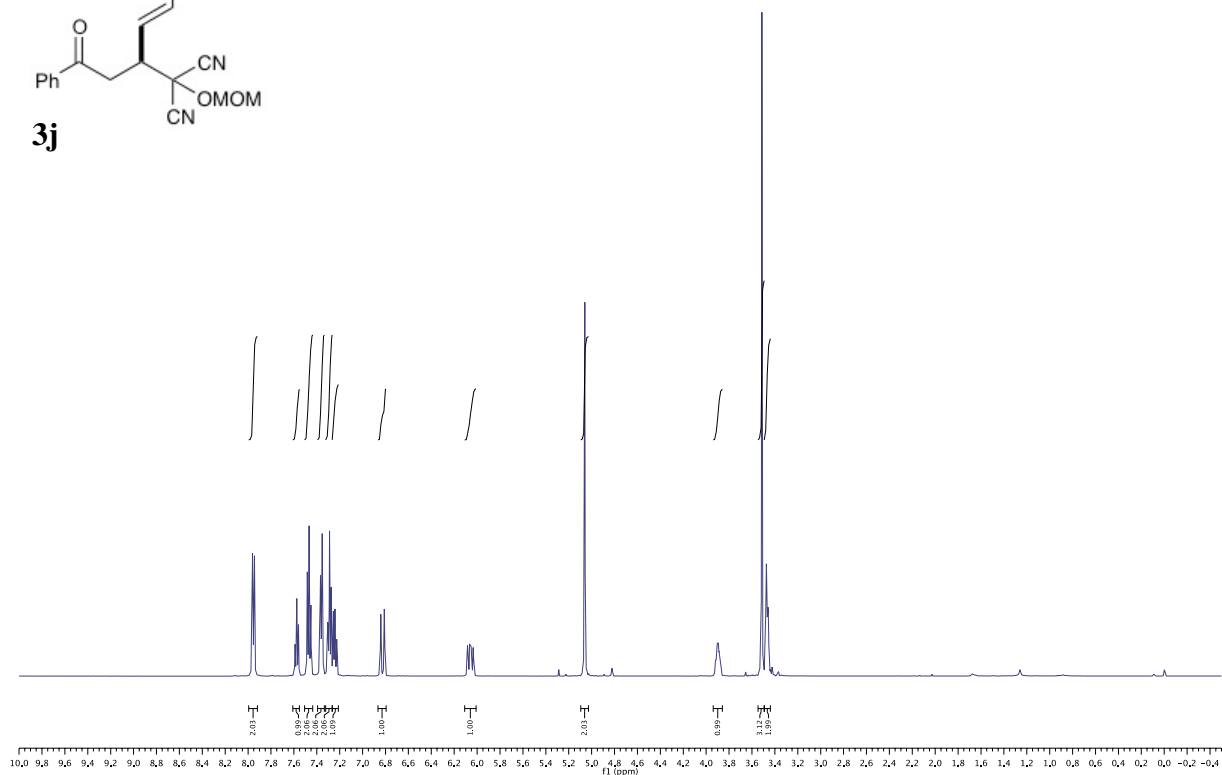

KY.03.051.A.13C

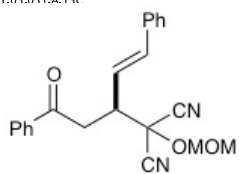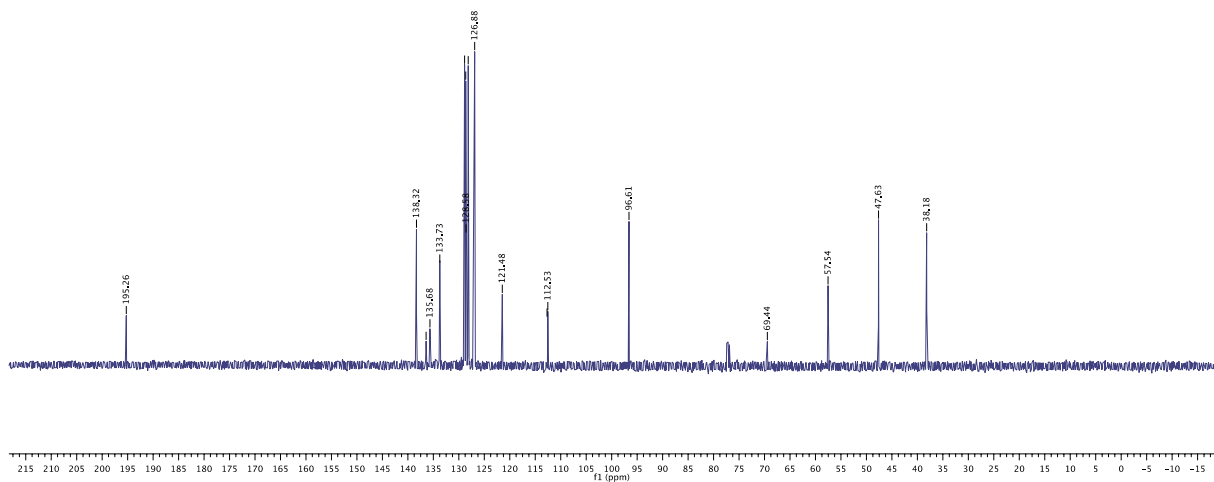



KY-03.043.A.1H

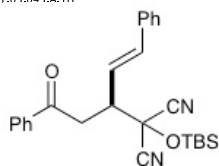

5j

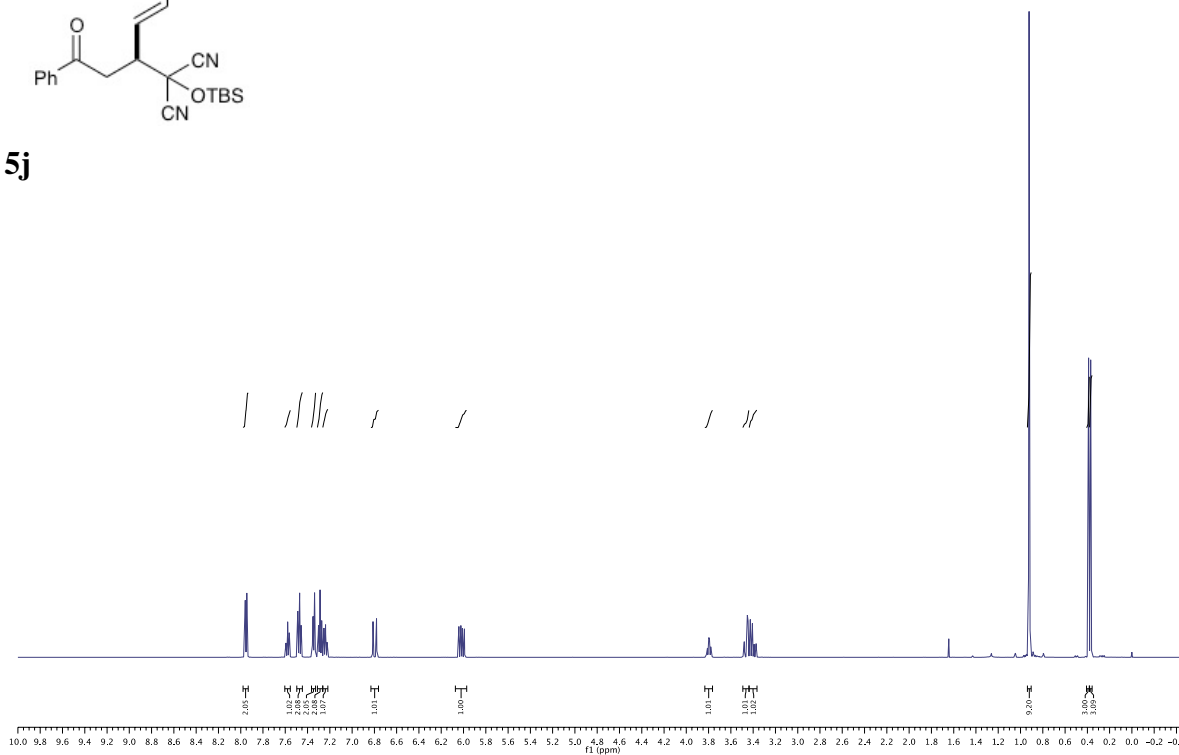

KY-03.043.A.13C

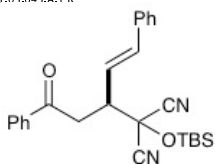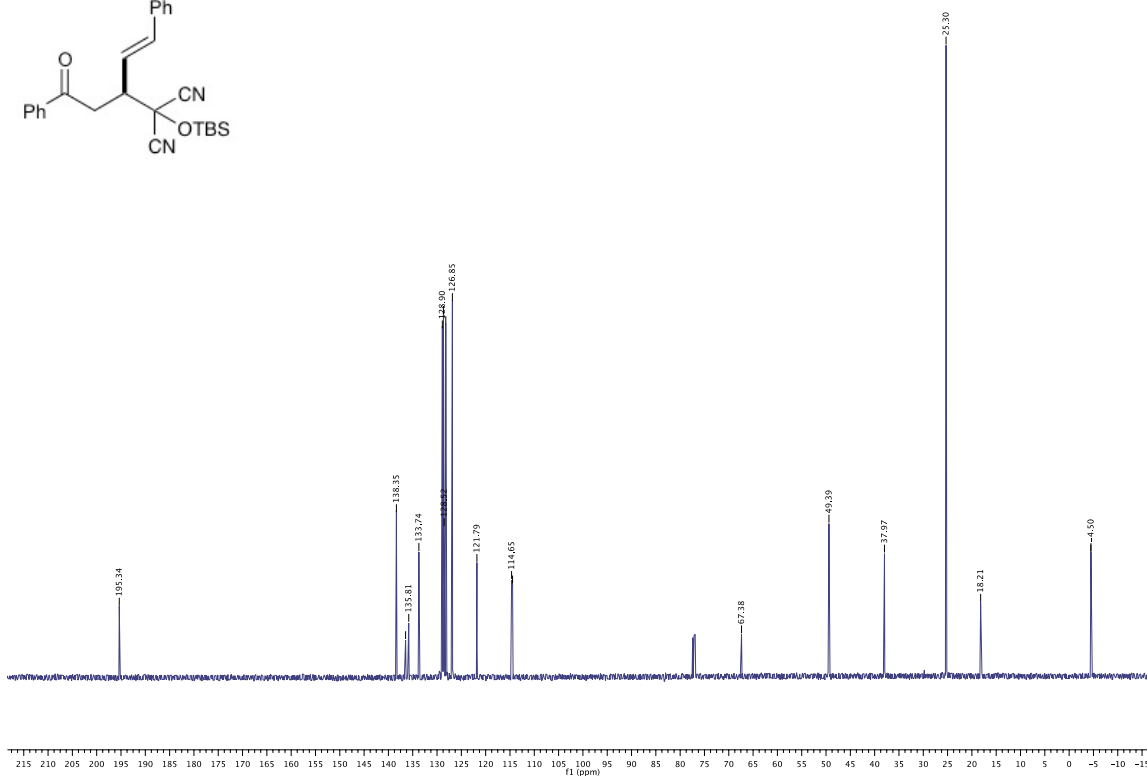

KY.03.049.R.1H

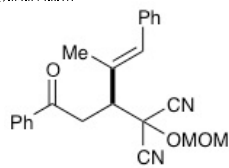

**3k**

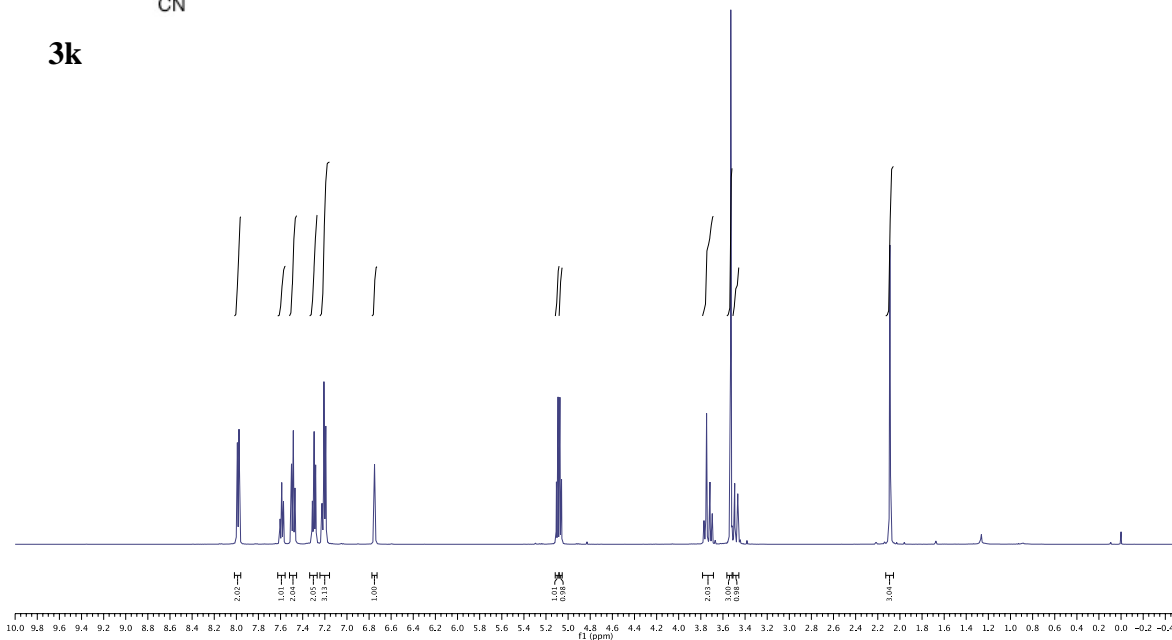

KY.03.049.R.13C

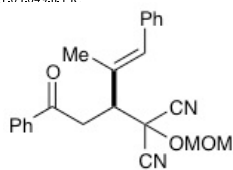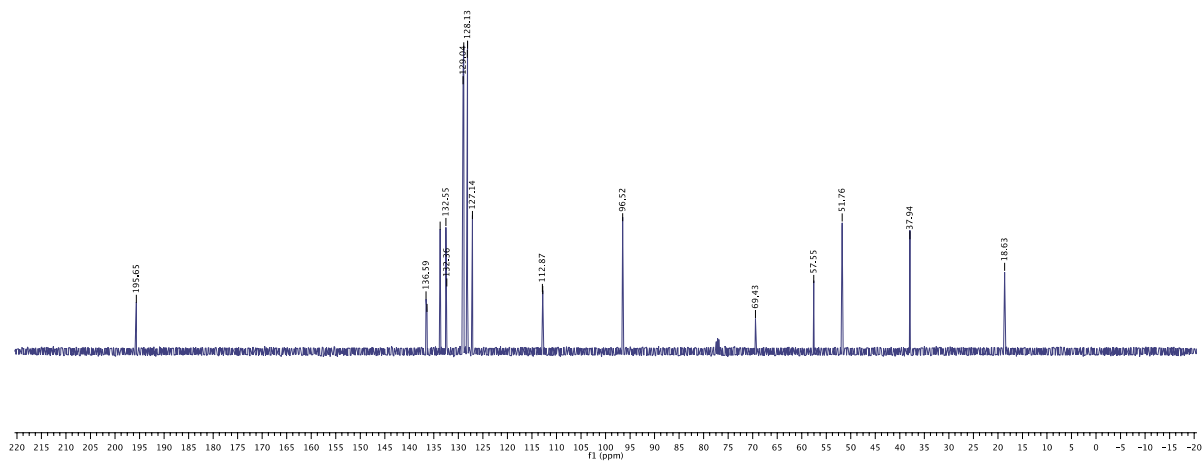

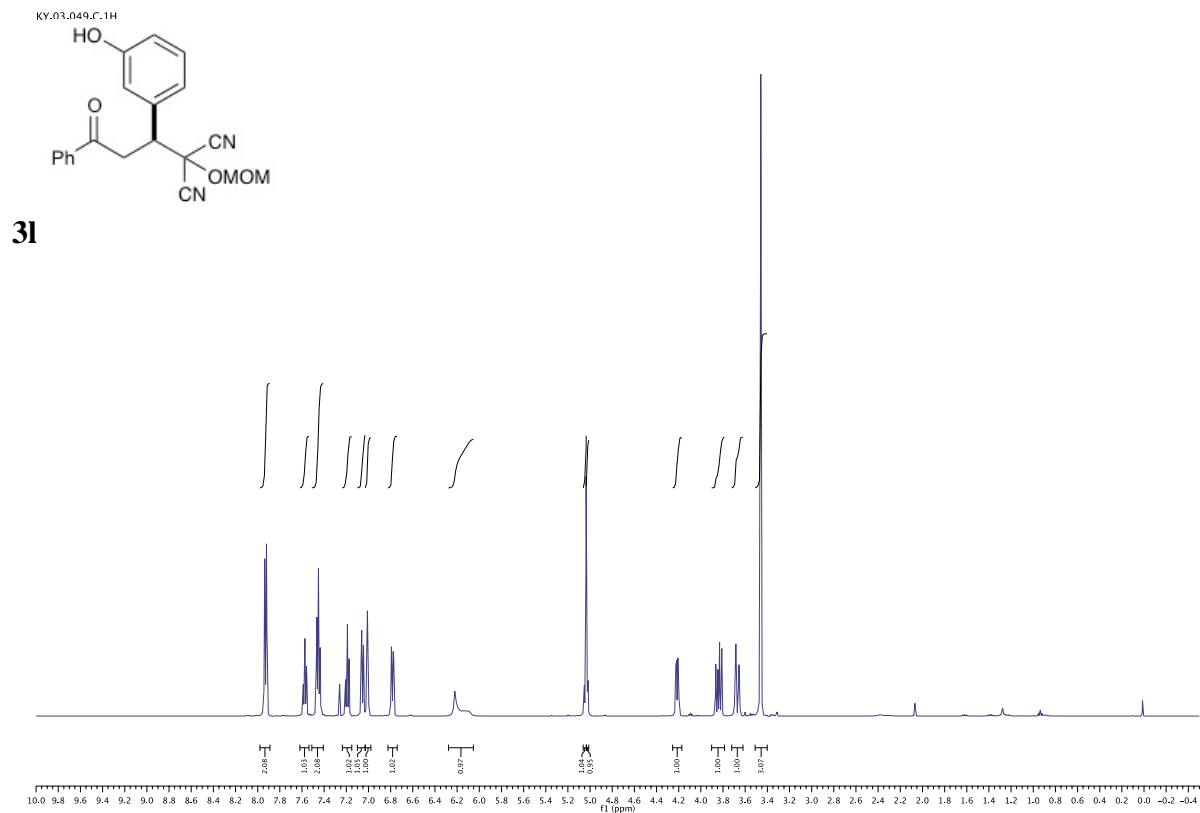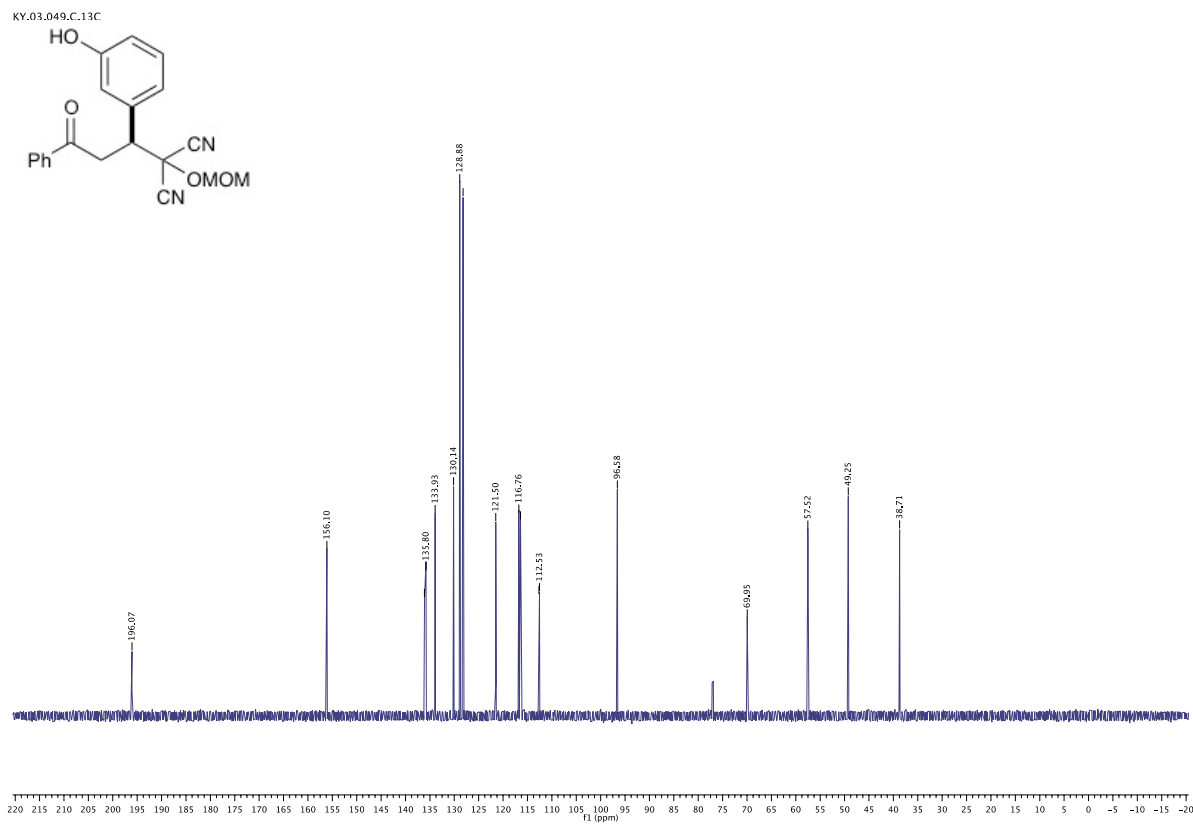

KY.03.047.C.1H

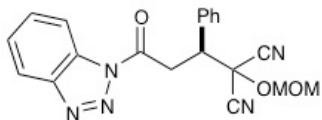

**3m**

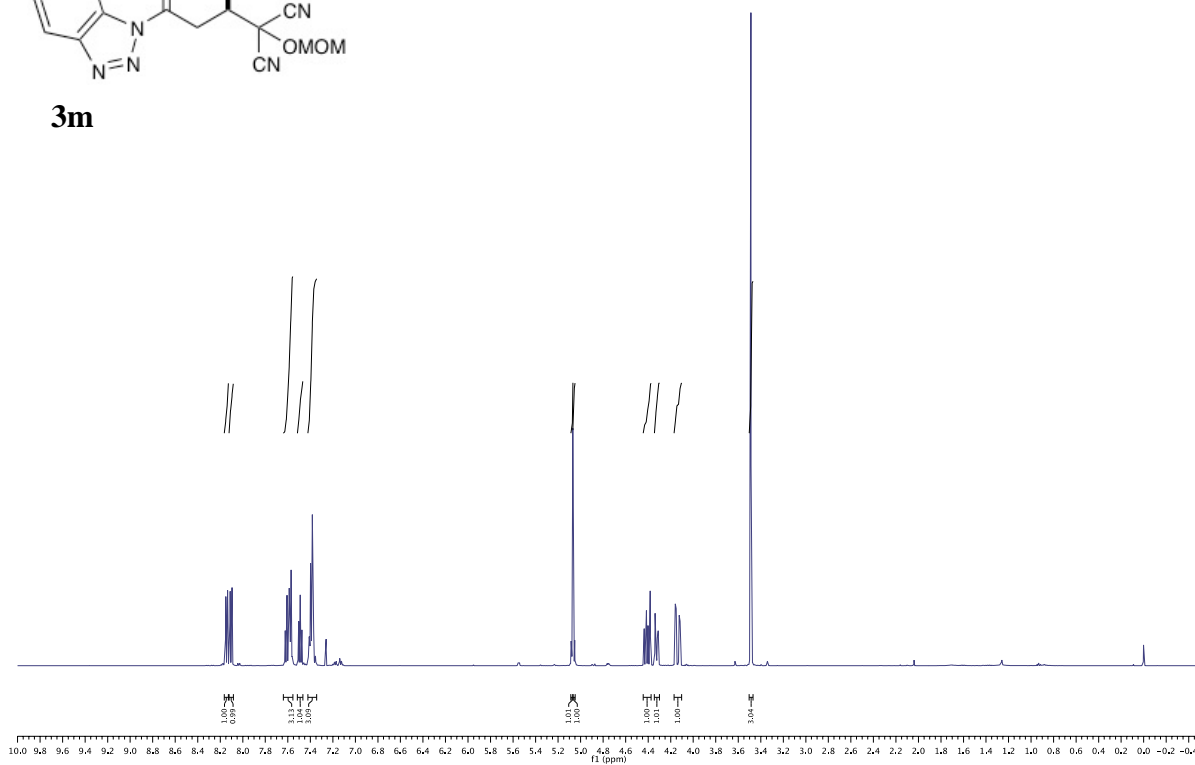

KY.03.047.C.13C

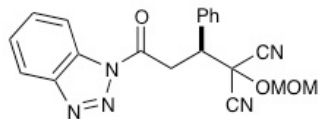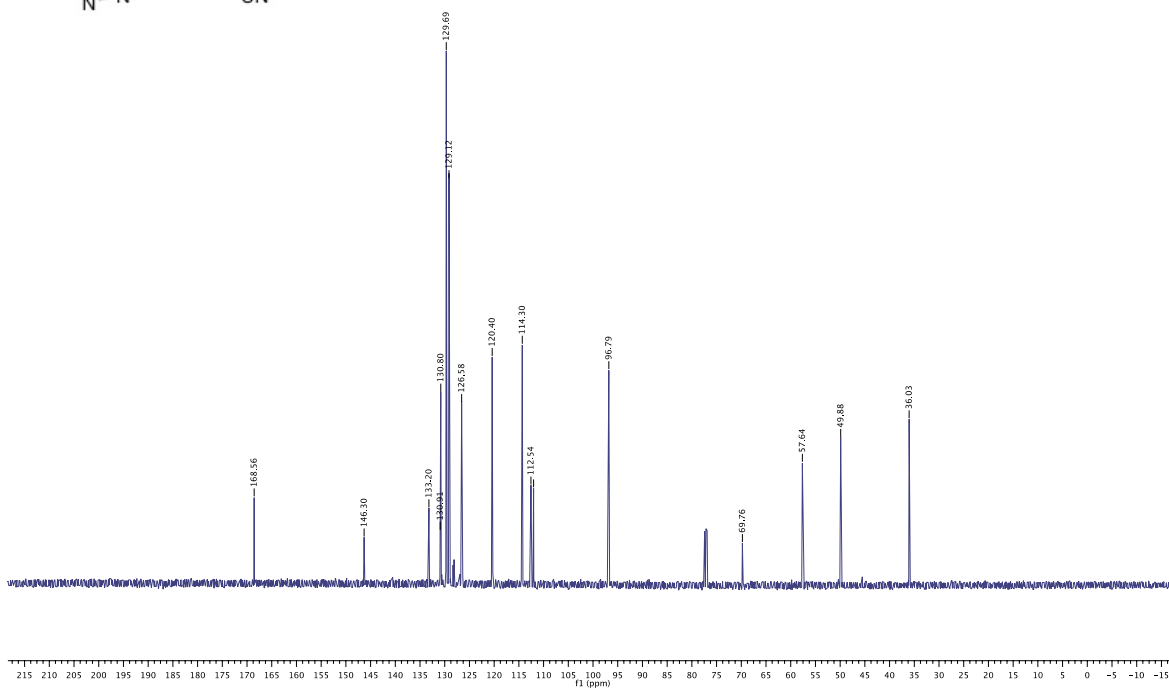

KY.02.269.Me.1H

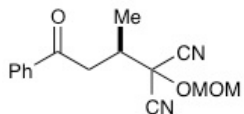**3n**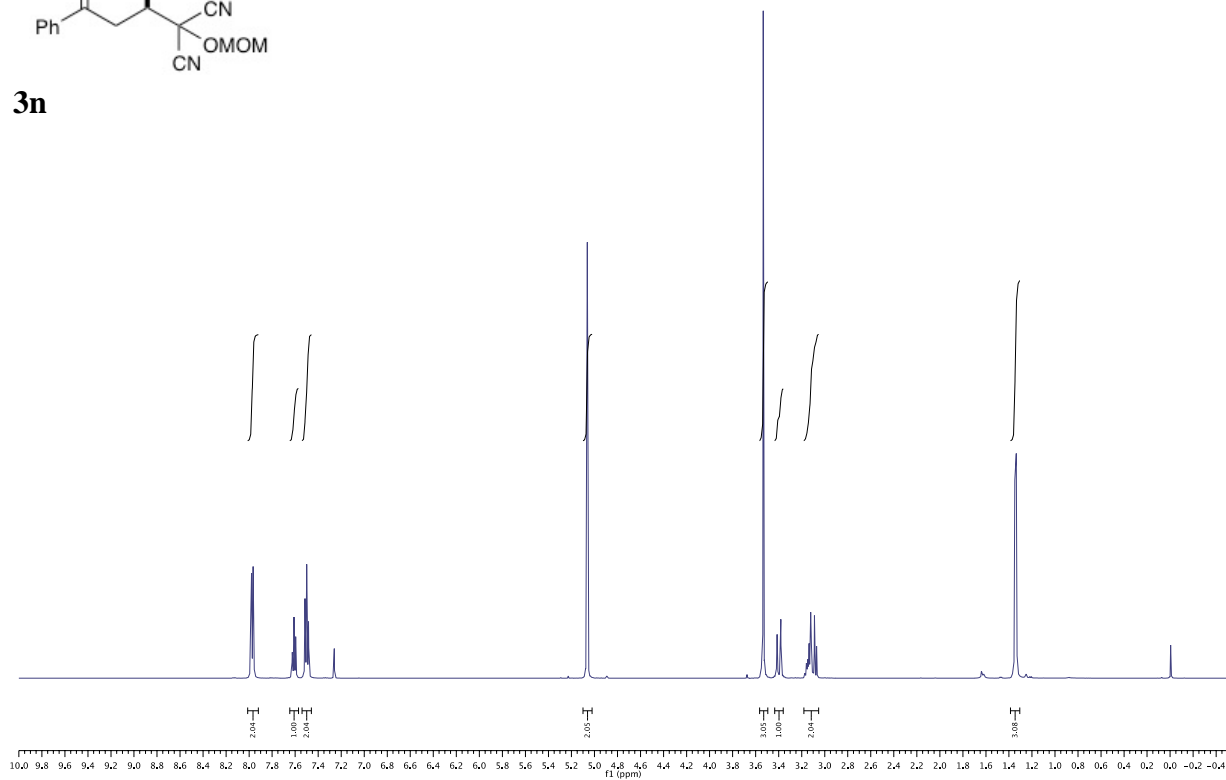

KY.02.269.Me.13C

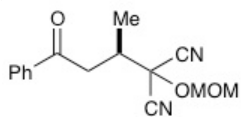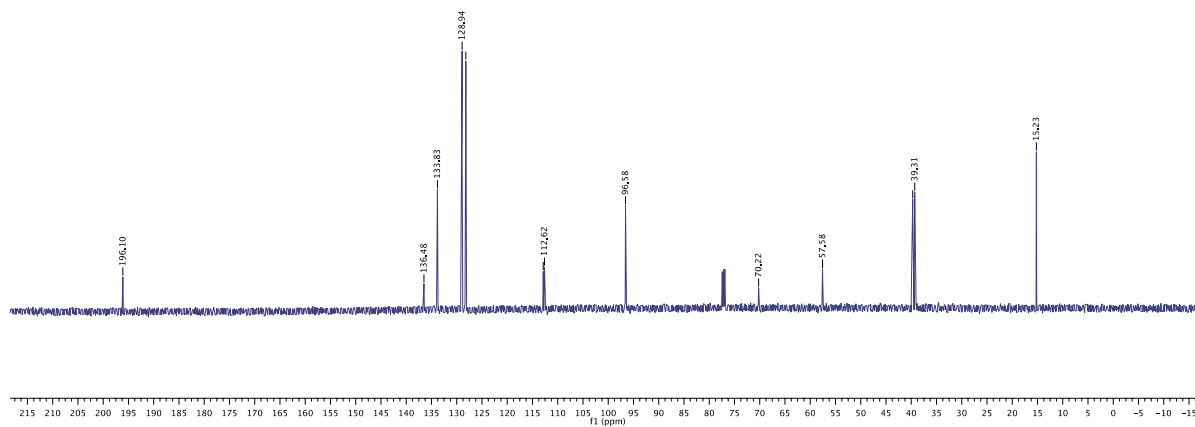

KY.03.038.A.1H

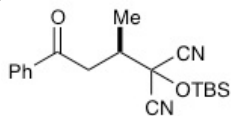**5n**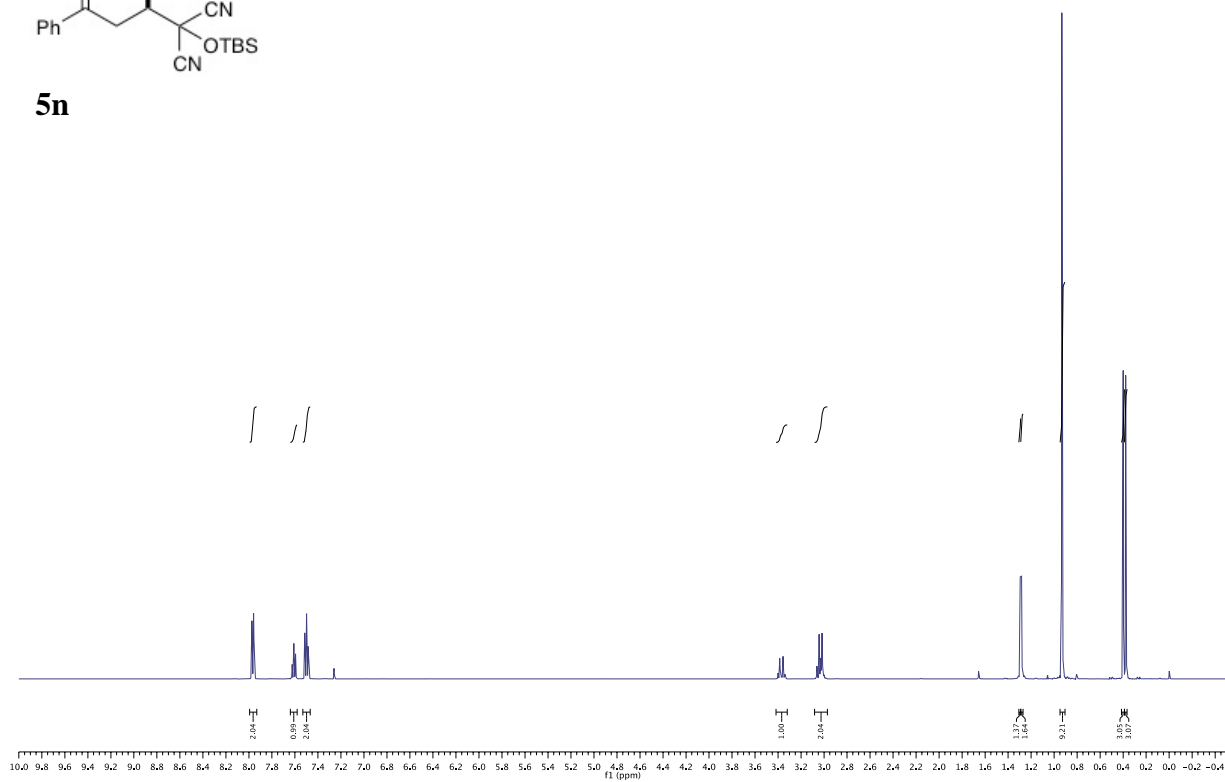

KY.03.038.A.13C

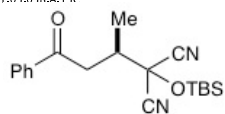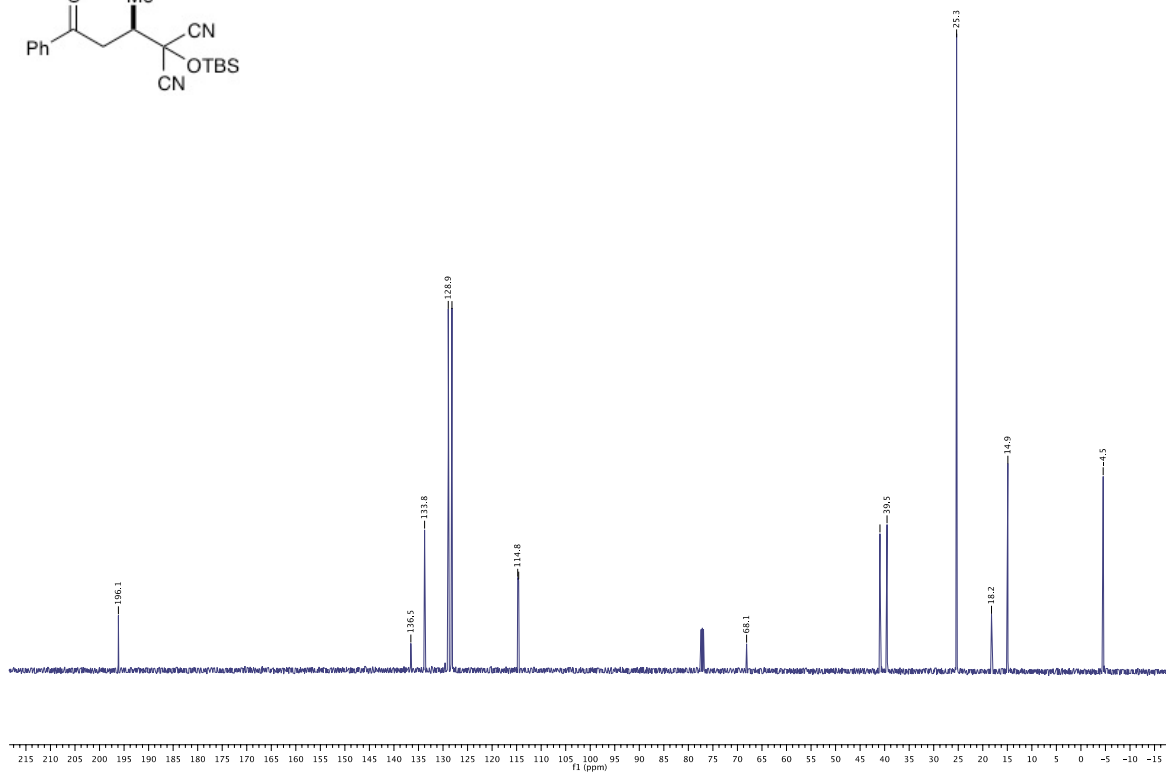

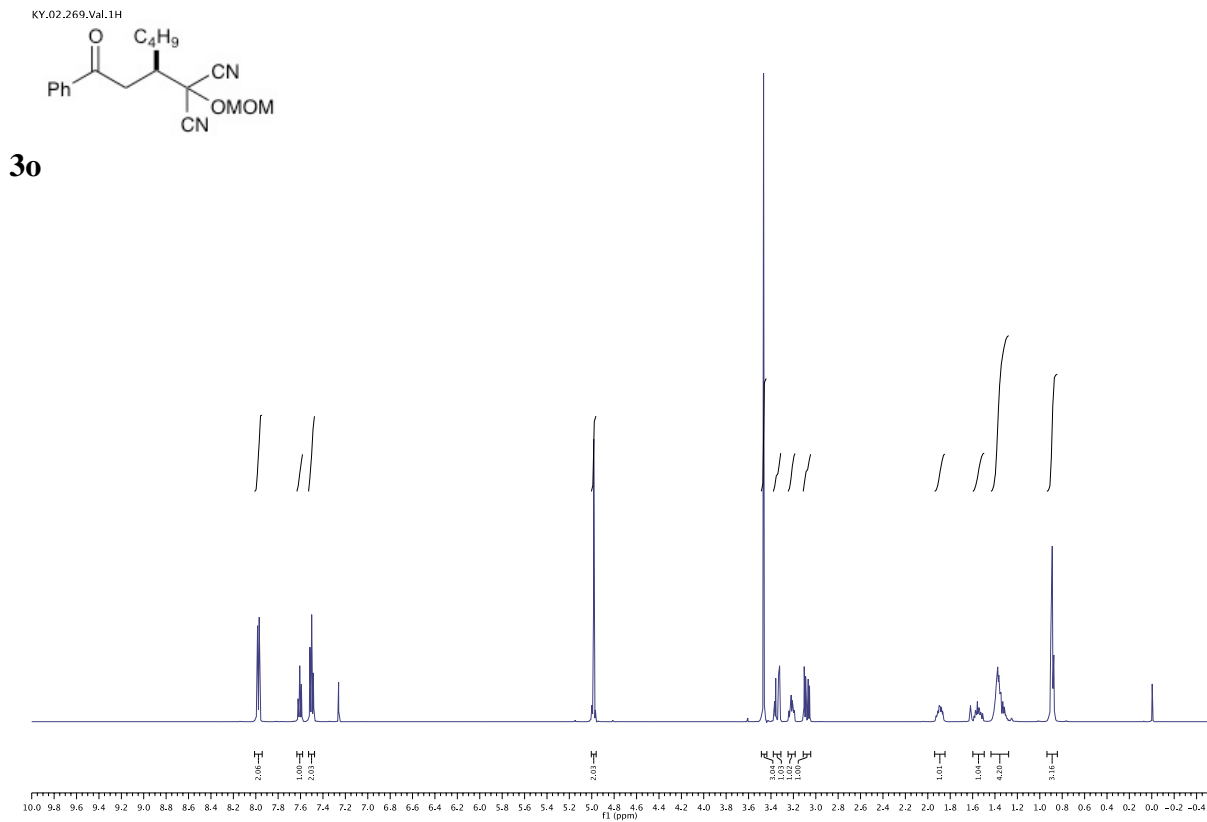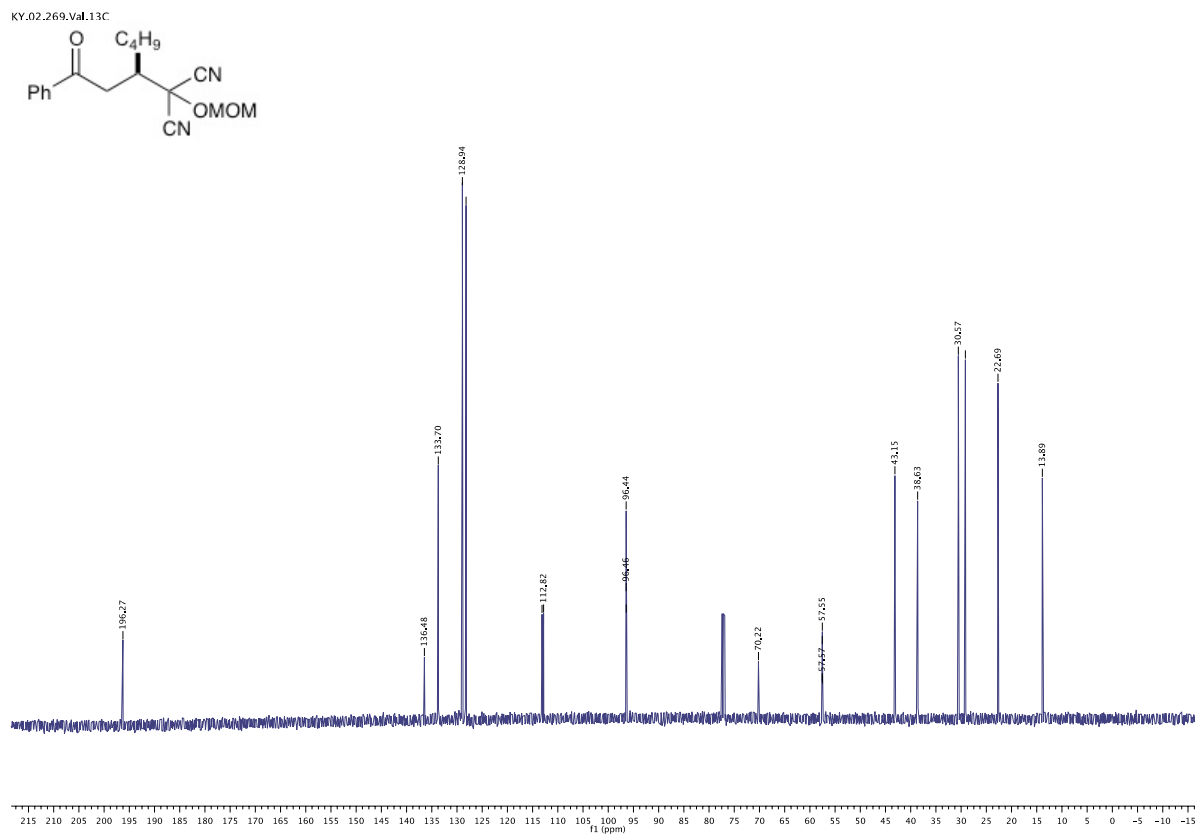

KY.02.261.R.1H

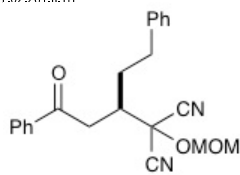**3p**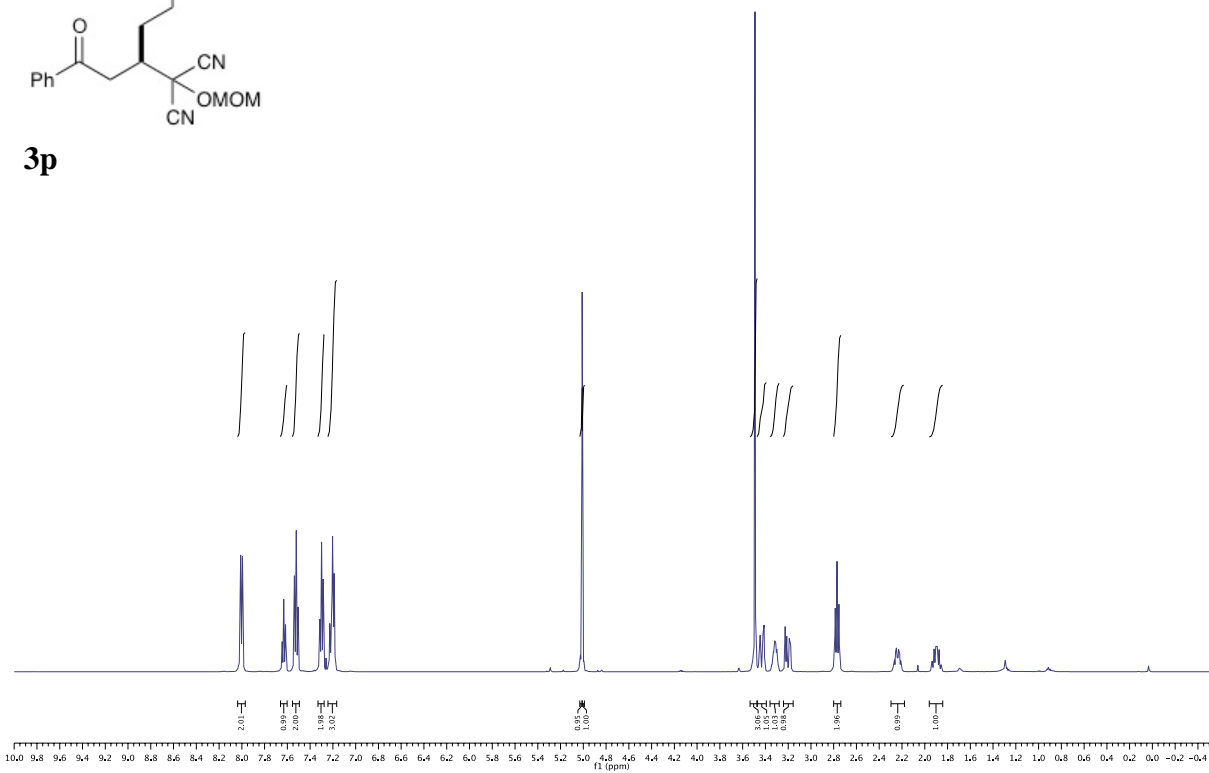

KY.02.261.B.13C

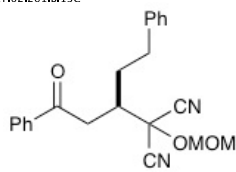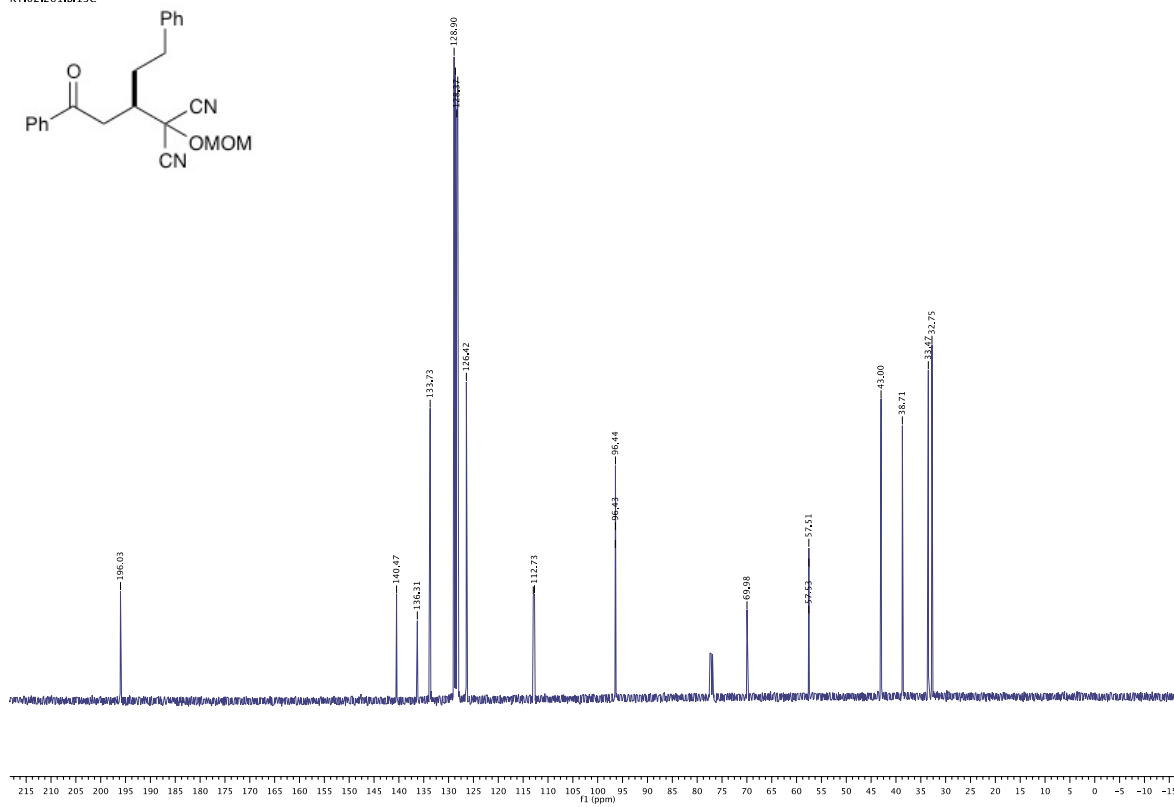



KY.03.034.A.1H

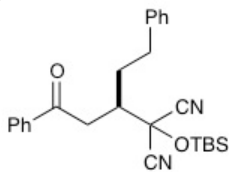

5p

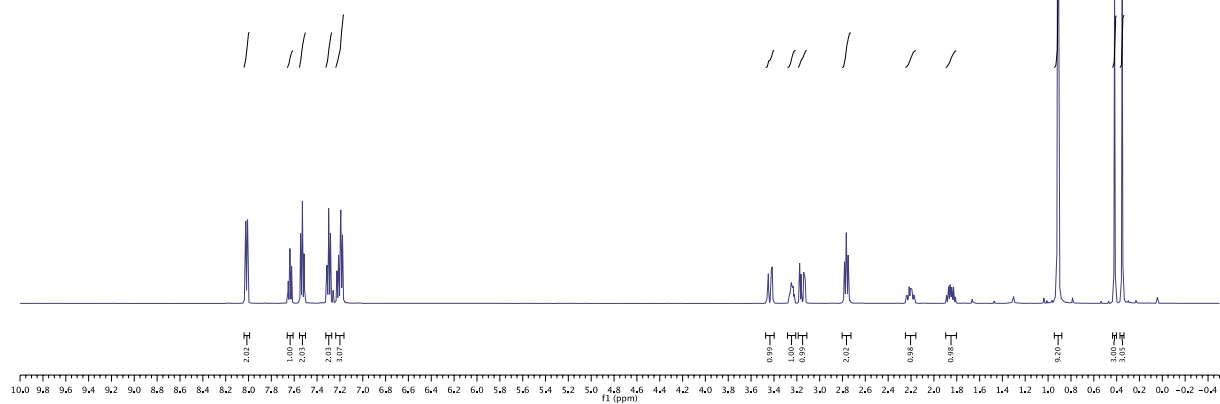

KY.03.034.A.13C

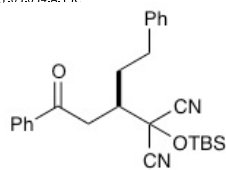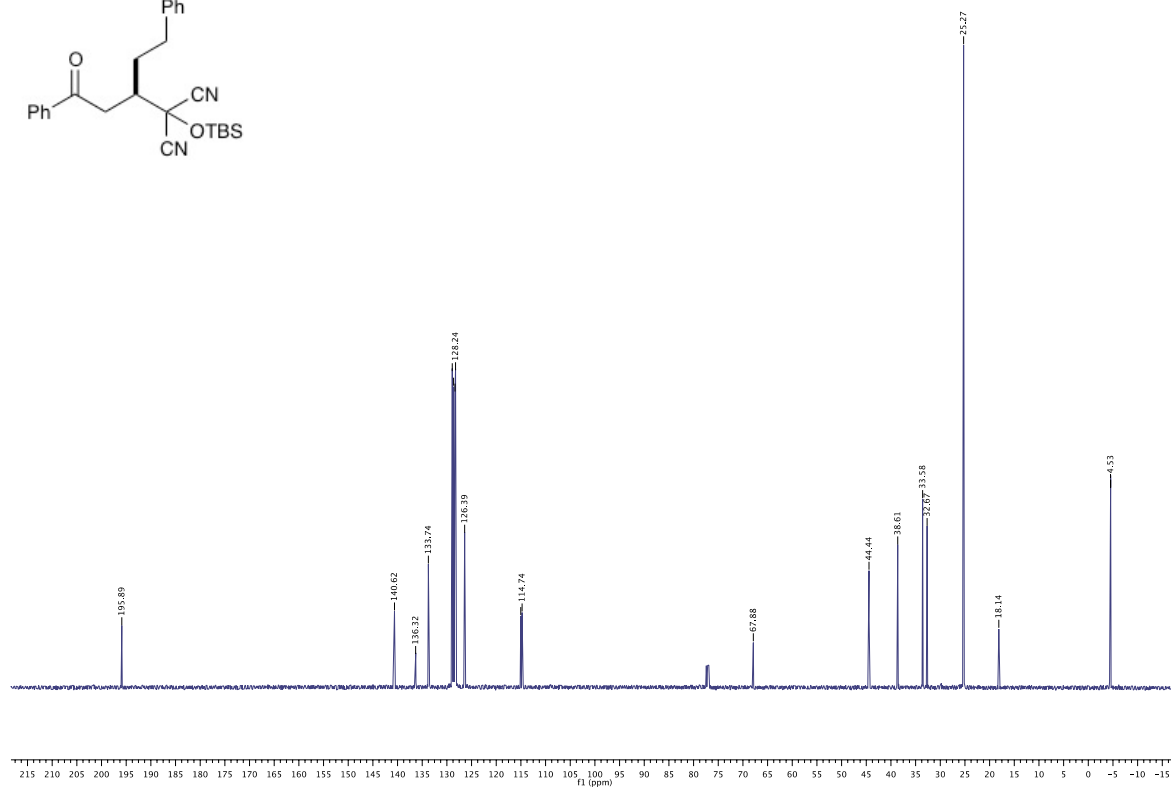

KY.03.049.A.1H

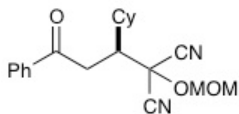

**3q**

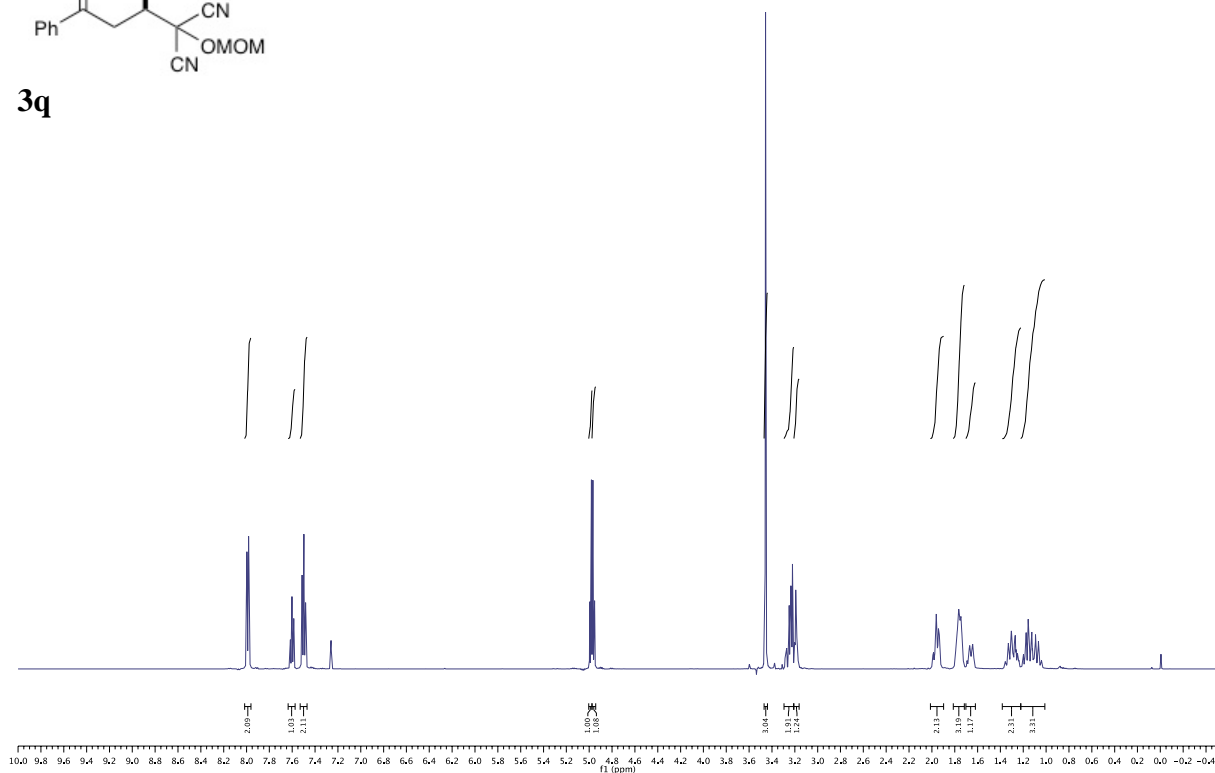

KY.03.049.A.13C

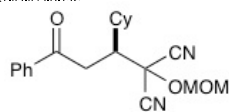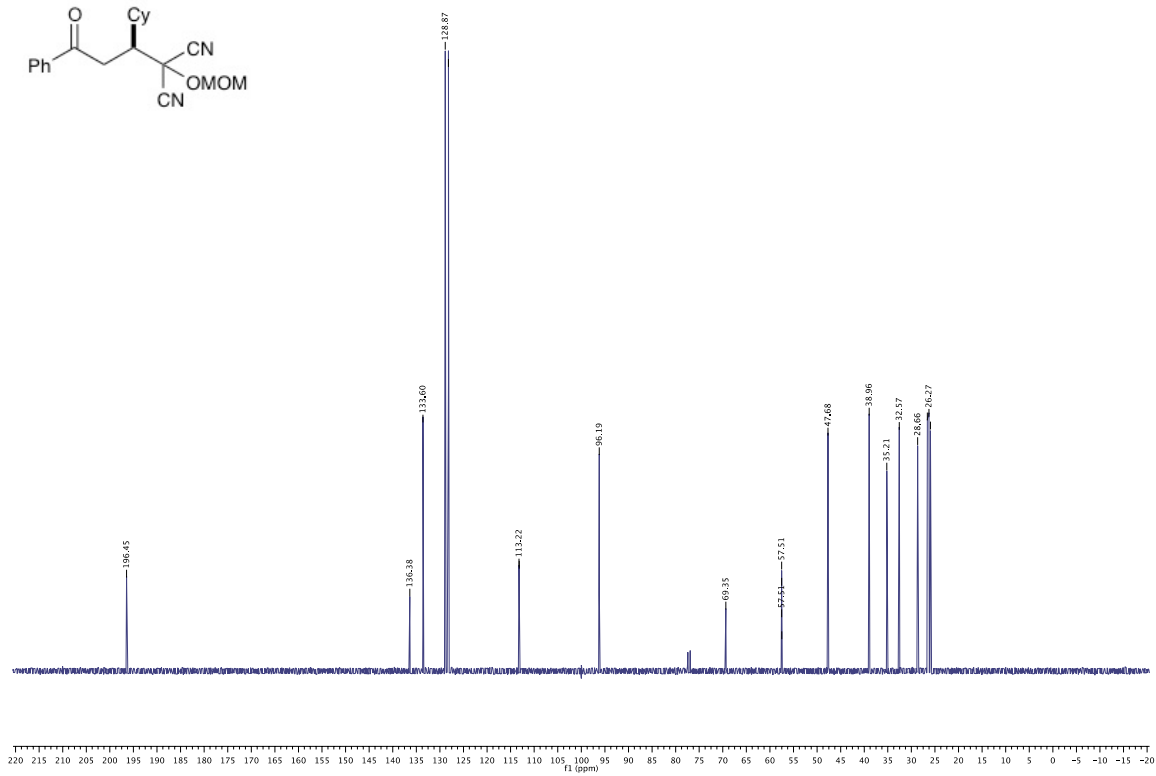

KY.02.261.A.1H

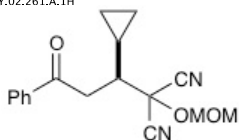

**3r**

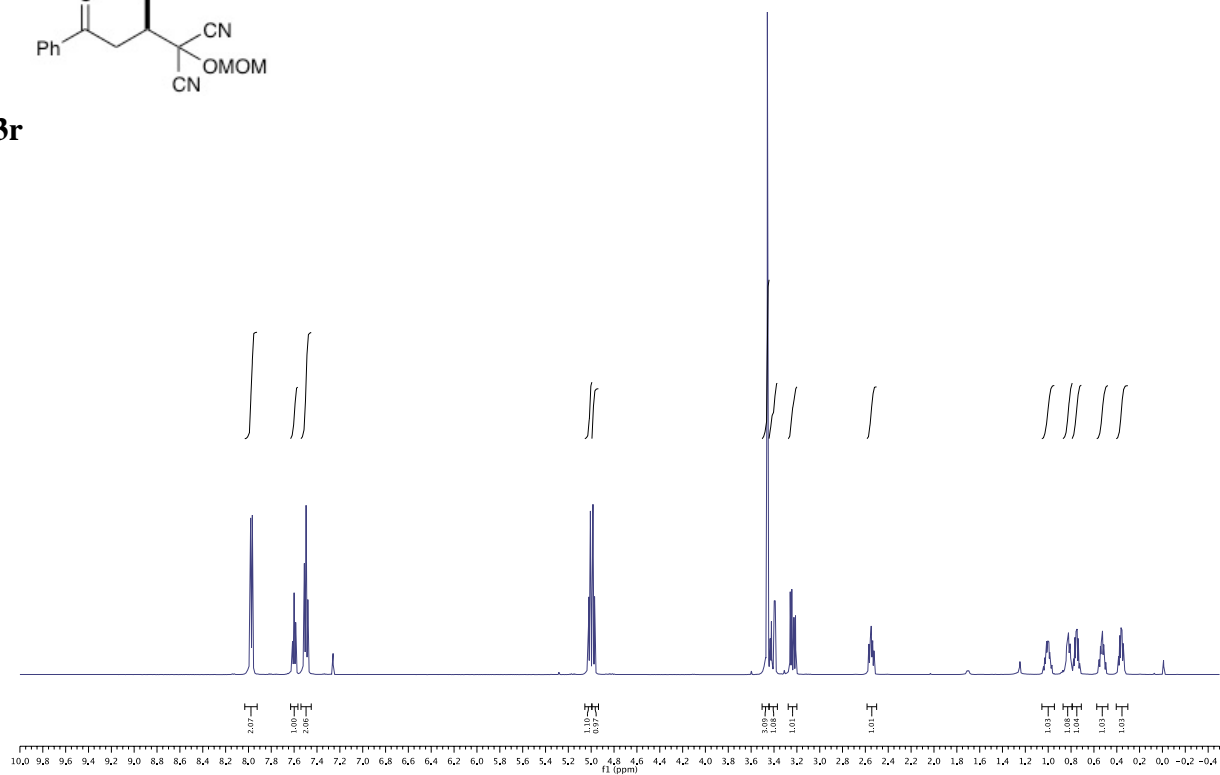

KY.02.261.A.13C

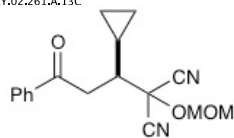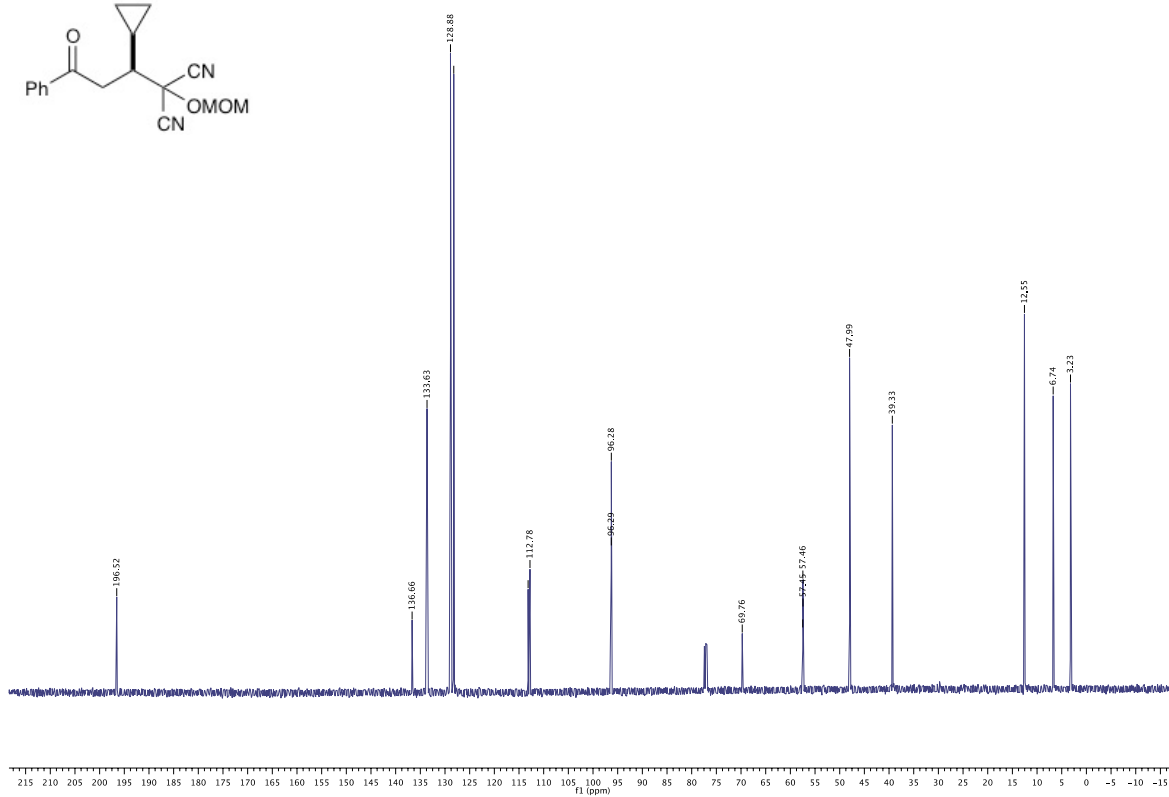

KY.03.046.B.1H

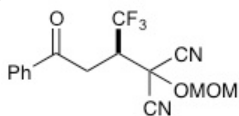

**3s**

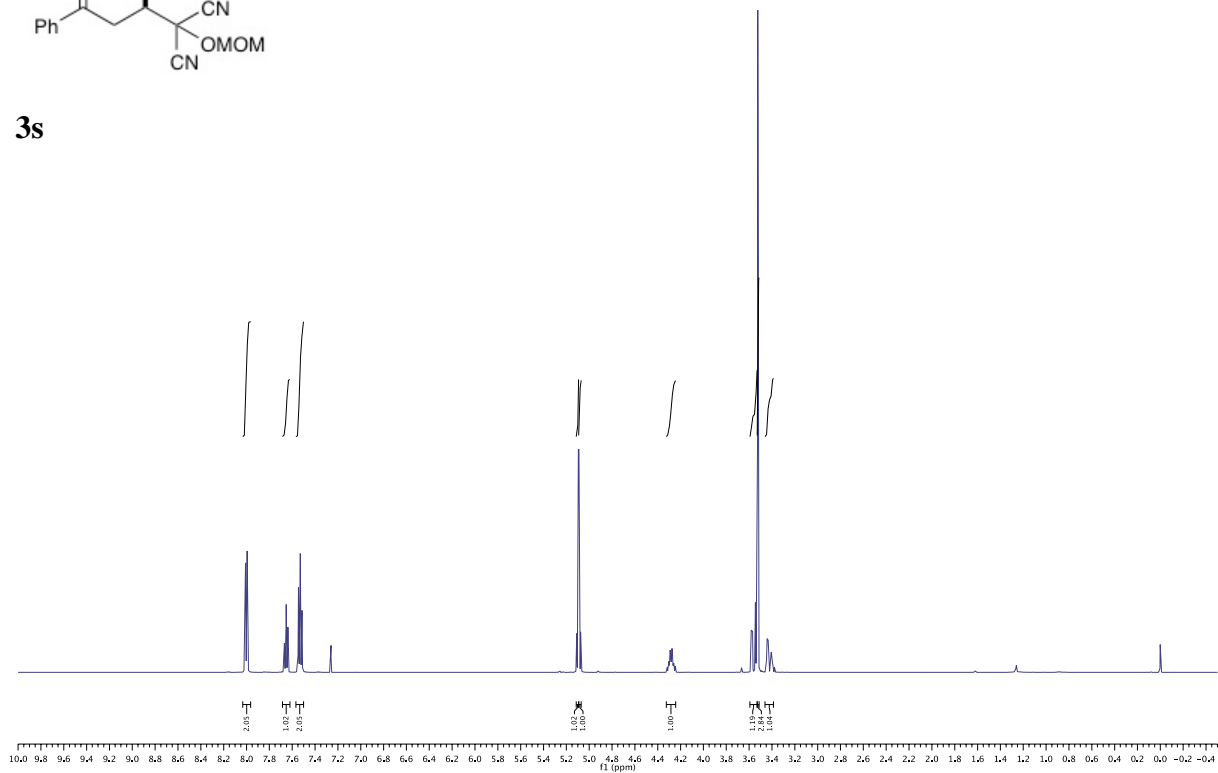

KY.03.046.B.13C

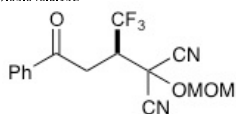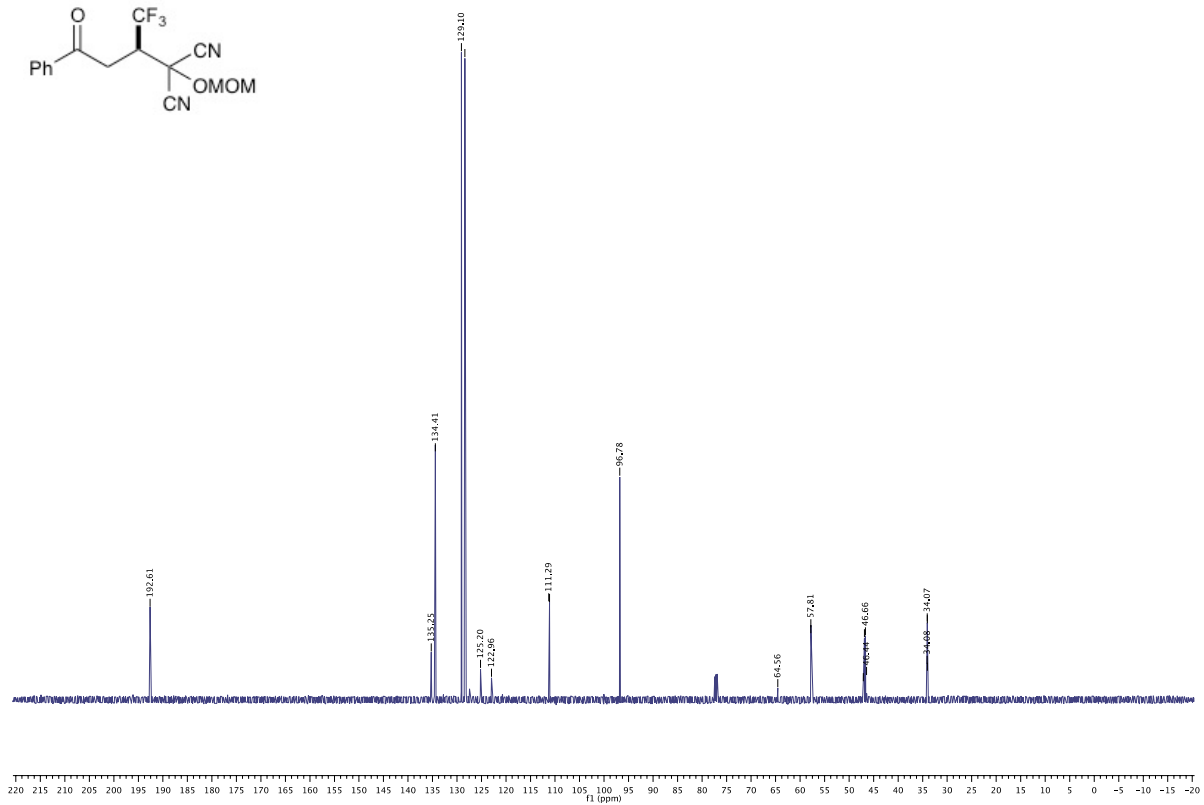

KY.03.034.R.1H.7

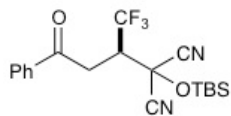

5s

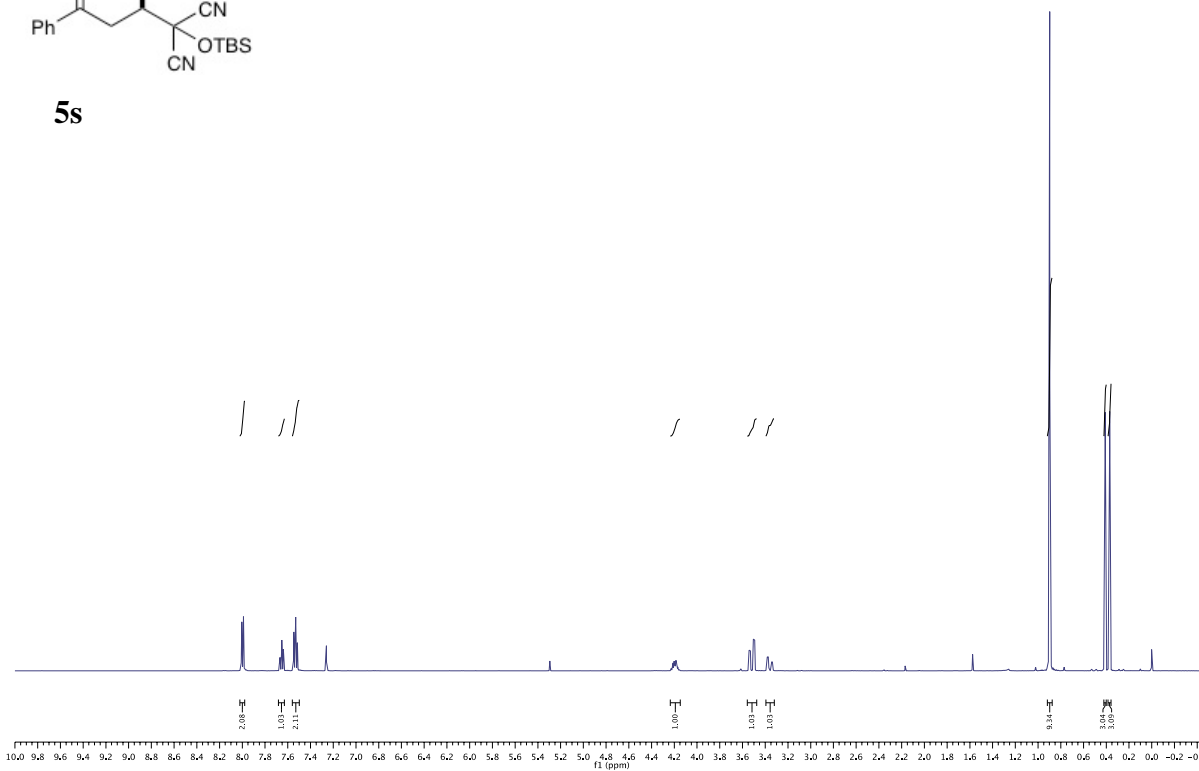

KY.03.034.B.13C.2

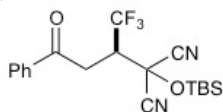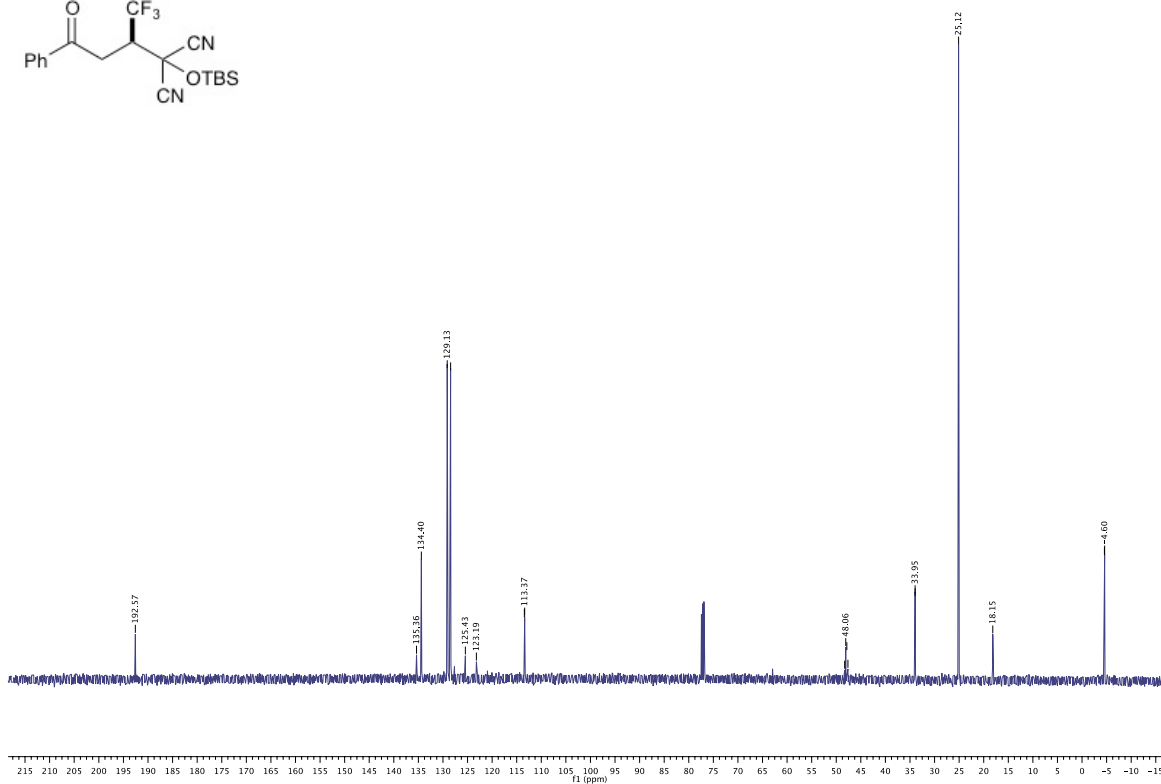

## Functionalization of 5a (from TBS MAC)

KY.03.029.1H

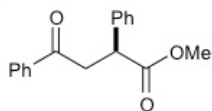**7**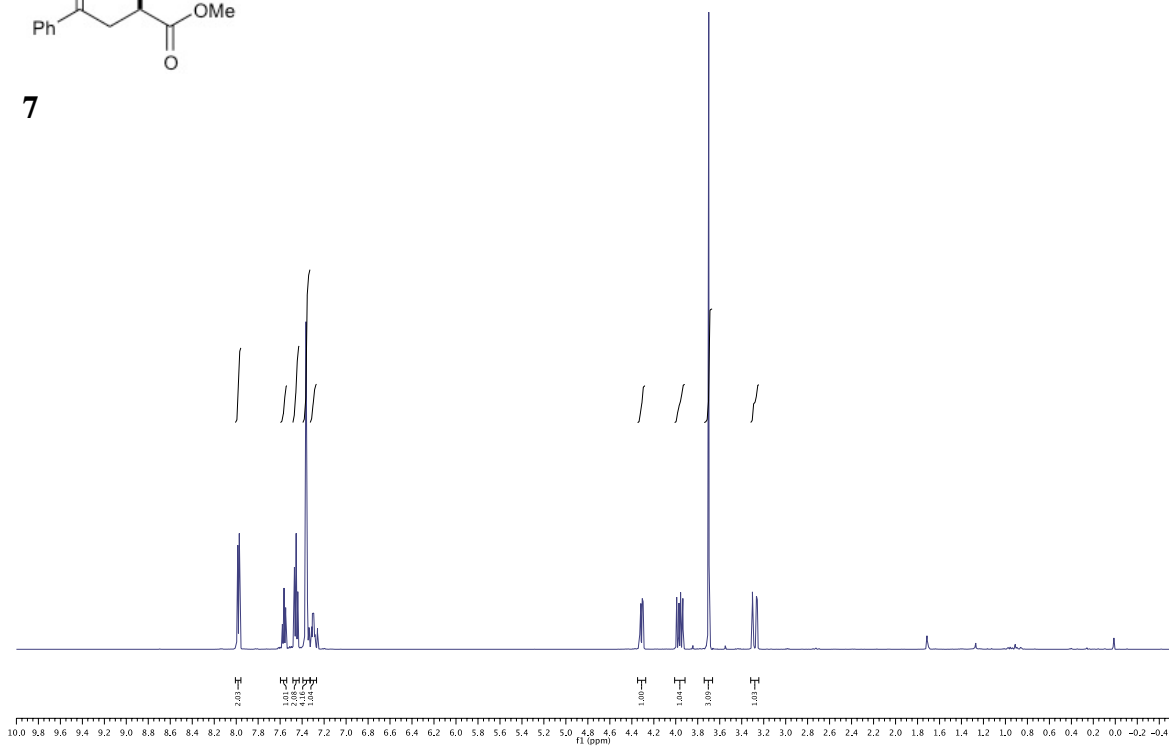

KY.03.029.13C

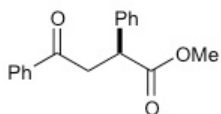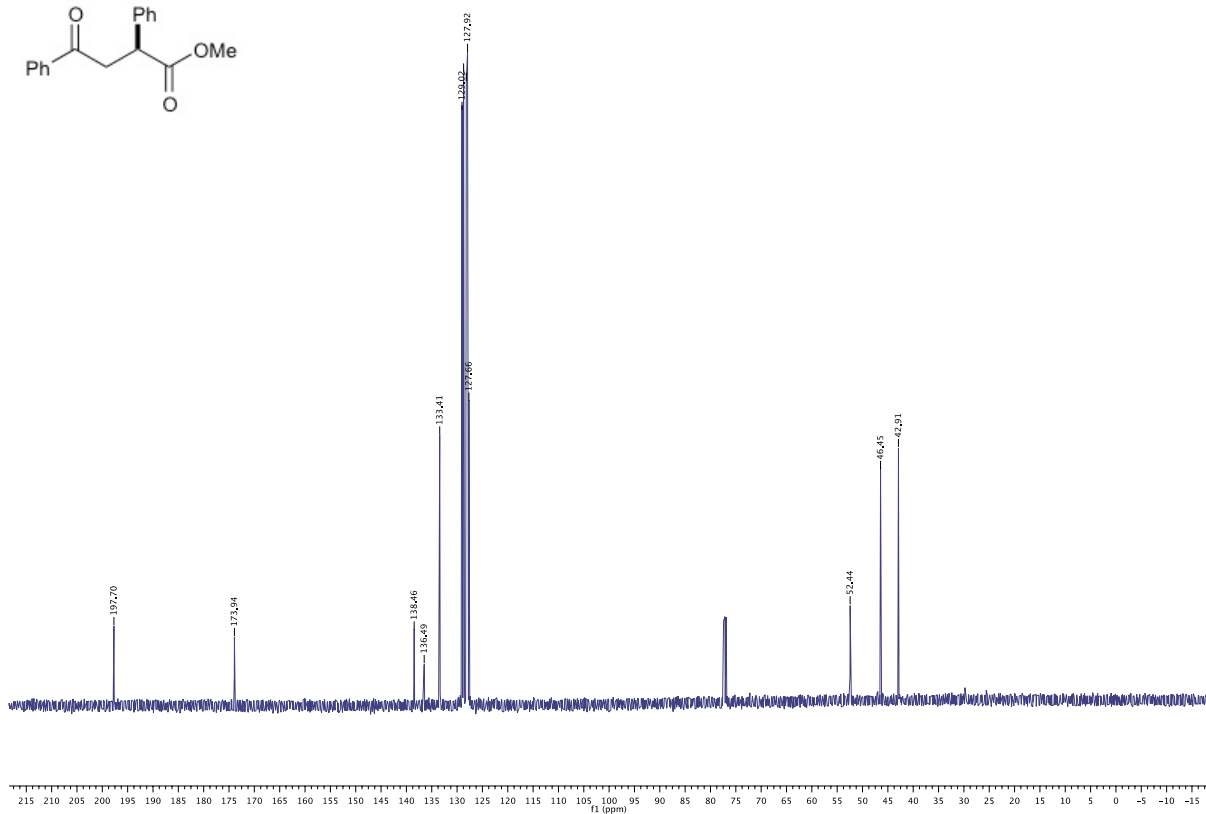

KY.03.055.1H

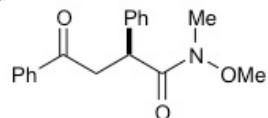

**10**

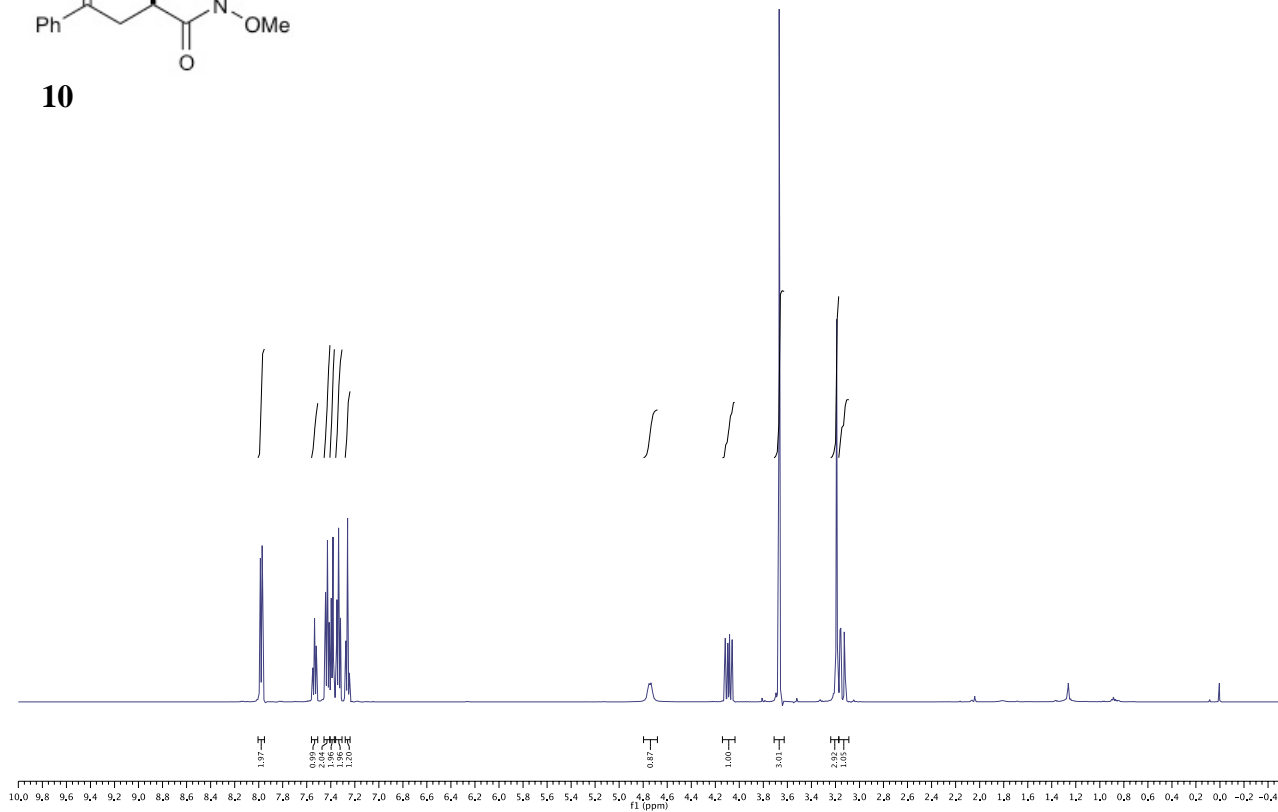

KY.03.055.13C

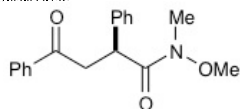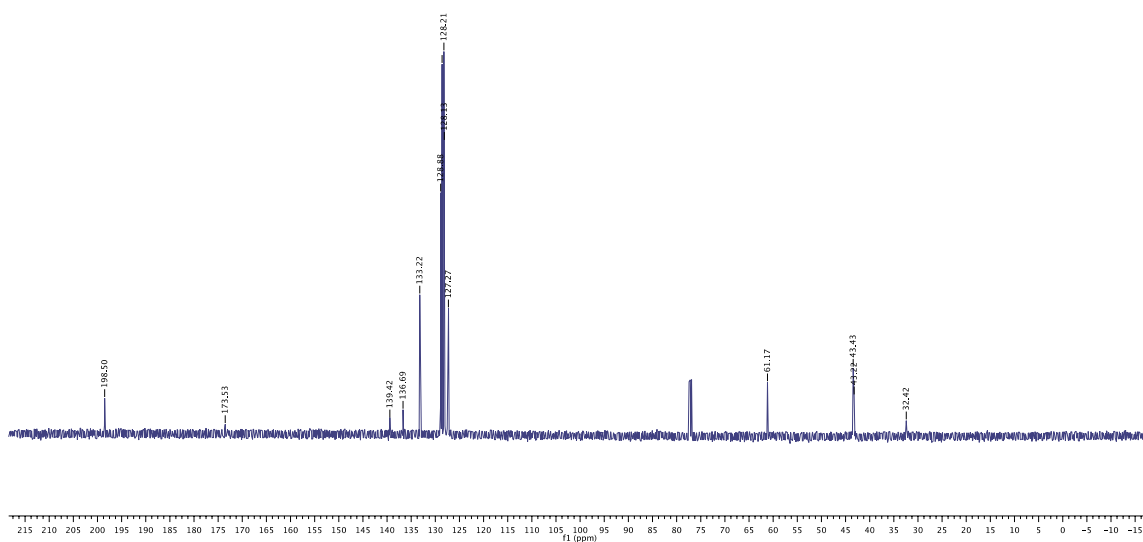

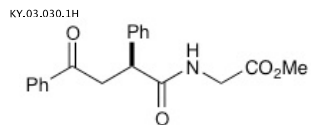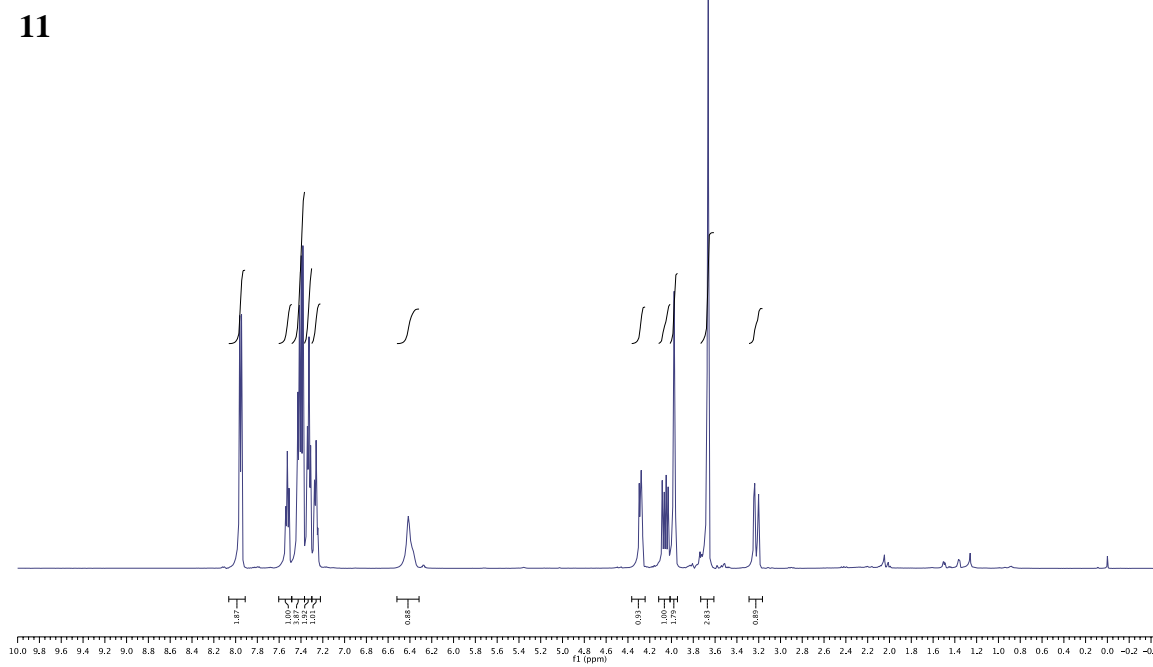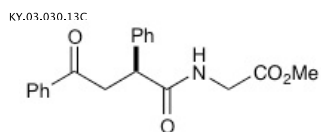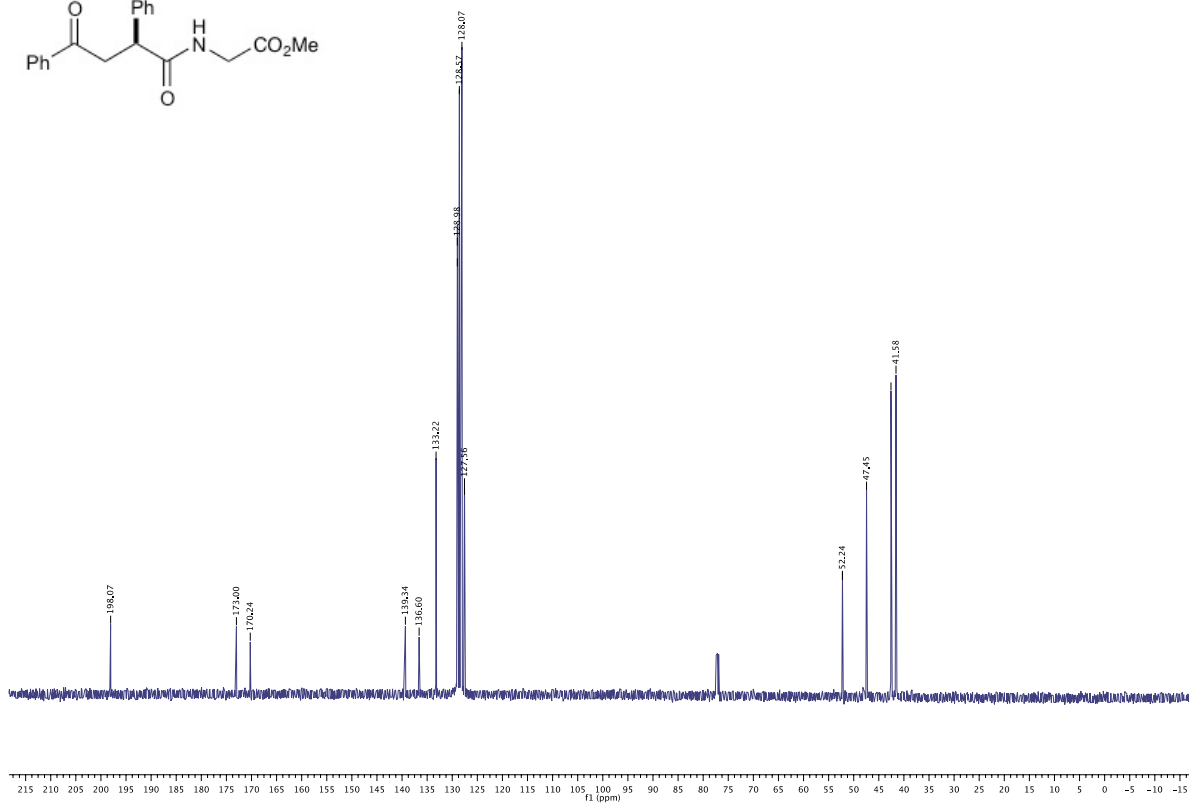



## Functionalization of 3a (from MOM MAC)

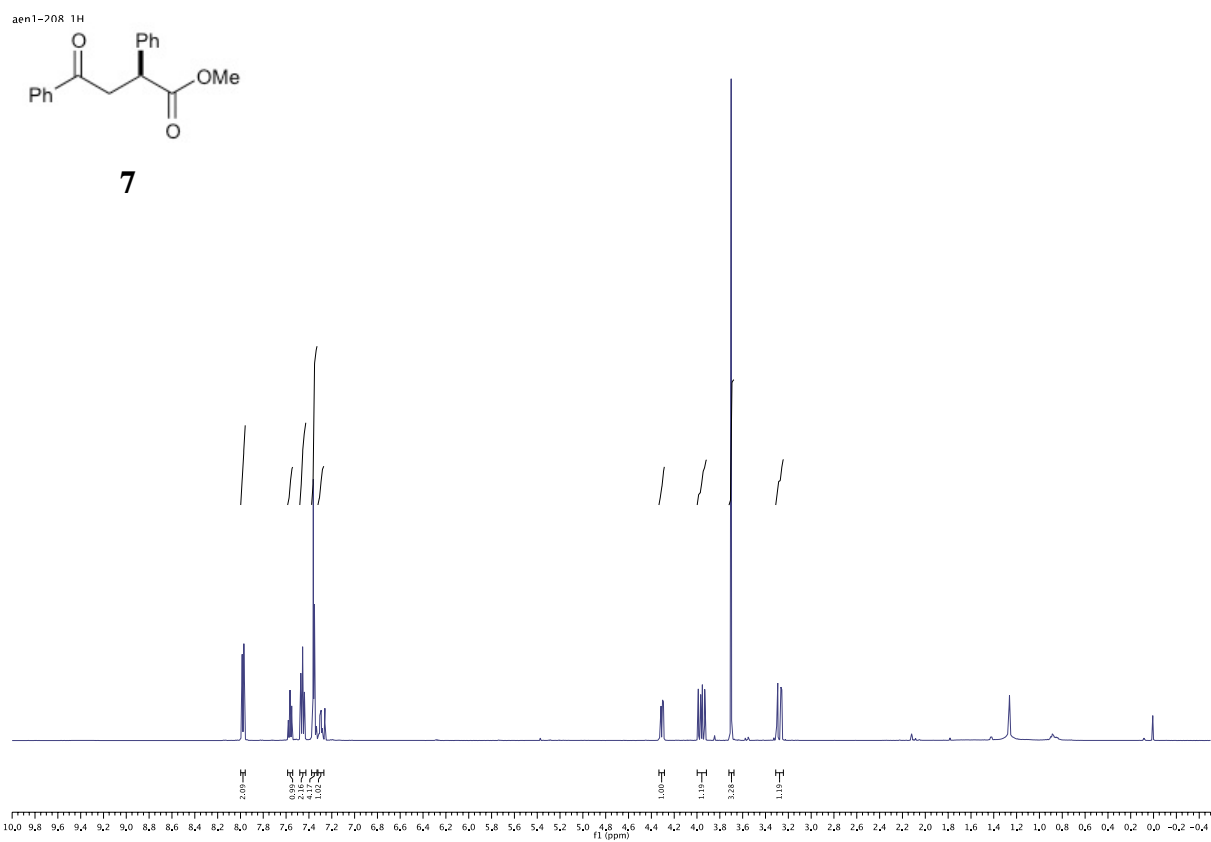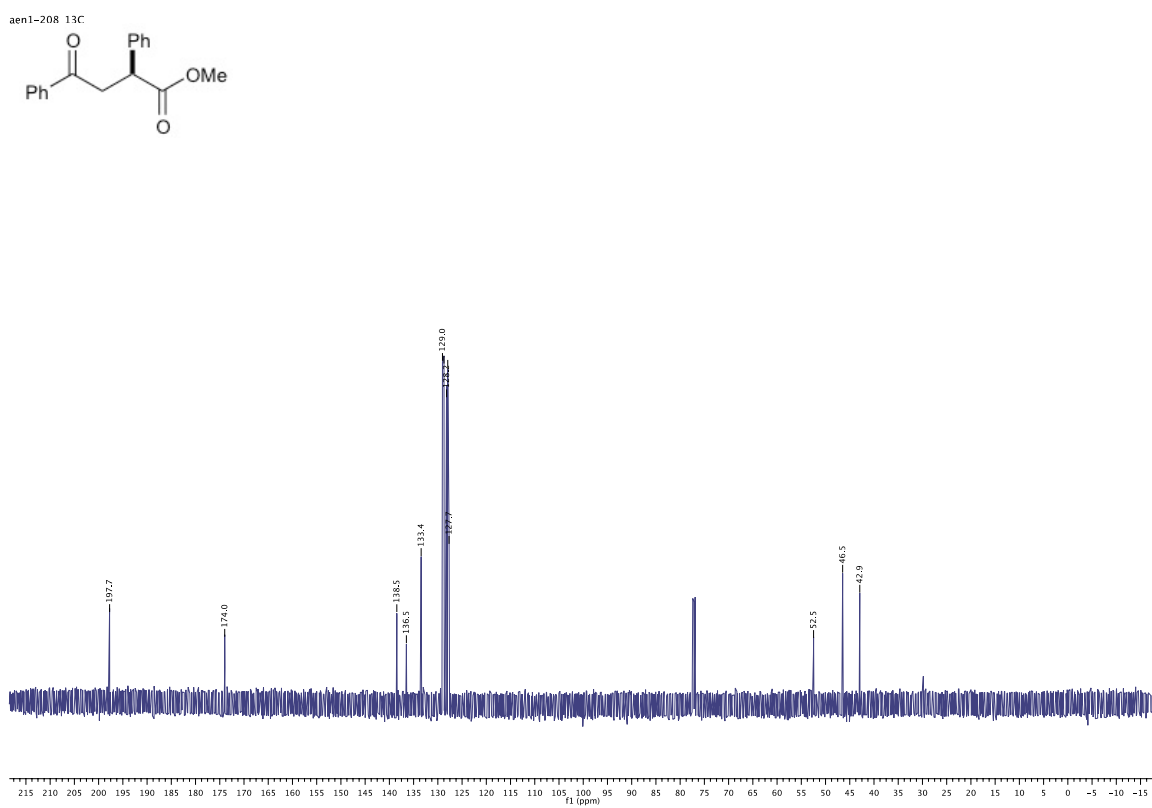

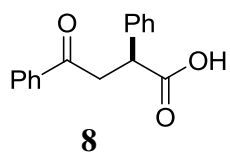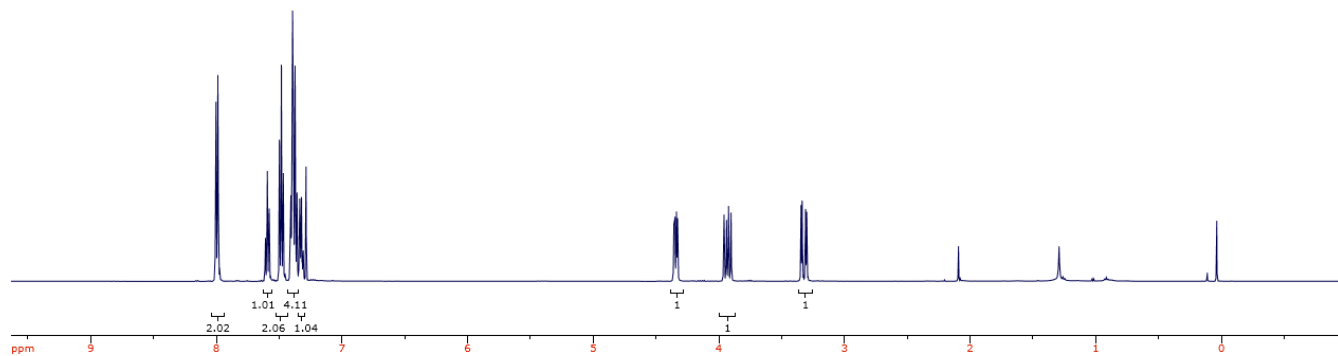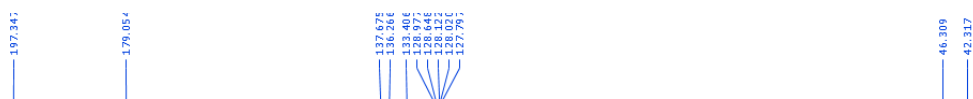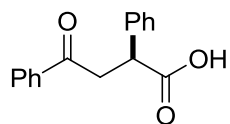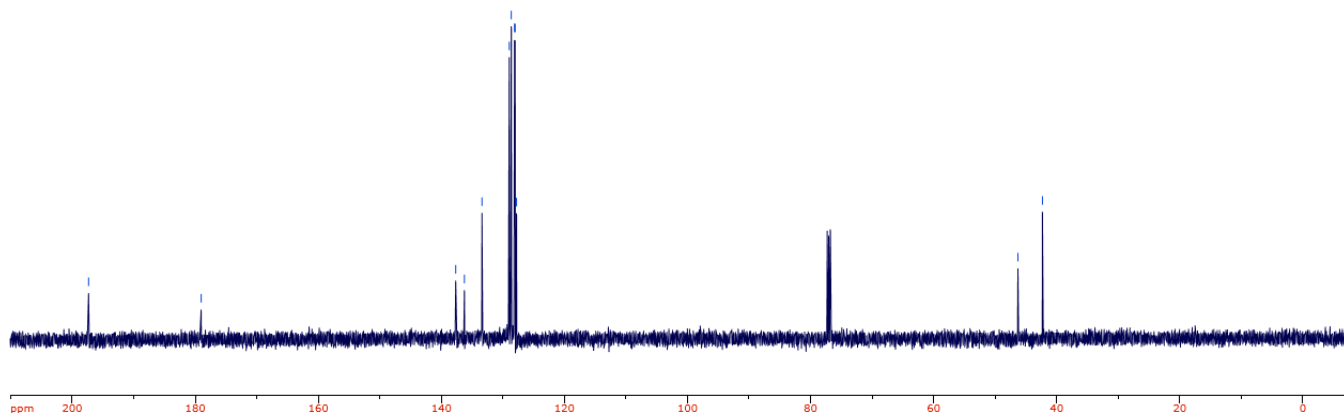

aen1-207 1H

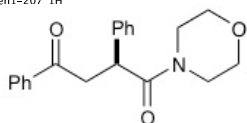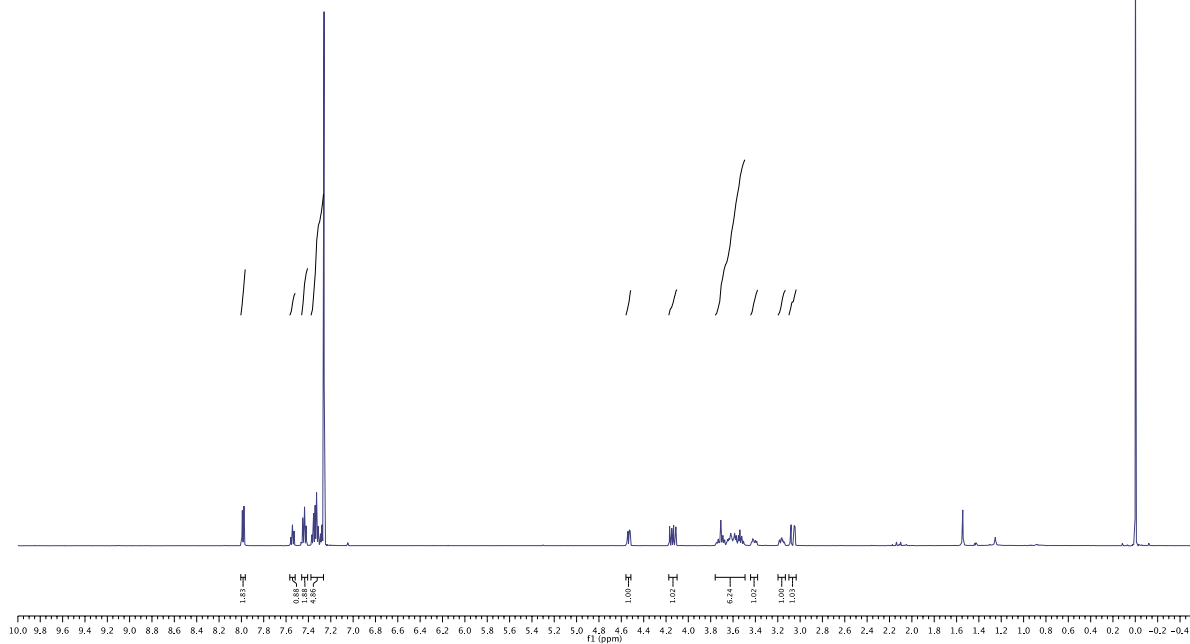

aen1-207 13C/1

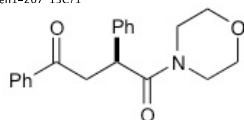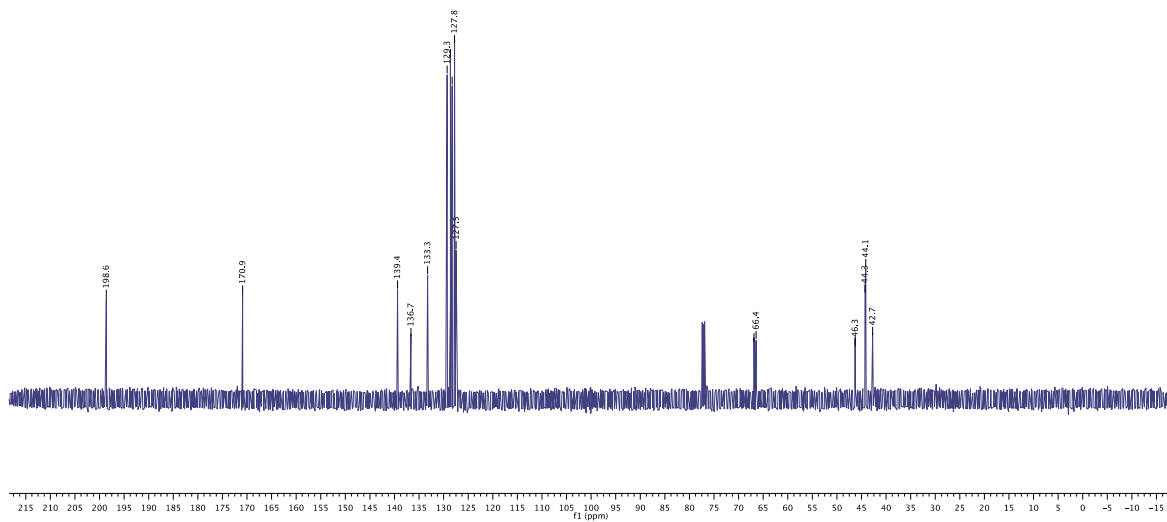

Synthesis of Succinic Diester from **3a**

KY.03.058.1H

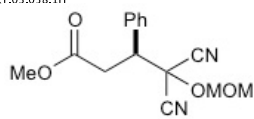**12**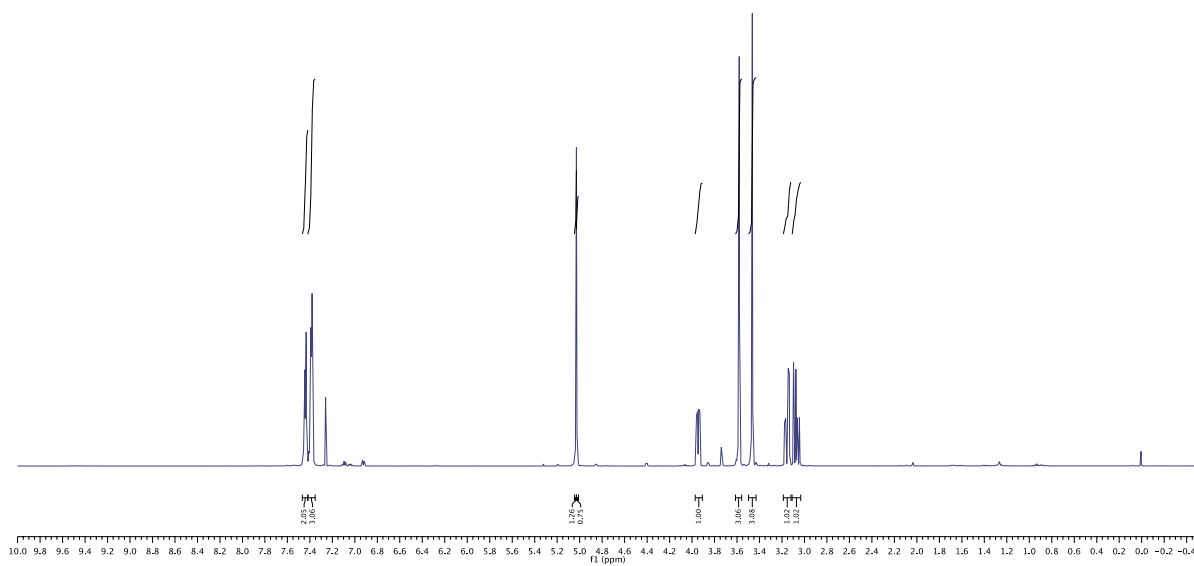

KY.03.058.13C

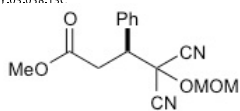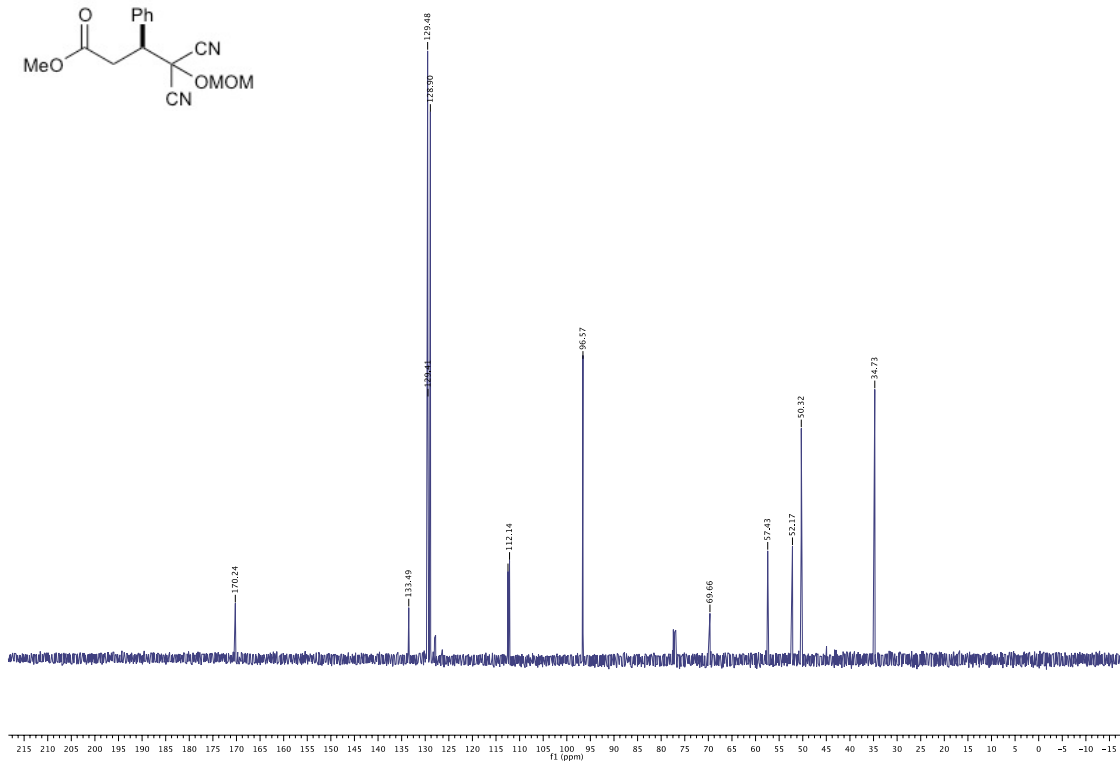

KY.03.063.pure.1H

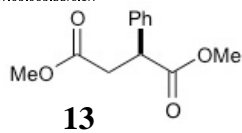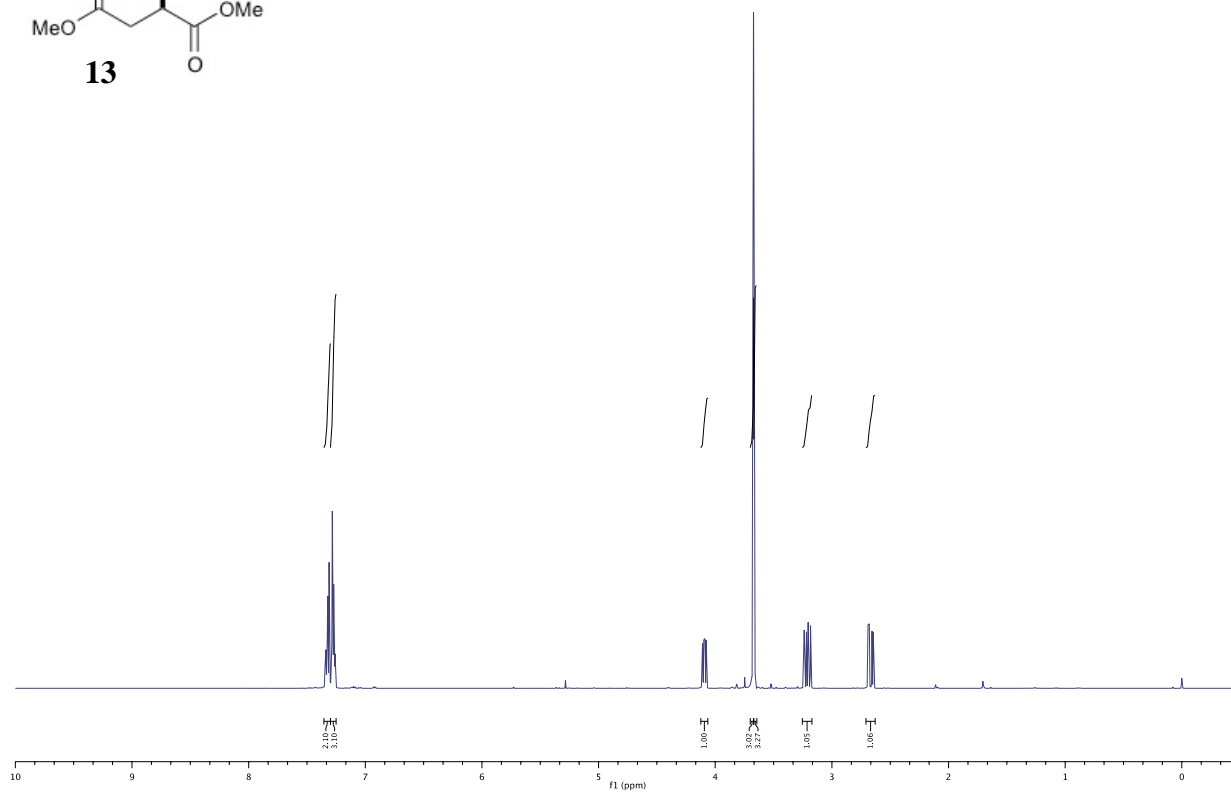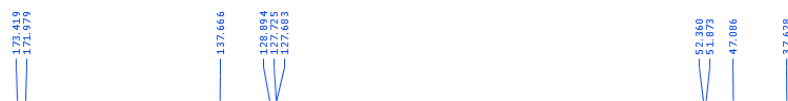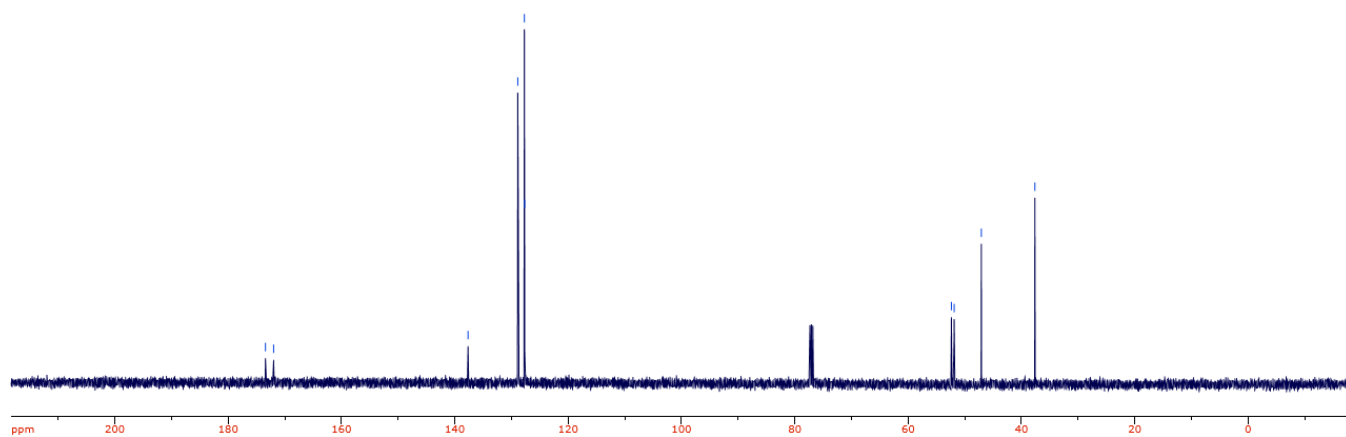

## Total Synthesis of Fornicin C

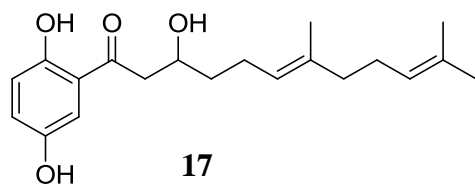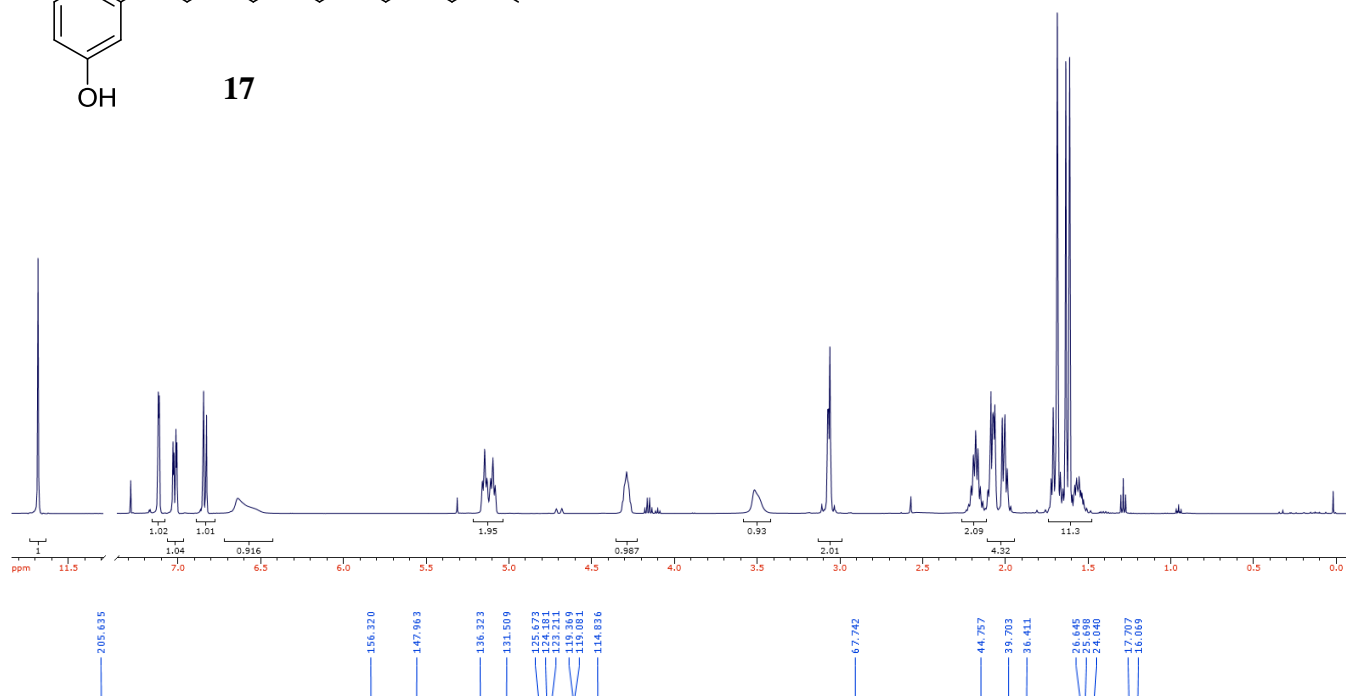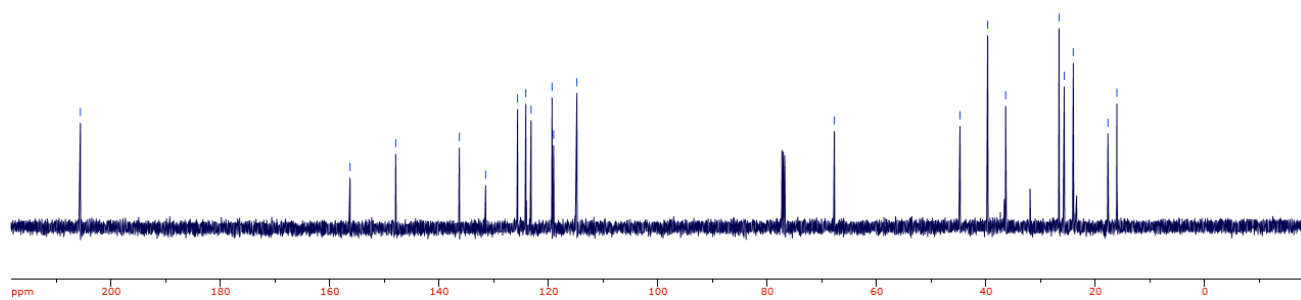

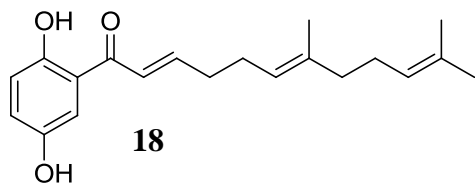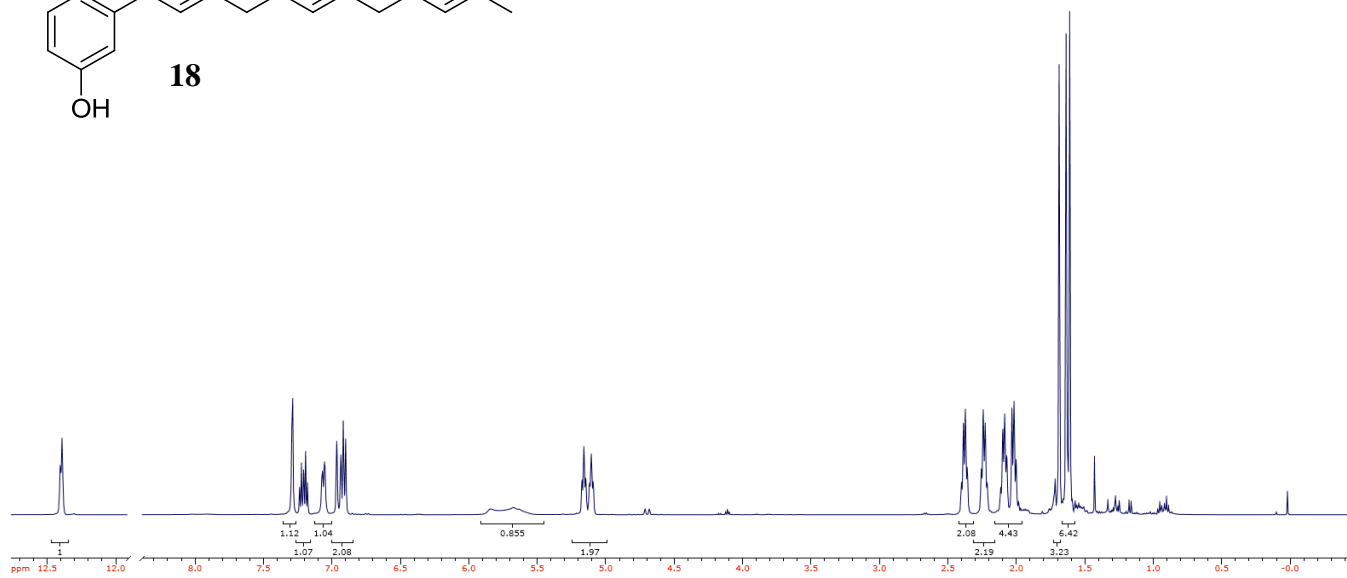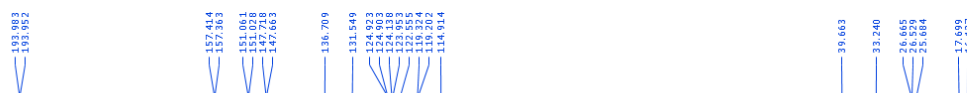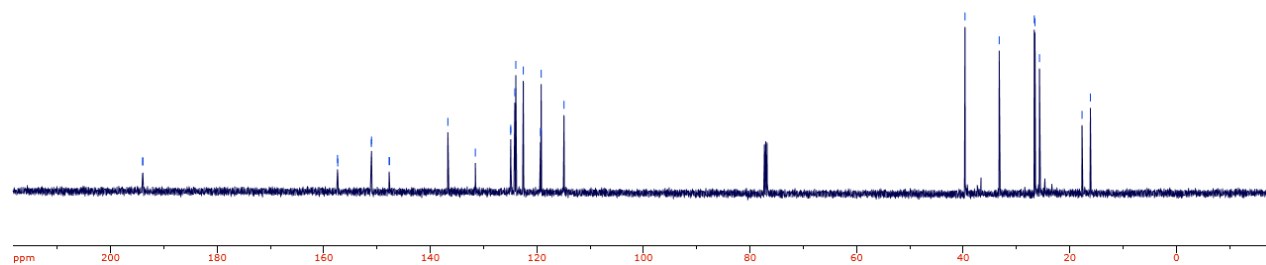

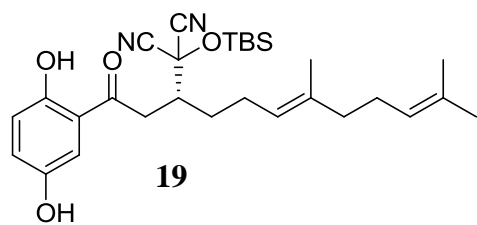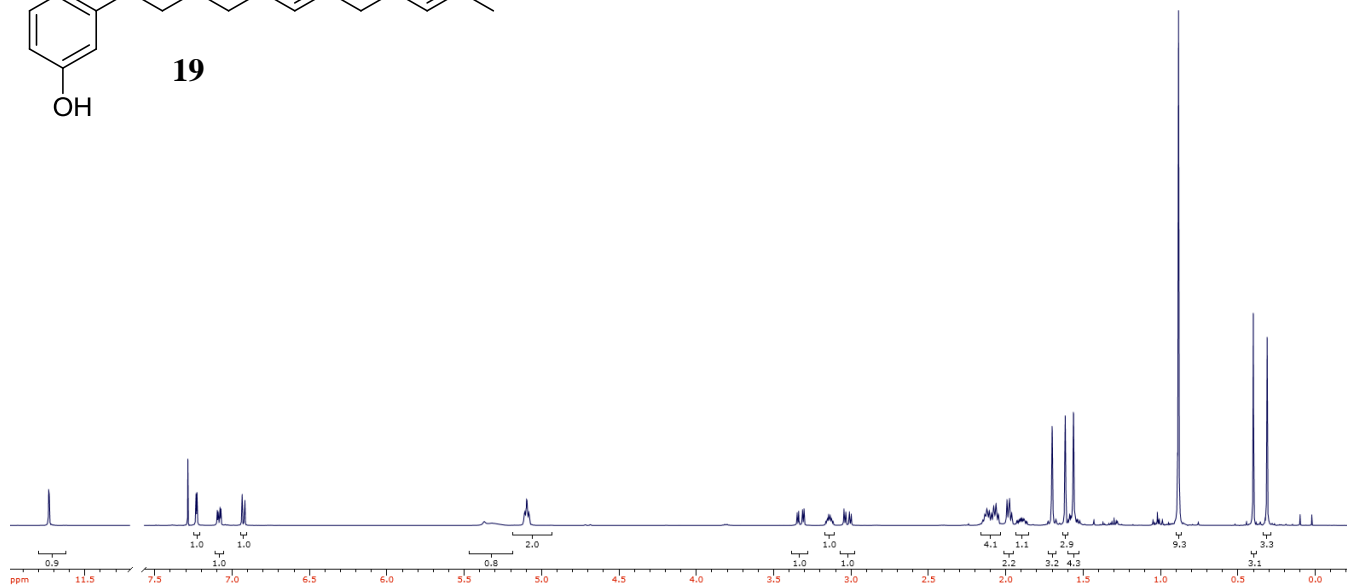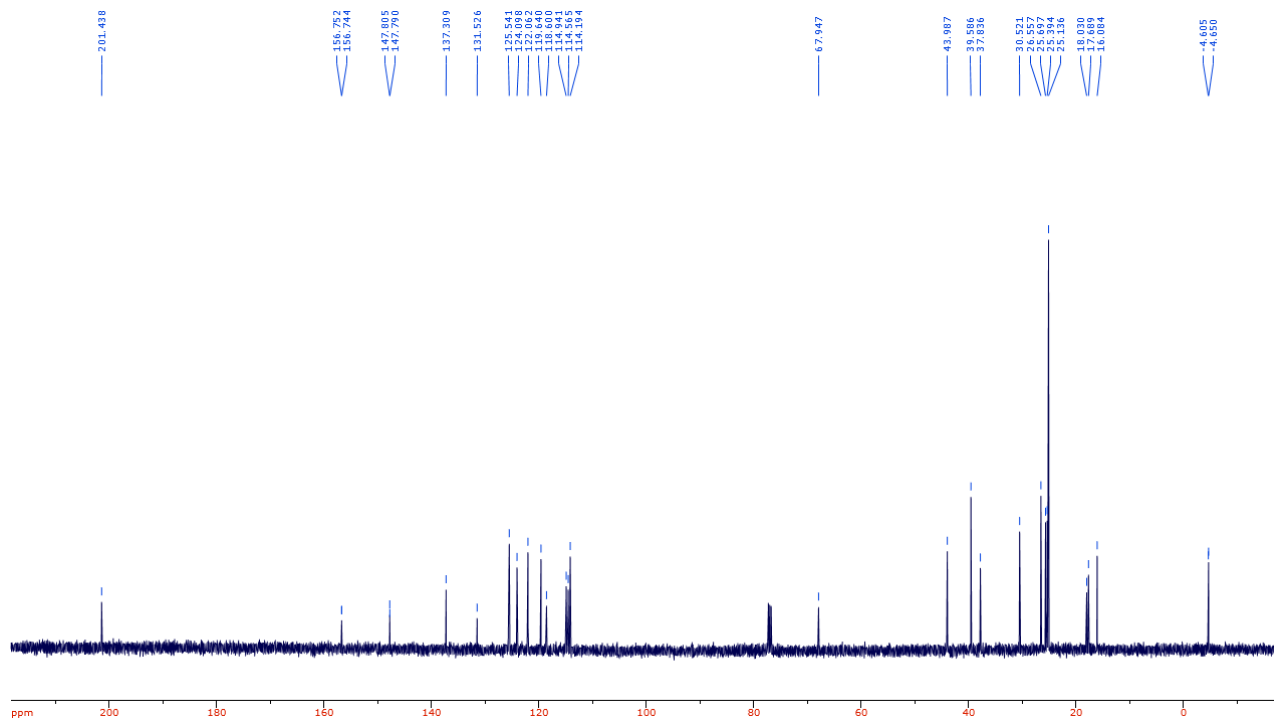



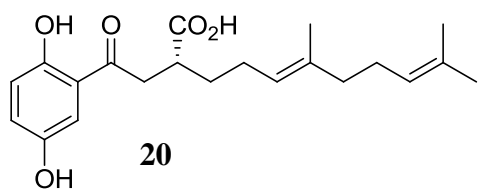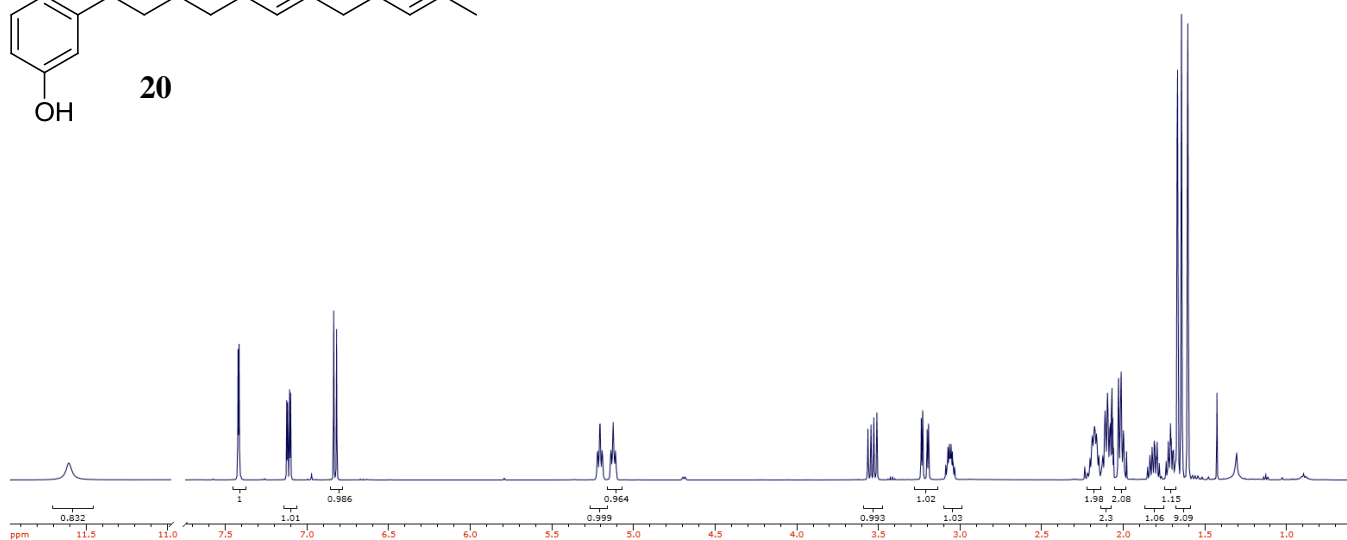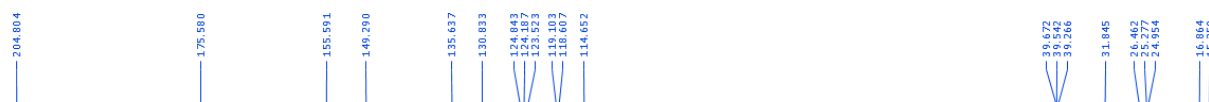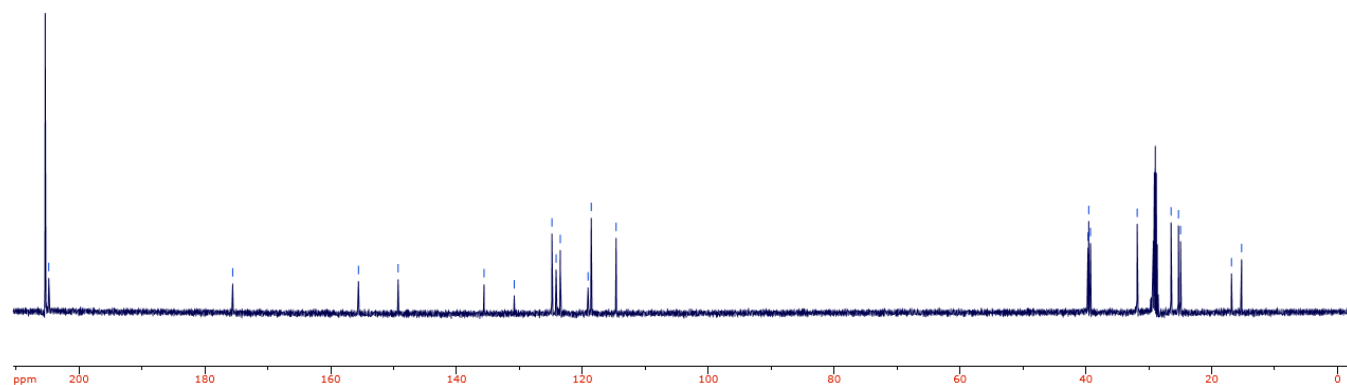

## HPLC Traces for Michael Addition Adducts

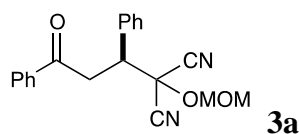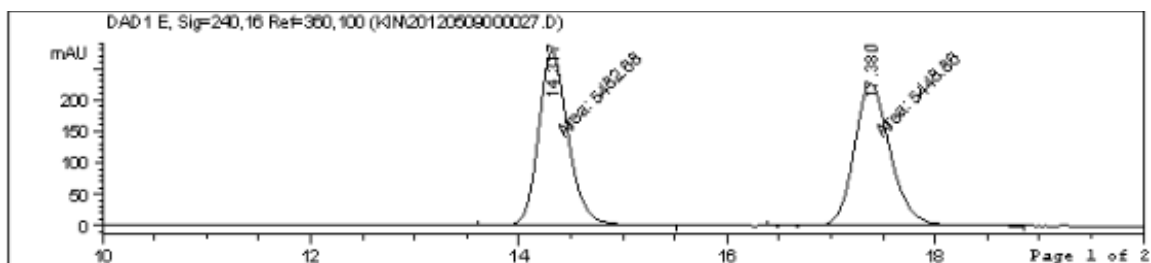

| Peak # | RetTime [min] | Type | Width [min] | Area [mAU*s] | Height [mAU] | Area %  |
|--------|---------------|------|-------------|--------------|--------------|---------|
| 1      | 14.317        | MM   | 0.3281      | 5482.67822   | 278.51114    | 50.1547 |
| 2      | 17.380        | MM   | 0.4023      | 5448.85645   | 225.74504    | 49.8453 |

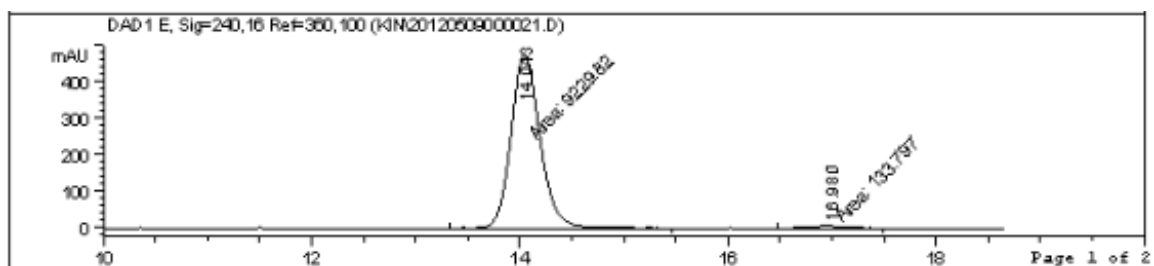

| Peak # | RetTime [min] | Type | Width [min] | Area [mAU*s] | Height [mAU] | Area %  |
|--------|---------------|------|-------------|--------------|--------------|---------|
| 1      | 14.043        | MM   | 0.3208      | 9229.82324   | 479.56891    | 98.5711 |
| 2      | 16.980        | MM   | 0.3681      | 133.79689    | 6.05863      | 1.4289  |

Enantiomeric excess (97% ee) was measured by HPLC (Chiralcel IA, 3% IPA/Hexanes, 1 mL/min,  $R_{t1}$  = 14.0,  $R_{t2}$  = 16.98

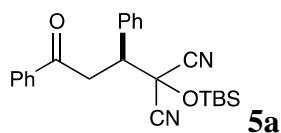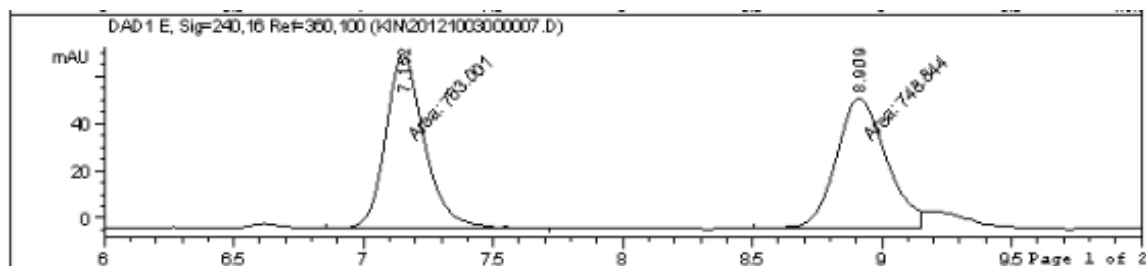

| Peak # | RetTime [min] | Type | Width [min] | Area [mAU*s] | Height [mAU] | Area %  |
|--------|---------------|------|-------------|--------------|--------------|---------|
| 1      | 7.152         | MM   | 0.1726      | 753.00140    | 73.56905     | 50.4682 |
| 2      | 8.909         | MF   | 0.2264      | 748.84395    | 55.12918     | 49.5318 |

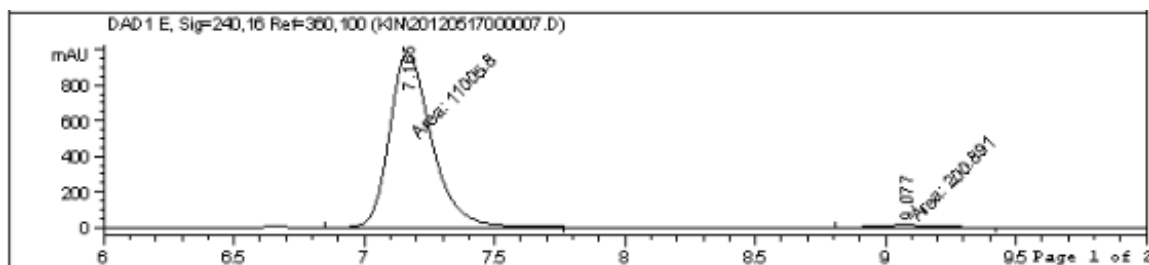

| Peak # | RetTime [min] | Type | Width [min] | Area [mAU*s] | Height [mAU] | Area %  |
|--------|---------------|------|-------------|--------------|--------------|---------|
| 1      | 7.165         | MM   | 0.1864      | 1.10058e4    | 984.06708    | 98.2074 |
| 2      | 9.077         | MM   | 0.2434      | 200.89079    | 13.75446     | 1.7926  |

Enantiomeric excess (96% ee) was measured by HPLC (Chiralcel IA, 2% IPA/Hexanes, 1 mL/min,  $R_{t1}$  = 7.2,  $R_{t2}$  = 9.1

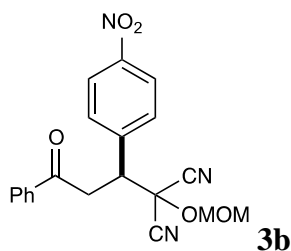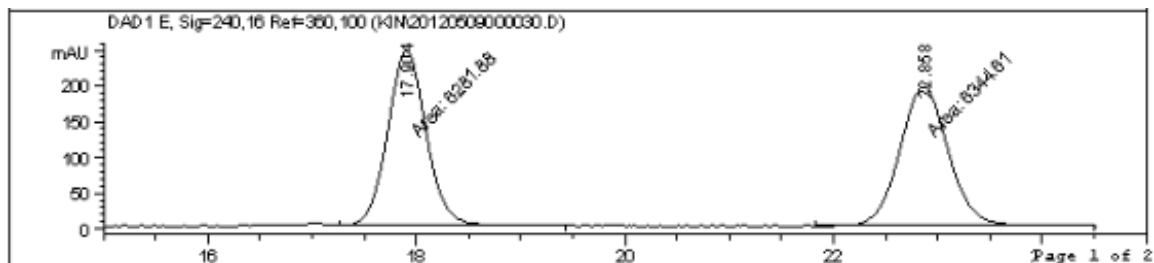

| Peak # | RetTime [min] | Type | Width [min] | Area [mAU*s] | Height [mAU] | Area %  |
|--------|---------------|------|-------------|--------------|--------------|---------|
| 1      | 17.904        | HM   | 0.4286      | 6281.87500   | 244.25079    | 49.7516 |
| 2      | 22.858        | HM   | 0.5447      | 6344.61279   | 194.13542    | 50.2484 |

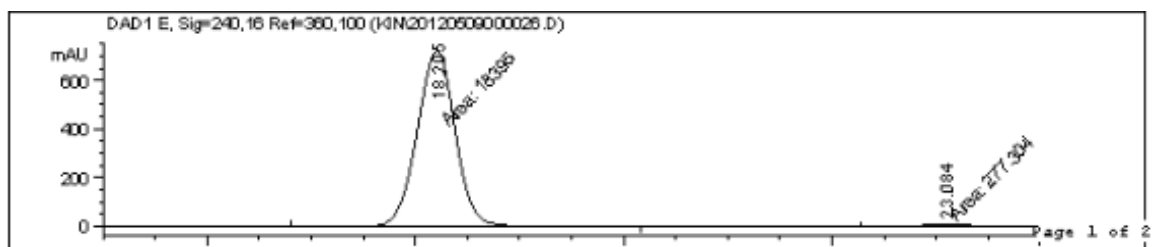

| Peak # | RetTime [min] | Type | Width [min] | Area [mAU*s] | Height [mAU] | Area %  |
|--------|---------------|------|-------------|--------------|--------------|---------|
| 1      | 18.205        | HM   | 0.4251      | 1.83950e4    | 721.26532    | 98.5149 |
| 2      | 23.084        | HM   | 0.5141      | 277.30447    | 8.98993      | 1.4851  |

Enantiomeric excess (97% ee) was measured by HPLC (Chiralcel IA, 15% EtOH/Hexanes, 1 mL/min,  $R_{t1} = 18.2$ ,  $R_{t2} = 23.1$ )

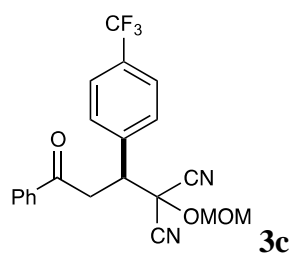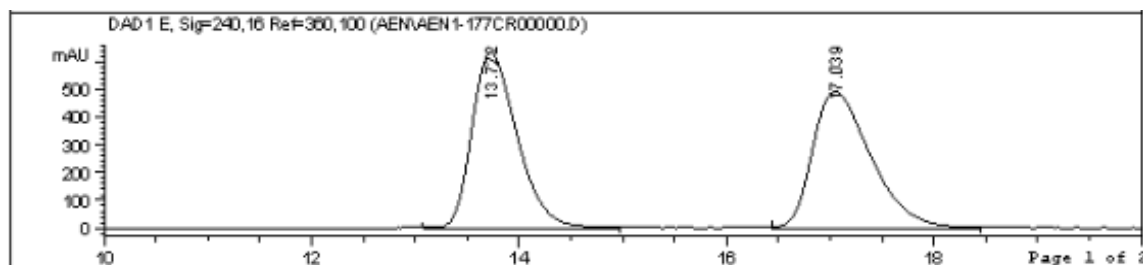

| Peak # | RetTime [min] | Type | Width [min] | Area [mAU*s] | Height [mAU] | Area %  |
|--------|---------------|------|-------------|--------------|--------------|---------|
| 1      | 13.722        | VB   | 0.4441      | 1.92072e4    | 632.74469    | 49.9400 |
| 2      | 17.039        | VB   | 0.5617      | 1.92534e4    | 492.89282    | 50.0600 |

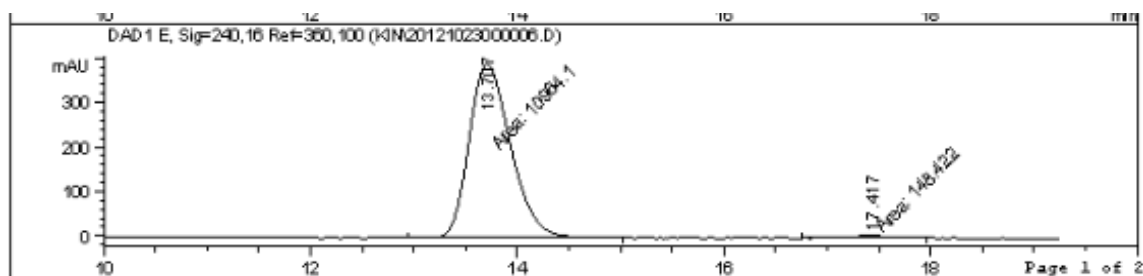

| Peak # | RetTime [min] | Type | Width [min] | Area [mAU*s] | Height [mAU] | Area %  |
|--------|---------------|------|-------------|--------------|--------------|---------|
| 1      | 13.707        | MM   | 0.4669      | 1.09641e4    | 391.36951    | 98.6644 |
| 2      | 17.417        | MM   | 0.5142      | 148.42195    | 4.81089      | 1.3356  |

Enantiomeric excess (97% ee) was measured by HPLC (Chiralcel OD-H, 4% IPA/Hexanes, 1 mL/min,  $R_{t1} = 13.7$ ,  $R_{t2} = 17.4$ )

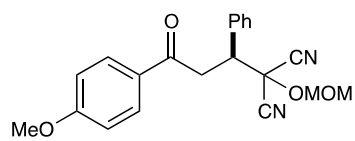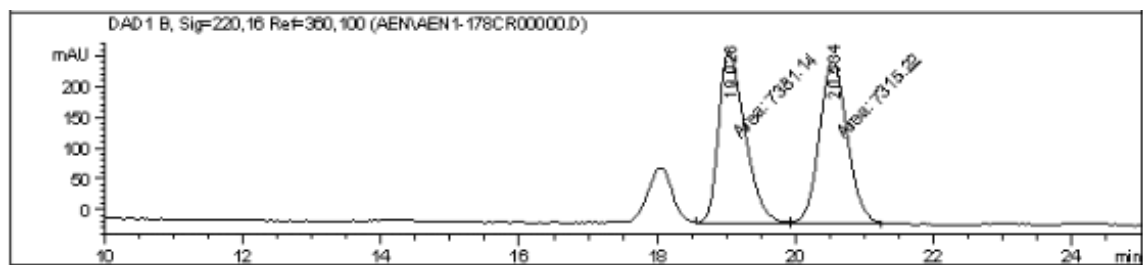

| Peak # | RetTime [min] | Type | Width [min] | Area [mAU*s] | Height [mAU] | Area %  |
|--------|---------------|------|-------------|--------------|--------------|---------|
| 1      | 19.026        | MM   | 0.4426      | 7381.13672   | 277.95538    | 50.2242 |
| 2      | 20.534        | MM   | 0.4637      | 7315.22363   | 262.95016    | 49.7758 |

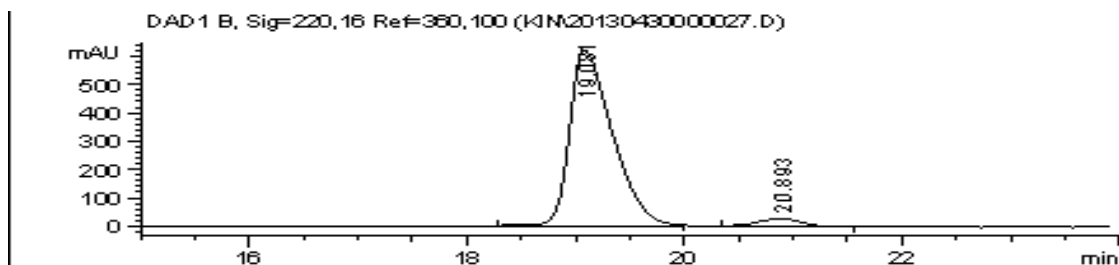

| Peak # | RetTime [min] | Type | Width [min] | Area [mAU*s] | Height [mAU] | Area %  |
|--------|---------------|------|-------------|--------------|--------------|---------|
| 1      | 19.081        | BB   | 0.4006      | 1.71669e4    | 620.92609    | 95.6594 |
| 2      | 20.893        | BB   | 0.3456      | 778.95526    | 27.74458     | 4.3406  |

Enantiomeric excess (92% ee) was measured by HPLC (Chiralcel IA, 10% EtOH/Hexanes, 1 mL/min,  $R_{t1} = 14.98$ ,  $R_{t2} = 16.8$ )

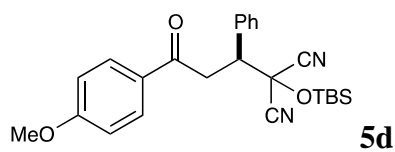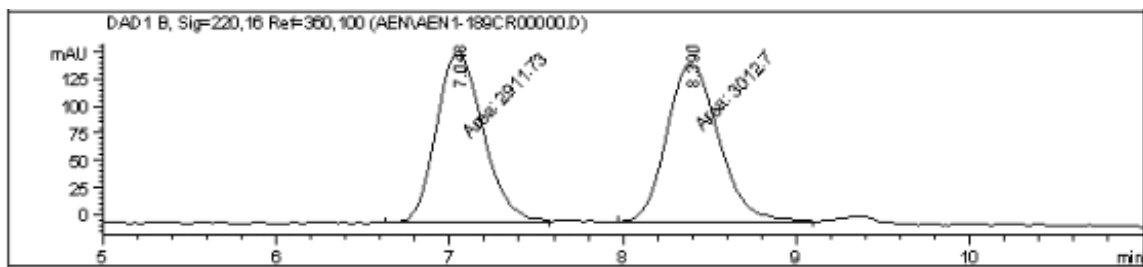

| Peak # | RetTime [min] | Type | Width [min] | Area [mAU*s] | Height [mAU] | Area %  |
|--------|---------------|------|-------------|--------------|--------------|---------|
| 1      | 7.048         | MM   | 0.3094      | 2911.72607   | 156.85152    | 49.1478 |
| 2      | 8.390         | MM   | 0.3465      | 3012.70361   | 144.89948    | 50.8522 |

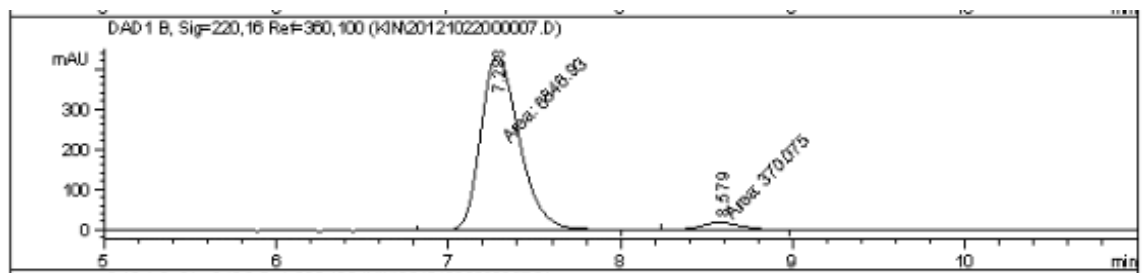

| Peak # | RetTime [min] | Type | Width [min] | Area [mAU*s] | Height [mAU] | Area %  |
|--------|---------------|------|-------------|--------------|--------------|---------|
| 1      | 7.283         | MM   | 0.2623      | 6846.92969   | 435.01834    | 94.8722 |
| 2      | 8.579         | MM   | 0.3039      | 370.07526    | 20.29711     | 5.1278  |

Enantiomeric excess (90% ee) was measured by HPLC (Chiralcel OD-H, 4% IPA/Hexanes, 1 mL/min,  $R_{t1} = 7.3$ ,  $R_{t2} = 8.6$ )

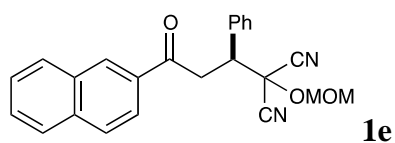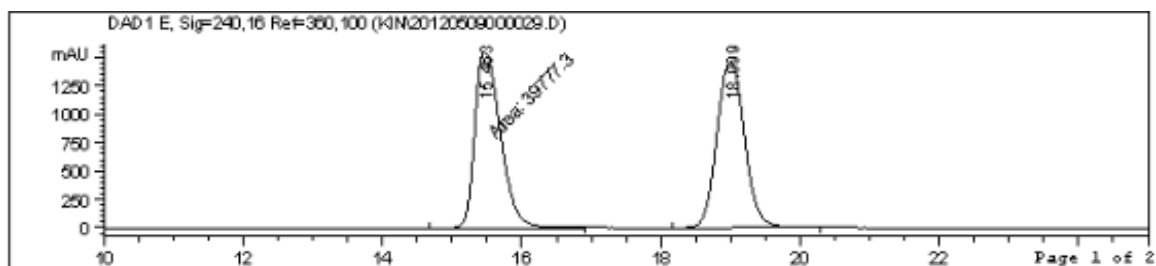

| Peak # | RetTime [min] | Type | Width [min] | Area [mAU*s] | Height [mAU] | Area %  |
|--------|---------------|------|-------------|--------------|--------------|---------|
| 1      | 15.463        | NM   | 0.4271      | 3.97773e4    | 1552.37195   | 49.5619 |
| 2      | 18.999        | BB   | 0.3591      | 4.04805e4    | 1470.85608   | 50.4381 |

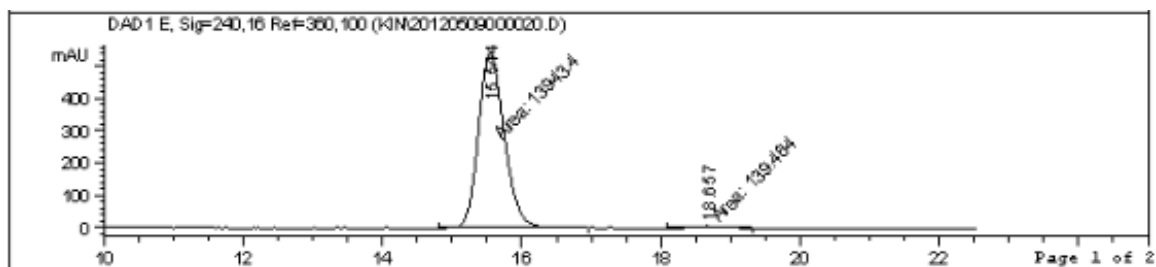

| Peak # | RetTime [min] | Type | Width [min] | Area [mAU*s] | Height [mAU] | Area %  |
|--------|---------------|------|-------------|--------------|--------------|---------|
| 1      | 15.544        | NM   | 0.4285      | 1.39434e4    | 542.32574    | 99.0097 |
| 2      | 18.657        | NM   | 0.3911      | 139.46436    | 5.94375      | 0.9903  |

Enantiomeric excess (98% ee) was measured by HPLC (Chiralcel IA, 7% EtOH/Hexanes, 1 mL/min,  $R_{t1} = 15.5$ ,  $R_{t2} = 18.7$ )



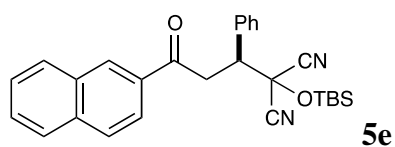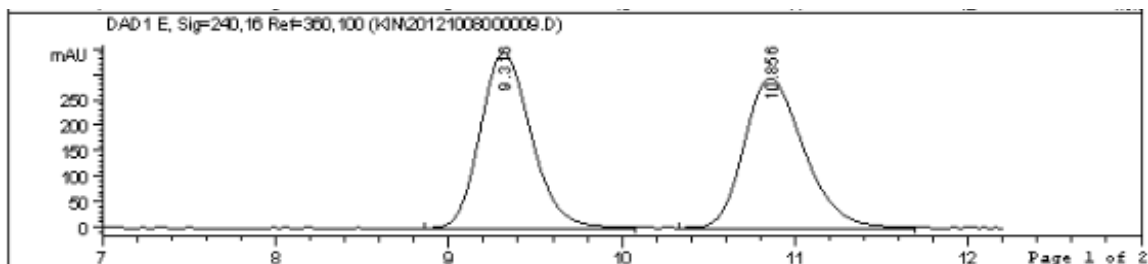

| Peak # | RetTime [min] | Type | Width [min] | Area [mAU*s] | Height [mAU] | Area %  |
|--------|---------------|------|-------------|--------------|--------------|---------|
| 1      | 9.316         | VB   | 0.3152      | 7054.97998   | 344.11081    | 50.0210 |
| 2      | 10.856        | VB   | 0.3692      | 7049.06543   | 294.57782    | 49.9790 |

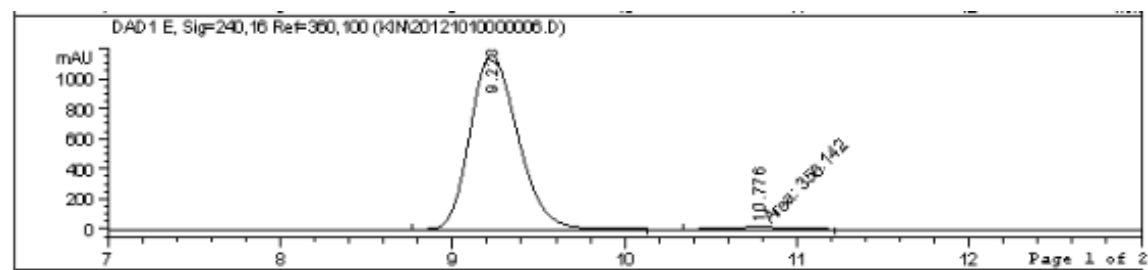

| Peak # | RetTime [min] | Type | Width [min] | Area [mAU*s] | Height [mAU] | Area %  |
|--------|---------------|------|-------------|--------------|--------------|---------|
| 1      | 9.223         | VB   | 0.3041      | 2.23920e4    | 1155.47144   | 98.4344 |
| 2      | 10.776        | HM   | 0.3970      | 356.14169    | 14.95208     | 1.5656  |

Enantiomeric excess (97% ee) was measured by HPLC (Chiralcel OD-H, 2% IPA/Hexanes, 1 mL/min,  $R_{t1} = 9.2$ ,  $R_{t2} = 10.8$ )

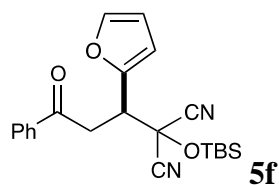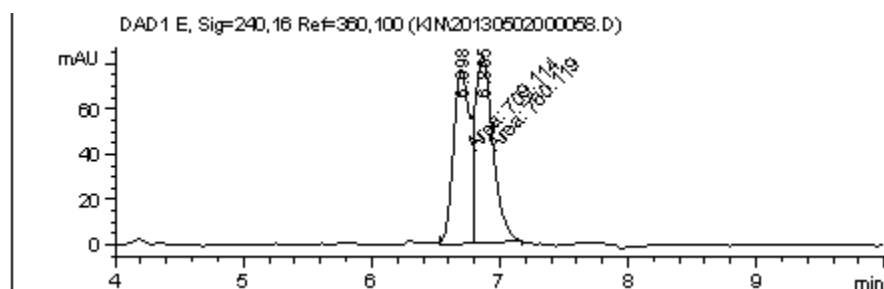

Signal 5: DAD1 E, Sig=240,16 Ref=360,100

| Peak # | RetTime [min] | Type | Width [min] | Area [mAU*s] | Height [mAU] | Area %  |
|--------|---------------|------|-------------|--------------|--------------|---------|
| 1      | 6.698         | MM   | 0.1537      | 709.11414    | 76.91112     | 48.2642 |
| 2      | 6.865         | MM   | 0.1532      | 760.11920    | 82.68867     | 51.7358 |

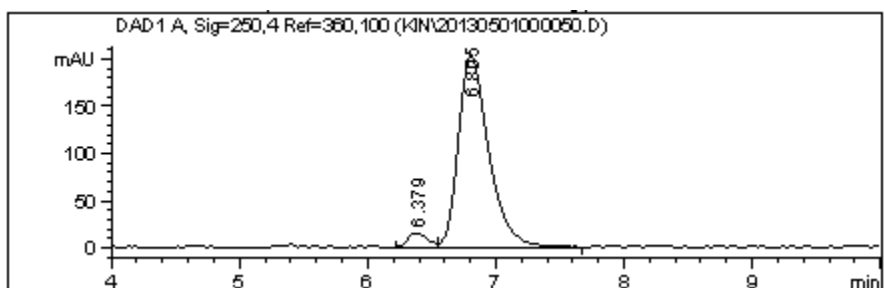

Signal 1: DAD1 A, Sig=250,4 Ref=360,100

| Peak # | RetTime [min] | Type | Width [min] | Area [mAU*s] | Height [mAU] | Area %  |
|--------|---------------|------|-------------|--------------|--------------|---------|
| 1      | 6.379         | BV   | 0.1665      | 181.03435    | 16.18402     | 5.0361  |
| 2      | 6.805         | VB   | 0.2518      | 3413.67529   | 203.35841    | 94.9639 |

Enantiomeric excess (90% ee) was measured by HPLC (Chiralcel AD-H, 2% IPA/Hexanes, 1 mL/min,  $R_{t1} = 6.3$ ,  $R_{t2} = 6.8$ )

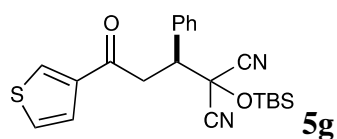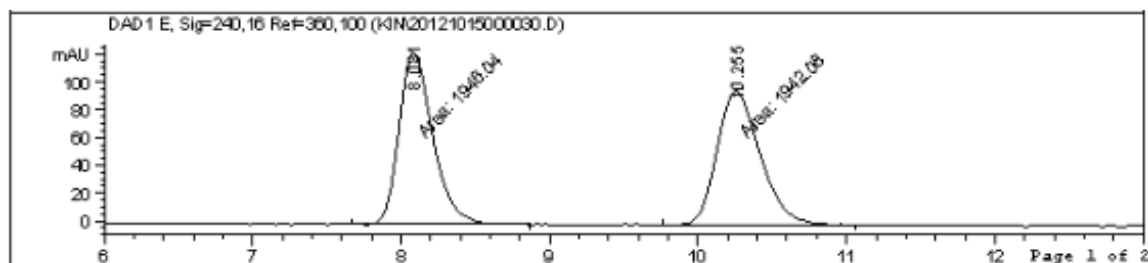

| Peak # | RetTime [min] | Type | Width [min] | Area [mAU*s] | Height [mAU] | Area %  |
|--------|---------------|------|-------------|--------------|--------------|---------|
| 1      | 8.081         | MM   | 0.2625      | 1946.03650   | 123.53961    | 50.0508 |
| 2      | 10.255        | MM   | 0.3366      | 1942.08252   | 96.14926     | 49.9492 |

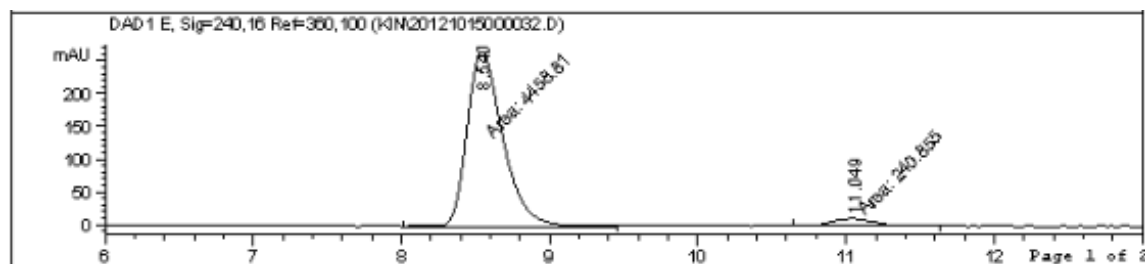

| Peak # | RetTime [min] | Type | Width [min] | Area [mAU*s] | Height [mAU] | Area %  |
|--------|---------------|------|-------------|--------------|--------------|---------|
| 1      | 8.540         | MM   | 0.2807      | 4458.81201   | 264.72549    | 94.8751 |
| 2      | 11.049        | MM   | 0.3544      | 240.85480    | 11.32610     | 5.1249  |

Enantiomeric excess (90% ee) was measured by HPLC (Chiralcel OD-H, 2% IPA/Hexanes, 1 mL/min,  $R_{t1} = 8.5$ ,  $R_{t2} = 11.0$ )

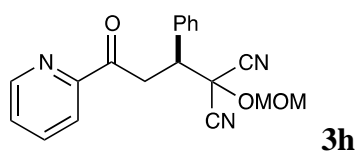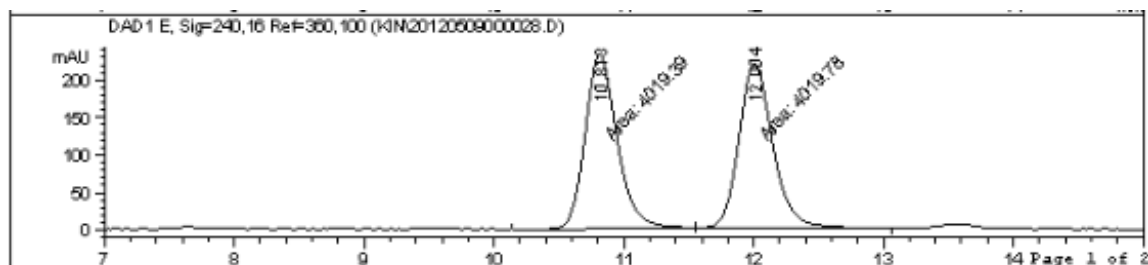

| Peak # | RetTime [min] | Type | Width [min] | Area [mAU*s] | Height [mAU] | Area %  |
|--------|---------------|------|-------------|--------------|--------------|---------|
| 1      | 10.813        | MF   | 0.2882      | 4019.38867   | 232.45528    | 49.9975 |
| 2      | 12.004        | FM   | 0.3054      | 4019.78345   | 219.36412    | 50.0025 |

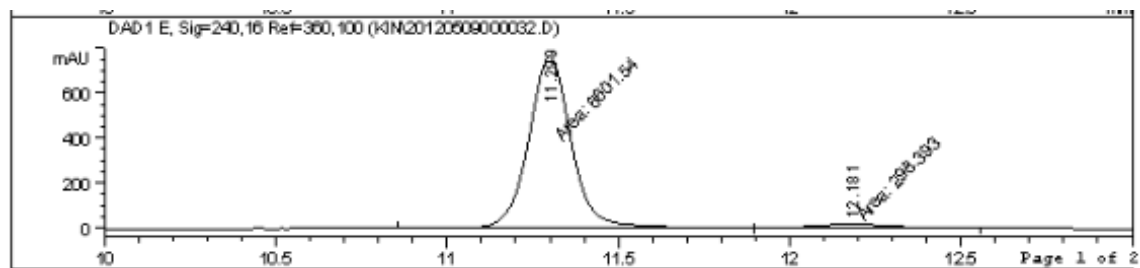

| Peak # | RetTime [min] | Type | Width [min] | Area [mAU*s] | Height [mAU] | Area %  |
|--------|---------------|------|-------------|--------------|--------------|---------|
| 1      | 11.299        | MM   | 0.1440      | 6601.53662   | 764.20398    | 95.6754 |
| 2      | 12.181        | MM   | 0.2684      | 298.39310    | 18.53077     | 4.3246  |

Enantiomeric excess (91% ee) was measured by HPLC (Chiralcel IA, 7% IPA/Hexanes, 1 mL/min,  $R_{t1}$  = 11.3,  $R_{t2}$  = 12.2

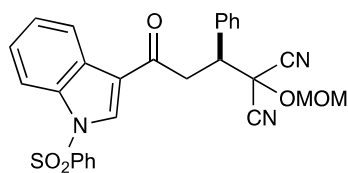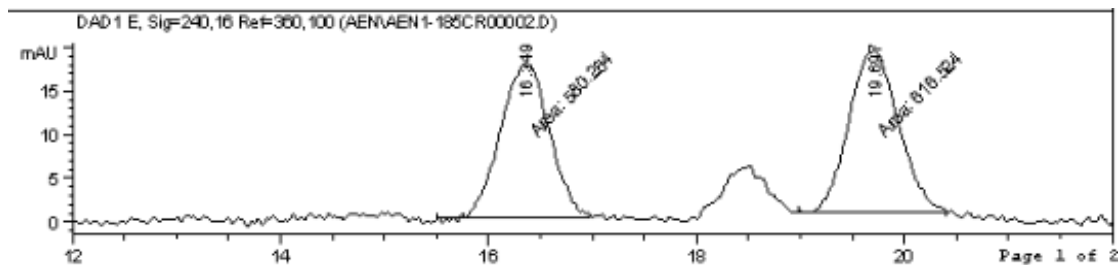

| Peak # | RetTime [min] | Type | Width [min] | Area [mAU*s] | Height [mAU] | Area %  |
|--------|---------------|------|-------------|--------------|--------------|---------|
| 1      | 16.349        | MM   | 0.5485      | 580.26434    | 17.63239     | 48.4851 |
| 2      | 19.697        | MM   | 0.5551      | 616.52435    | 18.51226     | 51.5149 |

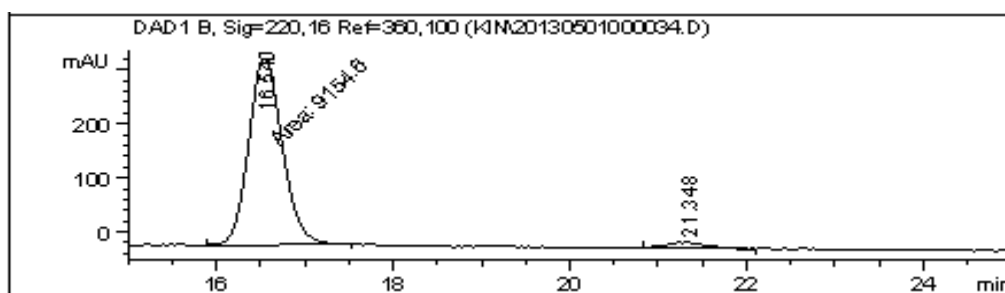

Signal 2: DAD1 B, Sig=220,16 Ref=360,100

| Peak # | RetTime [min] | Type | Width [min] | Area [mAU*s] | Height [mAU] | Area %  |
|--------|---------------|------|-------------|--------------|--------------|---------|
| 1      | 16.540        | MM   | 0.4421      | 9154.60254   | 345.11322    | 96.0906 |
| 2      | 21.348        | BV   | 0.4030      | 372.44806    | 11.17029     | 3.9094  |

Totals :                                      9527.05060    356.28351

Enantiomeric excess (92% ee) was measured by HPLC (Chiralcel IA, 10% EtOH/Hexanes, 1.1 mL/min,  $R_{t1} = 14.3$ ,  $R_{t2} = 16.9$ )

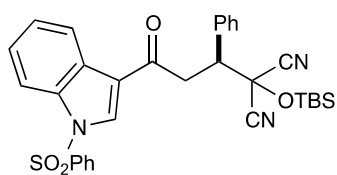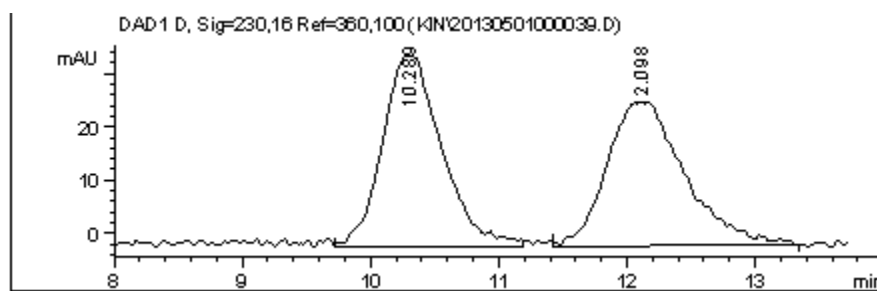

Signal 4: DAD1 D, Sig=230,16 Ref=360,100

| Peak # | RetTime [min] | Type | Width [min] | Area [mAU*s] | Height [mAU] | Area %  |
|--------|---------------|------|-------------|--------------|--------------|---------|
| 1      | 10.289        | VB   | 0.4361      | 1150.34753   | 35.87642     | 50.1939 |
| 2      | 12.098        | BB   | 0.4995      | 1141.46167   | 27.20297     | 49.8061 |

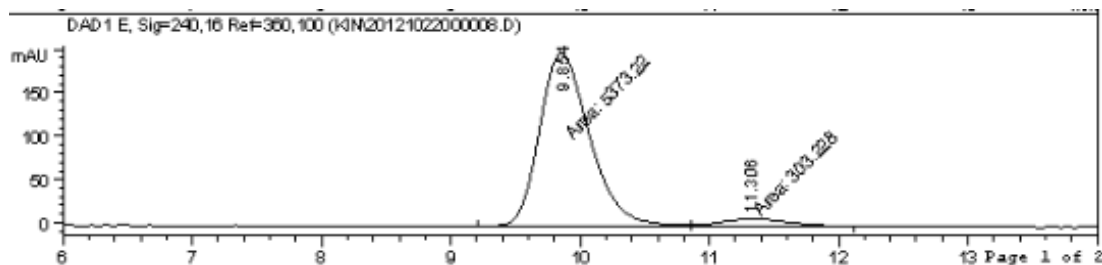

| Peak # | RetTime [min] | Type | Width [min] | Area [mAU*s] | Height [mAU] | Area %  |
|--------|---------------|------|-------------|--------------|--------------|---------|
| 1      | 9.854         | MF   | 0.4498      | 5373.22119   | 199.11612    | 94.6581 |
| 2      | 11.306        | FM   | 0.5831      | 303.22842    | 8.66740      | 5.3419  |

Enantiomeric excess (89% ee) was measured by HPLC (Chiralcel OD-H, 4% IPA/Hexanes, 1 mL/min,  $R_{t1} = 9.9$ ,  $R_{t2} = 11.3$ )

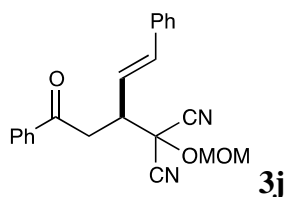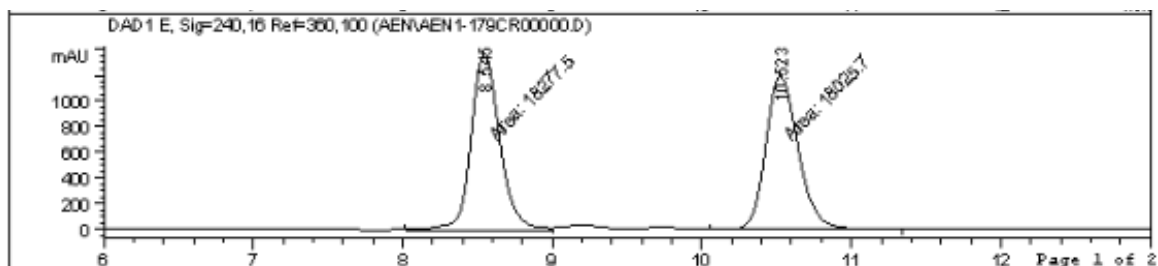

| Peak # | RetTime [min] | Type | Width [min] | Area [mAU*s] | Height [mAU] | Area %  |
|--------|---------------|------|-------------|--------------|--------------|---------|
| 1      | 8.545         | HM   | 0.2223      | 1.82775e4    | 1370.19897   | 50.3468 |
| 2      | 10.523        | HM   | 0.2525      | 1.80257e4    | 1189.94397   | 49.6532 |

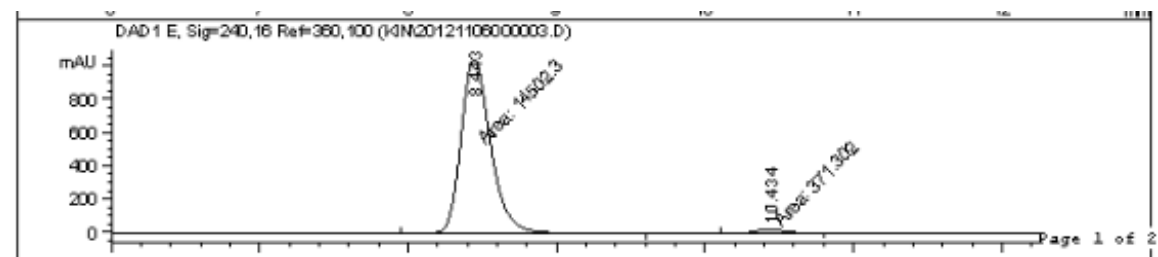

| Peak # | RetTime [min] | Type | Width [min] | Area [mAU*s] | Height [mAU] | Area %  |
|--------|---------------|------|-------------|--------------|--------------|---------|
| 1      | 8.443         | HM   | 0.2307      | 1.45023e4    | 1047.89502   | 97.5036 |
| 2      | 10.434        | HM   | 0.2429      | 371.30151    | 25.47729     | 2.4964  |

Enantiomeric excess (95% ee) was measured by HPLC (Chiralcel IA, 10% EtOH/Hexanes, 1 mL/min,  $R_{t1} = 8.4$ ,  $R_{t2} = 10.4$ )

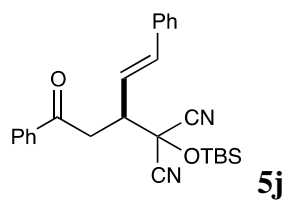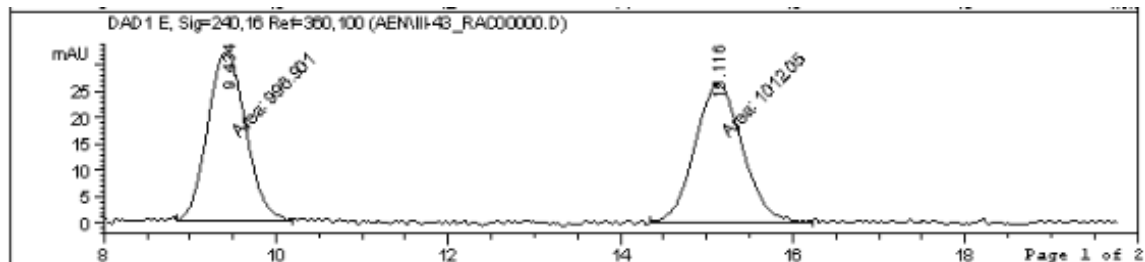

| Peak # | RetTime [min] | Type | Width [min] | Area [mAU*s] | Height [mAU] | Area %  |
|--------|---------------|------|-------------|--------------|--------------|---------|
| 1      | 9.434         | MM   | 0.5150      | 996.90125    | 32.26347     | 49.6229 |
| 2      | 15.116        | MM   | 0.6321      | 1012.05139   | 26.68362     | 50.3771 |

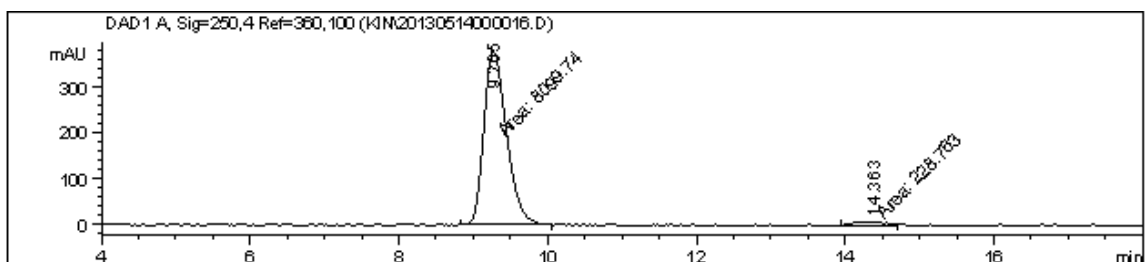

| Peak # | RetTime [min] | Type | Width [min] | Area [mAU*s] | Height [mAU] | Area %  |
|--------|---------------|------|-------------|--------------|--------------|---------|
| 1      | 9.265         | MM   | 0.3552      | 8099.74268   | 380.03586    | 97.2533 |
| 2      | 14.363        | MM   | 0.4513      | 228.76299    | 8.44903      | 2.7467  |

Enantiomeric excess (94% ee) was measured by HPLC (Chiralcel OD-H, 2% IPA/Hexanes, 1 mL/min,  $R_{t1} = 11.3$ ,  $R_{t2} = 17.8$ )



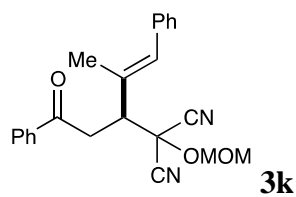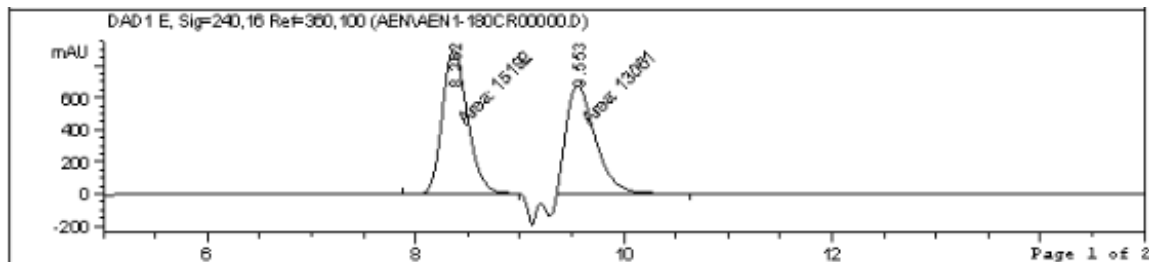

| Peak # | RetTime [min] | Type | Width [min] | Area [mAU*s] | Height [mAU] | Area %  |
|--------|---------------|------|-------------|--------------|--------------|---------|
| 1      | 8.362         | MM   | 0.2813      | 1.51920e4    | 900.14709    | 53.7713 |
| 2      | 9.553         | MM   | 0.3231      | 1.30610e4    | 673.68451    | 46.2287 |

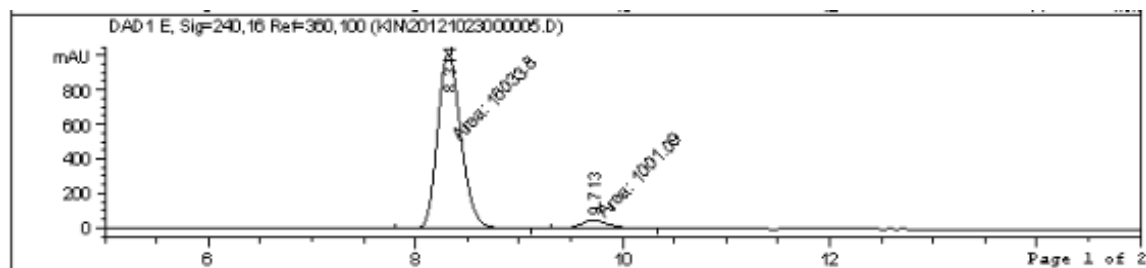

| Peak # | RetTime [min] | Type | Width [min] | Area [mAU*s] | Height [mAU] | Area %  |
|--------|---------------|------|-------------|--------------|--------------|---------|
| 1      | 8.314         | MM   | 0.2645      | 1.60338e4    | 1010.21722   | 94.1233 |
| 2      | 9.713         | MM   | 0.3571      | 1001.08557   | 46.72836     | 5.8767  |

Enantiomeric excess (88% ee) was measured by HPLC (Chiralcel OD-H, 7% IPA/Hexanes, 1 mL/min,  $R_{t1} = 8.3$ ,  $R_{t2} = 9.7$ )

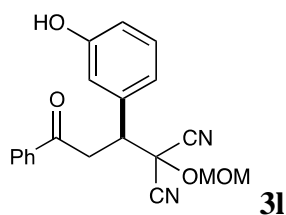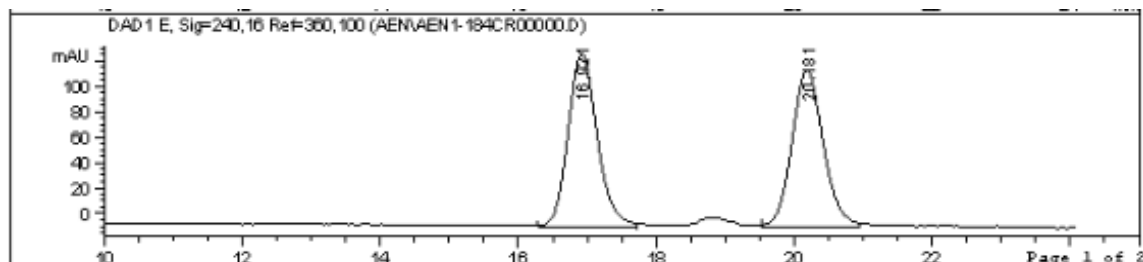

| Peak # | RetTime [min] | Type | Width [min] | Area [mAU*s] | Height [mAU] | Area %  |
|--------|---------------|------|-------------|--------------|--------------|---------|
| 1      | 16.921        | VV   | 0.4337      | 3978.15308   | 135.84450    | 50.2720 |
| 2      | 20.181        | VV   | 0.4770      | 3935.11255   | 123.09692    | 49.7280 |

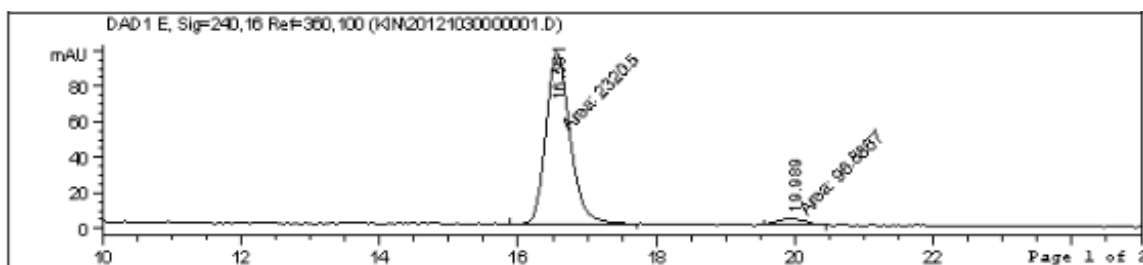

| Peak # | RetTime [min] | Type | Width [min] | Area [mAU*s] | Height [mAU] | Area %  |
|--------|---------------|------|-------------|--------------|--------------|---------|
| 1      | 16.561        | NM   | 0.4022      | 2320.50342   | 96.15486     | 95.9921 |
| 2      | 19.989        | NM   | 0.4486      | 96.88666     | 3.59979      | 4.0079  |

Enantiomeric excess (92% ee) was measured by HPLC (Chiralcel IA, 10% EtOH/Hexanes, 1 mL/min,  $R_{t1} = 16.6$ ,  $R_{t2} = 19.99$ )

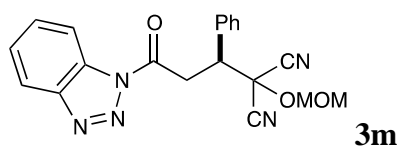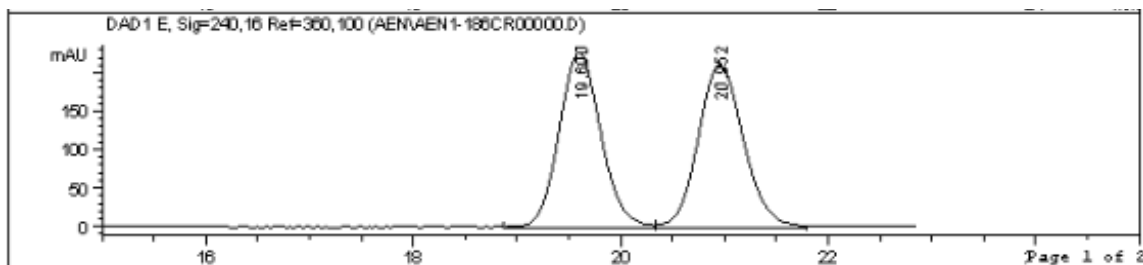

| Peak # | RetTime [min] | Type | Width [min] | Area [mAU*s] | Height [mAU] | Area %  |
|--------|---------------|------|-------------|--------------|--------------|---------|
| 1      | 19.600        | VV   | 0.4301      | 6359.70557   | 227.51653    | 49.7847 |
| 2      | 20.952        | VB   | 0.4577      | 6414.71094   | 211.61069    | 50.2153 |

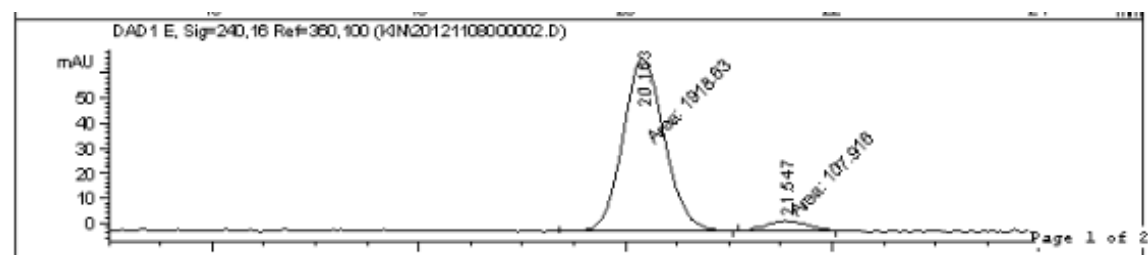

| Peak # | RetTime [min] | Type | Width [min] | Area [mAU*s] | Height [mAU] | Area %  |
|--------|---------------|------|-------------|--------------|--------------|---------|
| 1      | 20.163        | MM   | 0.4628      | 1918.63464   | 69.09690     | 94.6749 |
| 2      | 21.547        | MM   | 0.4468      | 107.91570    | 4.02525      | 5.3251  |

Enantiomeric excess (89% ee) was measured by HPLC (Chiralcel AD-H, 6% IPA/Hexanes, 1 mL/min,  $R_{t1} = 20.2$ ,  $R_{t2} = 21.5$ )

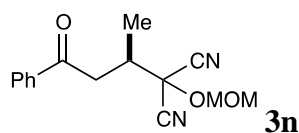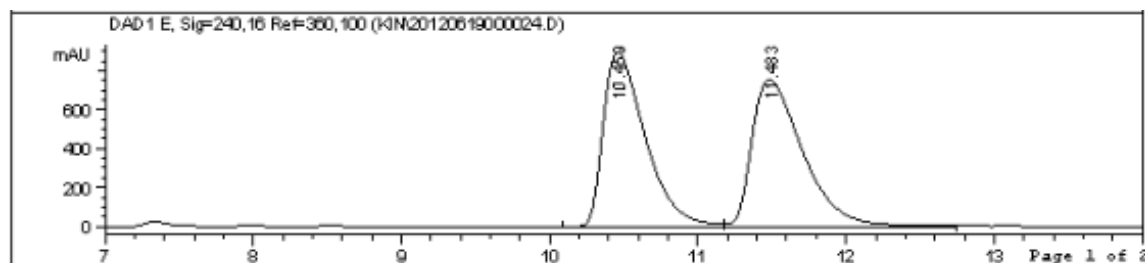

| Peak # | RetTime [min] | Type | Width [min] | Area [mAU*s] | Height [mAU] | Area %  |
|--------|---------------|------|-------------|--------------|--------------|---------|
| 1      | 10.459        | VV   | 0.2961      | 1.76878e4    | 896.71484    | 49.3896 |
| 2      | 11.483        | VB   | 0.3544      | 1.81250e4    | 759.56500    | 50.6104 |

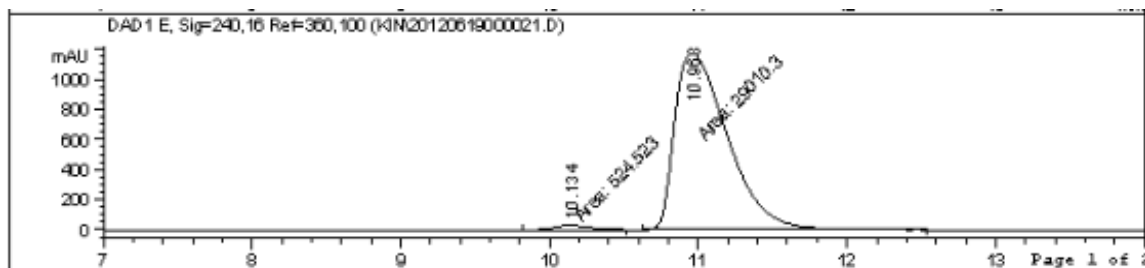

| Peak # | RetTime [min] | Type | Width [min] | Area [mAU*s] | Height [mAU] | Area %  |
|--------|---------------|------|-------------|--------------|--------------|---------|
| 1      | 10.134        | NH   | 0.2839      | 524.52325    | 30.79716     | 1.7759  |
| 2      | 10.963        | NH   | 0.4137      | 2.90103e4    | 1168.82202   | 98.2241 |

Enantiomeric excess (96% ee) was measured by HPLC (Chiralcel AS-H, 2% IPA/Hexanes, 1 mL/min,  $R_{t1} = 10.1$ ,  $R_{t2} = 10.96$ )

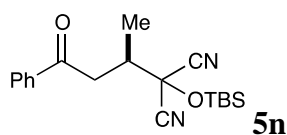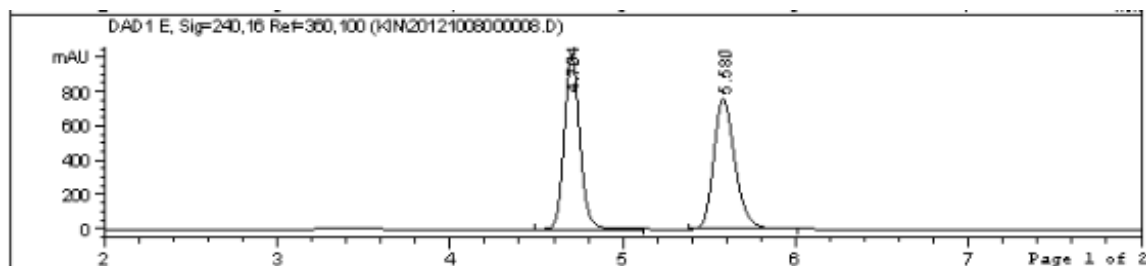

| Peak # | RetTime [min] | Type | Width [min] | Area [mAU*s] | Height [mAU] | Area %  |
|--------|---------------|------|-------------|--------------|--------------|---------|
| 1      | 4.704         | VB   | 0.0974      | 6422.09961   | 1021.12805   | 49.5889 |
| 2      | 5.580         | VB   | 0.1322      | 6528.58447   | 760.42505    | 50.4111 |

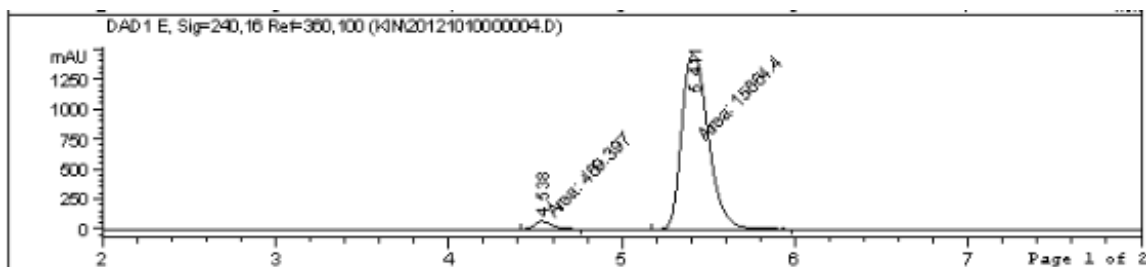

| Peak # | RetTime [min] | Type | Width [min] | Area [mAU*s] | Height [mAU] | Area %  |
|--------|---------------|------|-------------|--------------|--------------|---------|
| 1      | 4.538         | MM   | 0.1201      | 469.39716    | 65.11942     | 2.9094  |
| 2      | 5.411         | MM   | 0.1792      | 1.56644e4    | 1456.79980   | 97.0906 |

Enantiomeric excess (94% ee) was measured by HPLC (Chiralcel OD-H, 2% IPA/Hexanes, 1 mL/min,  $R_{t1} = 4.5$ ,  $R_{t2} = 5.4$ )

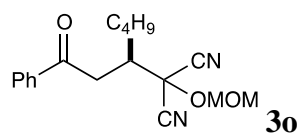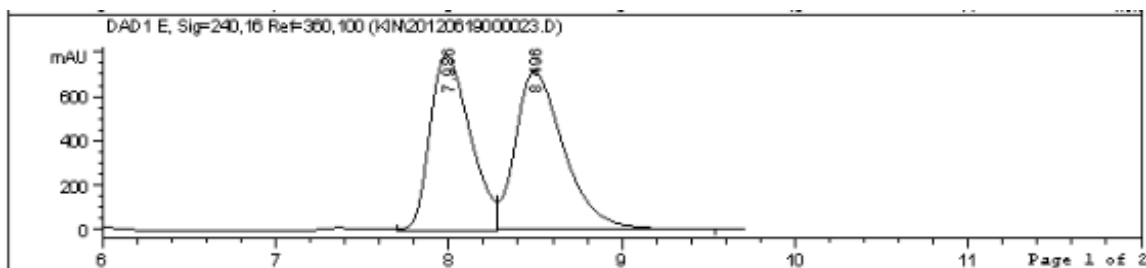

| Peak # | RetTime [min] | Type | Width [min] | Area [mAU*s] | Height [mAU] | Area %  |
|--------|---------------|------|-------------|--------------|--------------|---------|
| 1      | 7.986         | VV   | 0.2478      | 1.26928e4    | 788.70563    | 47.5205 |
| 2      | 8.496         | VB   | 0.2991      | 1.40173e4    | 713.87817    | 52.4795 |

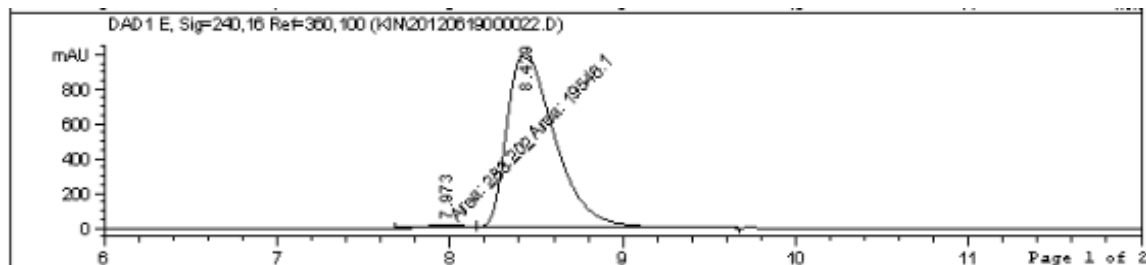

| Peak # | RetTime [min] | Type | Width [min] | Area [mAU*s] | Height [mAU] | Area %  |
|--------|---------------|------|-------------|--------------|--------------|---------|
| 1      | 7.973         | MF   | 0.2269      | 283.20175    | 20.80401     | 1.4282  |
| 2      | 8.429         | FM   | 0.3227      | 1.95461e4    | 1009.36932   | 98.5718 |

Enantiomeric excess (97% ee) was measured by HPLC (Chiralcel AS-H, 2% IPA/Hexanes, 1 mL/min,  $R_{t1} = 7.97$ ,  $R_{t2} = 8.4$ )

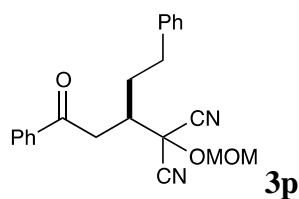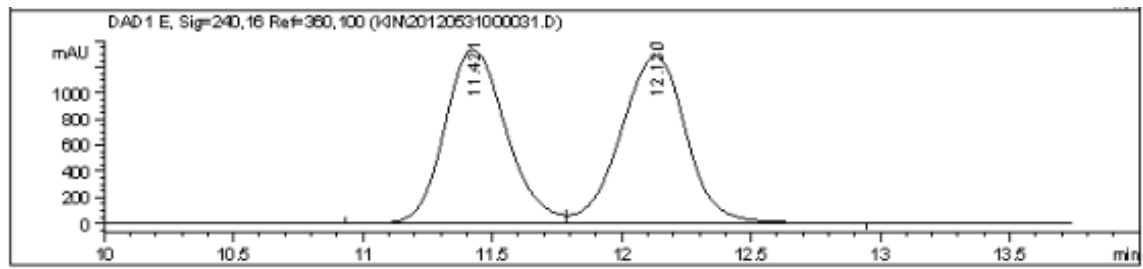

| Peak # | RetTime [min] | Type | Width [min] | Area [mAU*s] | Height [mAU] | Area %  |
|--------|---------------|------|-------------|--------------|--------------|---------|
| 1      | 11.421        | BV   | 0.2567      | 2.20497e4    | 1334.65540   | 49.3850 |
| 2      | 12.130        | VB   | 0.2759      | 2.25989e4    | 1280.59119   | 50.6150 |

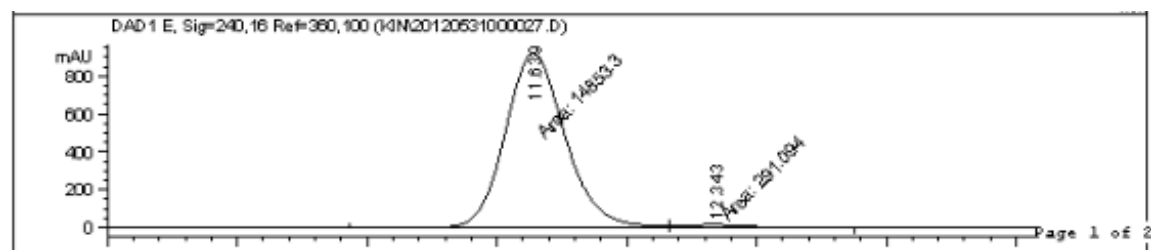

| Peak # | RetTime [min] | Type | Width [min] | Area [mAU*s] | Height [mAU] | Area %  |
|--------|---------------|------|-------------|--------------|--------------|---------|
| 1      | 11.639        | MF   | 0.2681      | 1.48533e4    | 923.33643    | 98.0779 |
| 2      | 12.343        | FM   | 0.2961      | 291.09439    | 16.38369     | 1.9221  |

Enantiomeric excess (96% ee) was measured by HPLC (Chiralcel IA, 3% IPA/Hexanes, 1 mL/min,  $R_{t1}$  = 11.6,  $R_{t2}$  = 12.3

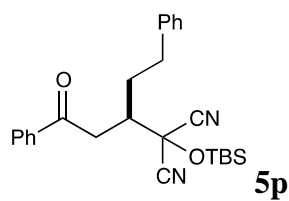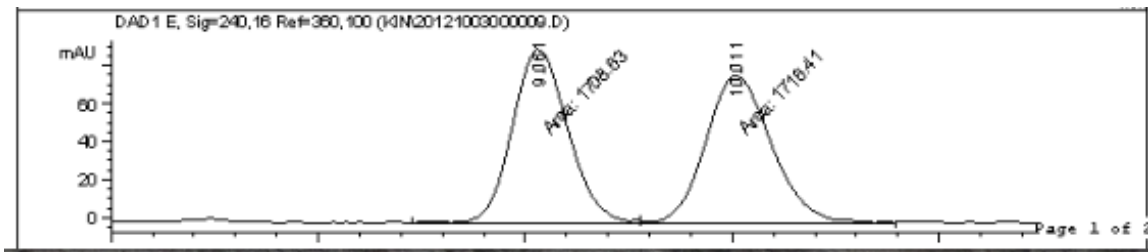

| Peak # | RetTime [min] | Type | Width [min] | Area [mAU*s] | Height [mAU] | Area %  |
|--------|---------------|------|-------------|--------------|--------------|---------|
| 1      | 9.061         | MF   | 0.3117      | 1708.62500   | 91.36168     | 49.8863 |
| 2      | 10.011        | FM   | 0.3698      | 1716.41345   | 77.36601     | 50.1137 |

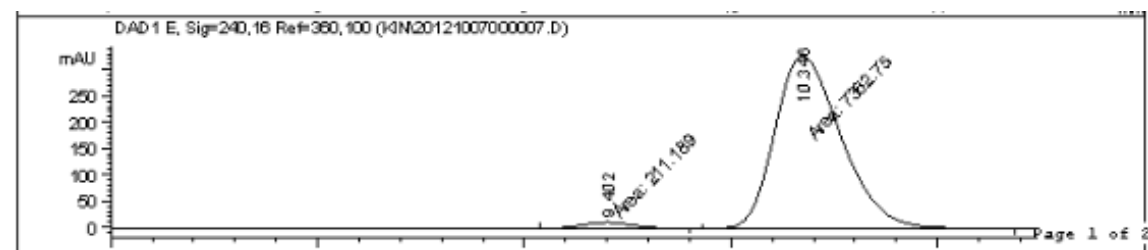

| Peak # | RetTime [min] | Type | Width [min] | Area [mAU*s] | Height [mAU] | Area %  |
|--------|---------------|------|-------------|--------------|--------------|---------|
| 1      | 9.402         | MM   | 0.2901      | 211.18944    | 12.13422     | 2.7884  |
| 2      | 10.346        | MM   | 0.3719      | 7362.75146   | 329.99356    | 97.2116 |

Enantiomeric excess (94% ee) was measured by HPLC (Chiralcel OD-H, 2% IPA/Hexanes, 1 mL/min,  $R_{t1} = 9.4$ ,  $R_{t2} = 10.3$ )



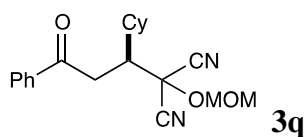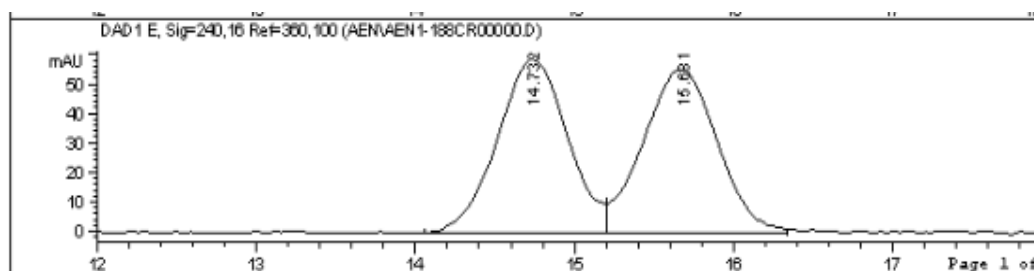

| Peak # | RetTime [min] | Type | Width [min] | Area [mAU*s] | Height [mAU] | Area %  |
|--------|---------------|------|-------------|--------------|--------------|---------|
| 1      | 14.732        | VV   | 0.3809      | 1826.23413   | 59.36001     | 50.0797 |
| 2      | 15.681        | VV   | 0.4029      | 1820.42090   | 55.75108     | 49.9203 |

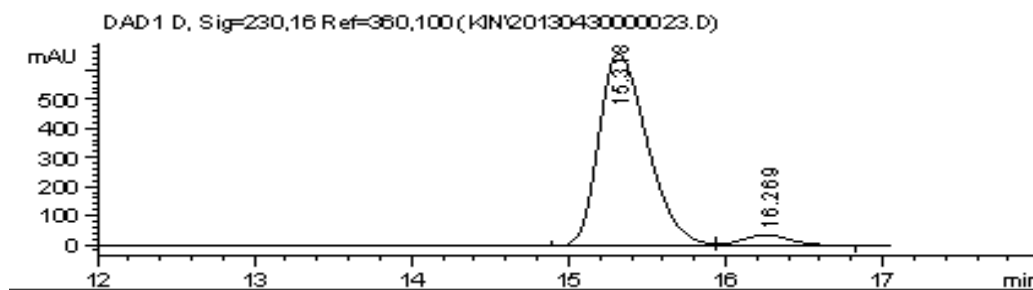

Signal 4: DAD1 D, Sig=230,16 Ref=360,100

| Peak # | RetTime [min] | Type | Width [min] | Area [mAU*s] | Height [mAU] | Area %  |
|--------|---------------|------|-------------|--------------|--------------|---------|
| 1      | 15.318        | BV   | 0.3318      | 1.41904e4    | 662.64569    | 94.4147 |
| 2      | 16.269        | VB   | 0.2929      | 839.45850    | 38.42511     | 5.5853  |

Enantiomeric excess (89% ee) was measured by HPLC (Chiralcel AD-H, 2% IPA/Hexanes, 1 mL/min,  $R_{t1} = 15.3$ ,  $R_{t2} = 16.3$ )

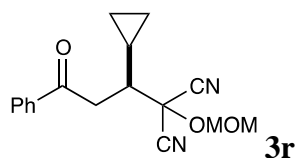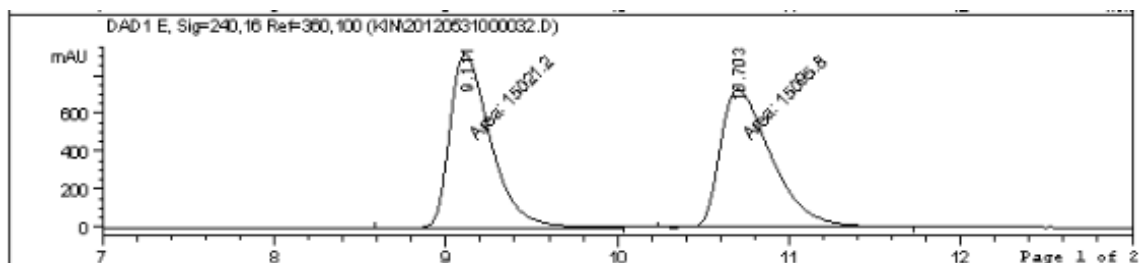

| Peak # | RetTime [min] | Type | Width [min] | Area [mAU*s] | Height [mAU] | Area %  |
|--------|---------------|------|-------------|--------------|--------------|---------|
| 1      | 9.111         | MM   | 0.2739      | 1.50212e4    | 914.01422    | 49.8762 |
| 2      | 10.703        | MM   | 0.3449      | 1.50958e4    | 729.41174    | 50.1238 |

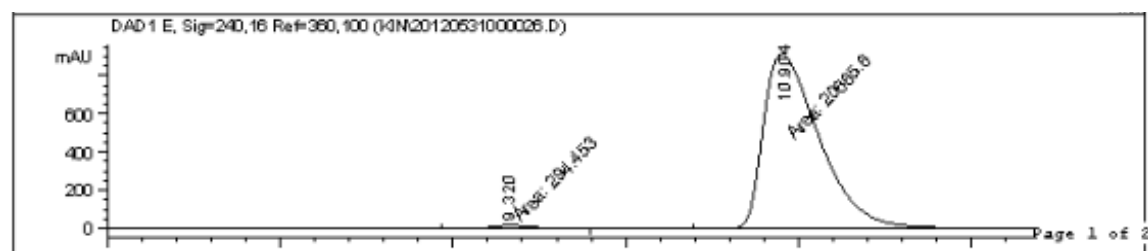

| Peak # | RetTime [min] | Type | Width [min] | Area [mAU*s] | Height [mAU] | Area %  |
|--------|---------------|------|-------------|--------------|--------------|---------|
| 1      | 9.320         | MM   | 0.2701      | 294.45319    | 18.16604     | 1.4048  |
| 2      | 10.904        | MM   | 0.3764      | 2.06656e4    | 914.96112    | 98.5952 |

Enantiomeric excess (97% ee) was measured by HPLC (Chiralcel AS-H, 3% IPA/Hexanes, 1 mL/min,  $R_{t1} = 9.3$ ,  $R_{t2} = 10.9$ )

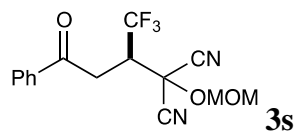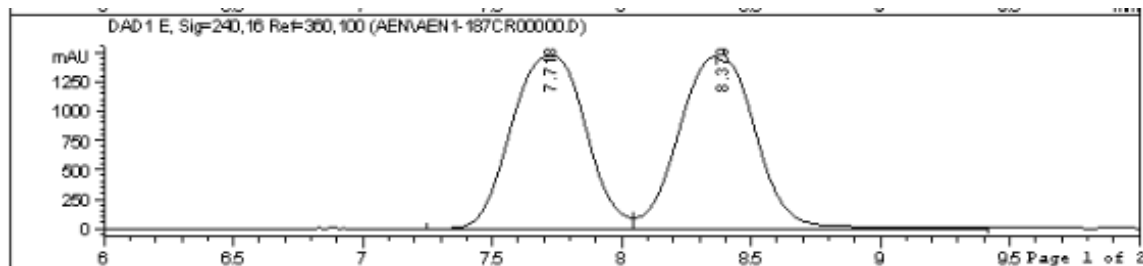

| Peak # | RetTime [min] | Type | Width [min] | Area [mAU*s] | Height [mAU] | Area %  |
|--------|---------------|------|-------------|--------------|--------------|---------|
| 1      | 7.718         | VV   | 0.2796      | 2.91989e4    | 1471.13245   | 49.2287 |
| 2      | 8.379         | VB   | 0.2491      | 3.01139e4    | 1481.52087   | 50.7713 |

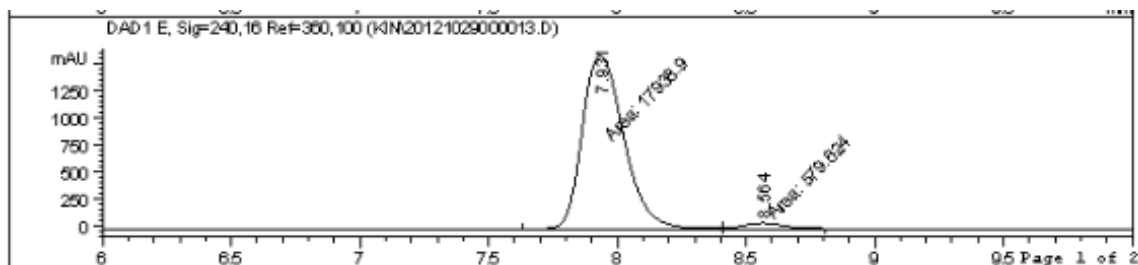

| Peak # | RetTime [min] | Type | Width [min] | Area [mAU*s] | Height [mAU] | Area %  |
|--------|---------------|------|-------------|--------------|--------------|---------|
| 1      | 7.931         | NM   | 0.1879      | 1.79389e4    | 1591.44592   | 96.8700 |
| 2      | 8.564         | NM   | 0.1829      | 579.62408    | 52.82064     | 3.1300  |

Enantiomeric excess (94% ee) was measured by HPLC (Chiralcel AD-H, 4% IPA/Hexanes, 1 mL/min,  $R_{t1} = 7.9$ ,  $R_{t2} = 8.6$ )

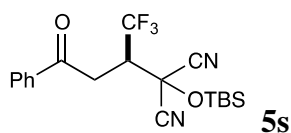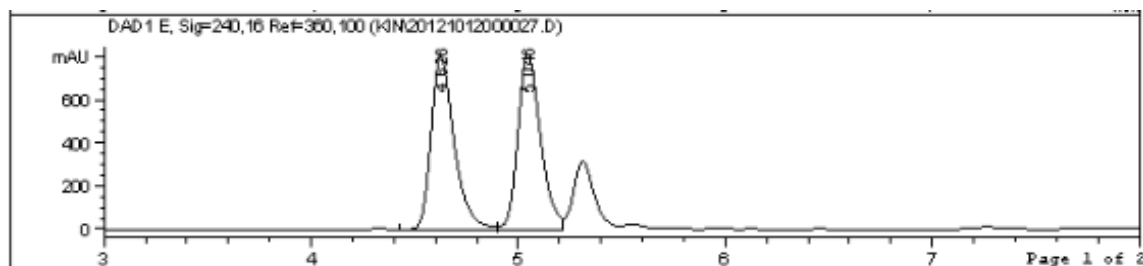

| Peak # | RetTime [min] | Type | Width [min] | Area [mAU*s] | Height [mAU] | Area %  |
|--------|---------------|------|-------------|--------------|--------------|---------|
| 1      | 4.626         | VV   | 0.1181      | 6241.74219   | 808.13513    | 50.2806 |
| 2      | 5.046         | VV   | 0.1168      | 6172.08496   | 811.05298    | 49.7194 |

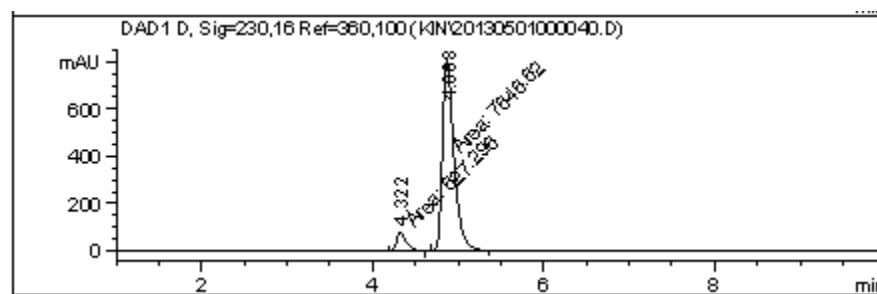

Signal 4: DAD1 D, Sig=230,16 Ref=360,100

| Peak # | RetTime [min] | Type | Width [min] | Area [mAU*s] | Height [mAU] | Area %  |
|--------|---------------|------|-------------|--------------|--------------|---------|
| 1      | 4.322         | MM   | 0.1271      | 627.29620    | 82.27028     | 7.5816  |
| 2      | 4.868         | MM   | 0.1563      | 7646.61719   | 815.23694    | 92.4184 |

Enantiomeric excess (85% ee) was measured by HPLC (Chiralcel OD-H, 1% IPA/Hexanes, 1 mL/min,  $R_{t1} = 4.3$ ,  $R_{t2} = 4.9$ )

## Functionalization of 5a (from TBS MAC)

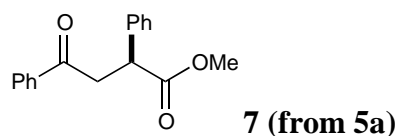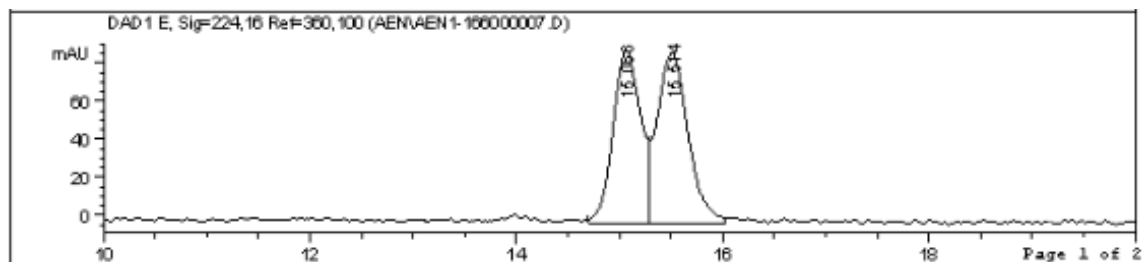

| Peak # | RetTime [min] | Type | Width [min] | Area [mAU*s] | Height [mAU] | Area %  |
|--------|---------------|------|-------------|--------------|--------------|---------|
| 1      | 15.066        | VV   | 0.2682      | 1713.73315   | 90.78651     | 47.7871 |
| 2      | 15.514        | VV   | 0.2840      | 1872.44946   | 90.27586     | 52.2129 |

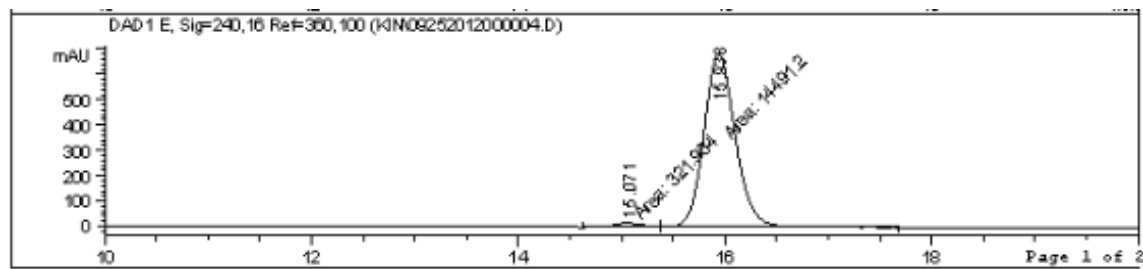

| Peak # | RetTime [min] | Type | Width [min] | Area [mAU*s] | Height [mAU] | Area %  |
|--------|---------------|------|-------------|--------------|--------------|---------|
| 1      | 15.071        | MF   | 0.3328      | 321.96436    | 16.12371     | 2.1735  |
| 2      | 15.938        | FM   | 0.3518      | 1.44912e4    | 686.59778    | 97.8265 |

Enantiomeric excess (96% ee) was measured by HPLC (Chiralcel IA, 3% IPA/Hexanes, 1 mL/min,  $R_{t1}$  = 15.1,  $R_{t2}$  = 15.9)

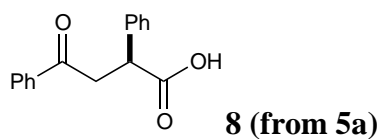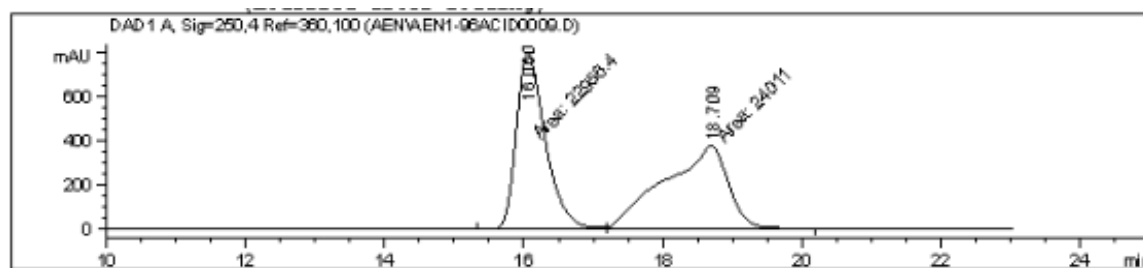

| Peak # | RetTime [min] | Type | Width [min] | Area [mAU*s] | Height [mAU] | Area %  |
|--------|---------------|------|-------------|--------------|--------------|---------|
| 1      | 16.060        | MF   | 0.4817      | 2.29564e4    | 794.25977    | 48.8772 |
| 2      | 18.709        | FM   | 1.0701      | 2.40110e4    | 373.97354    | 51.1228 |

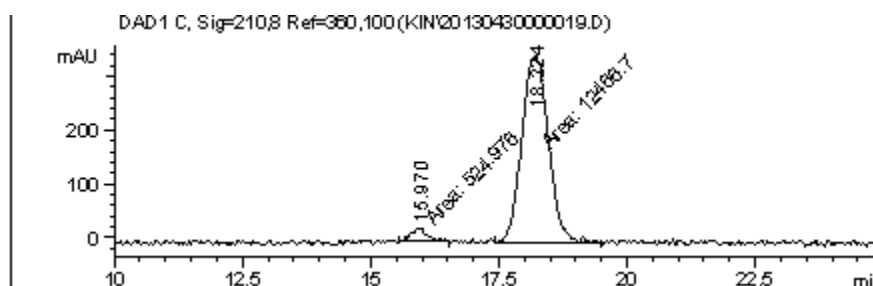

Signal 3: DAD1 C, Sig=210,8 Ref=360,100

| Peak # | RetTime [min] | Type | Width [min] | Area [mAU*s] | Height [mAU] | Area %  |
|--------|---------------|------|-------------|--------------|--------------|---------|
| 1      | 15.970        | MM   | 0.3514      | 524.97559    | 24.89707     | 4.0409  |
| 2      | 18.224        | MM   | 0.5973      | 1.24667e4    | 347.87949    | 95.9591 |

Enantiomeric excess (92% ee) was measured by HPLC (Chiralcel AD-H, 15% EtOH/Hexanes, 1.2 mL/min,  $R_{t1}$  = 16.0,  $R_{t2}$  = 18.2

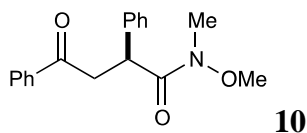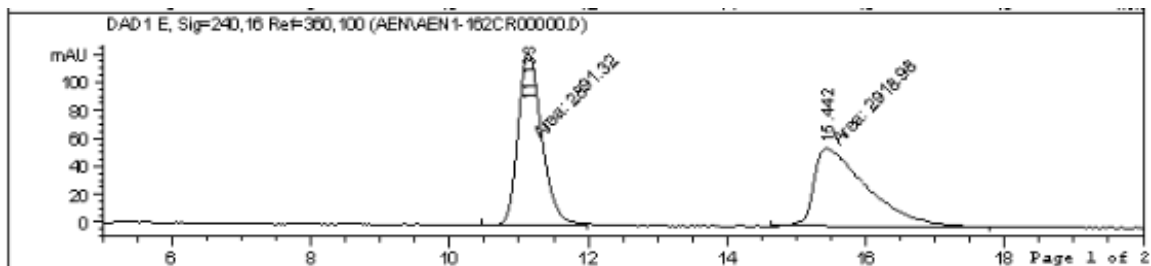

| Peak # | RetTime [min] | Type | Width [min] | Area [mAU*s] | Height [mAU] | Area %  |
|--------|---------------|------|-------------|--------------|--------------|---------|
| 1      | 11.133        | MM   | 0.3929      | 2891.32397   | 122.64952    | 49.7620 |
| 2      | 15.442        | MM   | 0.8765      | 2918.97583   | 55.50390     | 50.2380 |

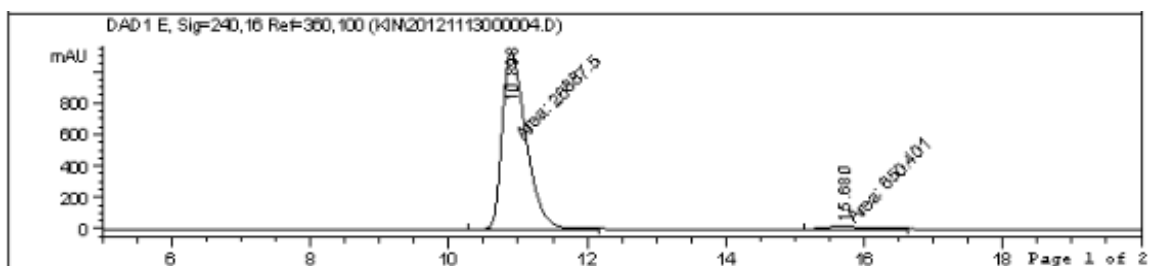

| Peak # | RetTime [min] | Type | Width [min] | Area [mAU*s] | Height [mAU] | Area %  |
|--------|---------------|------|-------------|--------------|--------------|---------|
| 1      | 10.898        | MM   | 0.4026      | 2.68875e4    | 1113.13074   | 97.6382 |
| 2      | 15.680        | MM   | 0.7047      | 650.40149    | 15.38233     | 2.3618  |

Enantiomeric excess (95% ee) was measured by HPLC (Chiralcel OD-H, 10% IPA/Hexanes, 1 mL/min,  $R_{t1} = 10.9$ ,  $R_{t2} = 15.7$ )

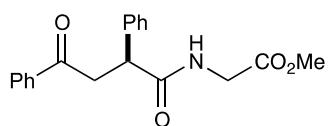**11**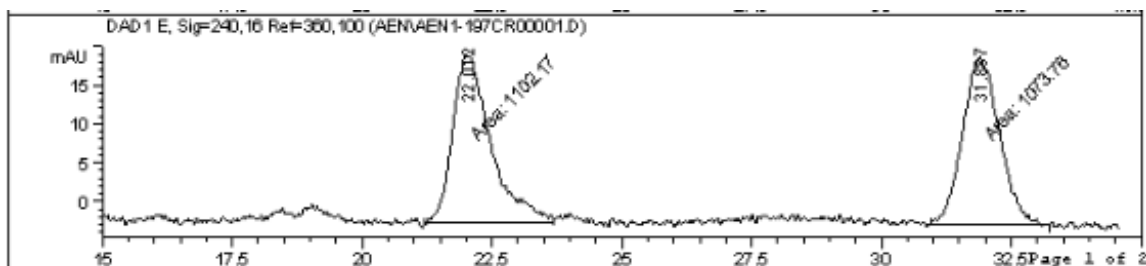

| Peak # | RetTime [min] | Type | Width [min] | Area [mAU*s] | Height [mAU] | Area %  |
|--------|---------------|------|-------------|--------------|--------------|---------|
| 1      | 22.012        | MM   | 0.8481      | 1102.16992   | 21.65931     | 50.6529 |
| 2      | 31.887        | MM   | 0.8245      | 1073.75647   | 21.70561     | 49.3471 |

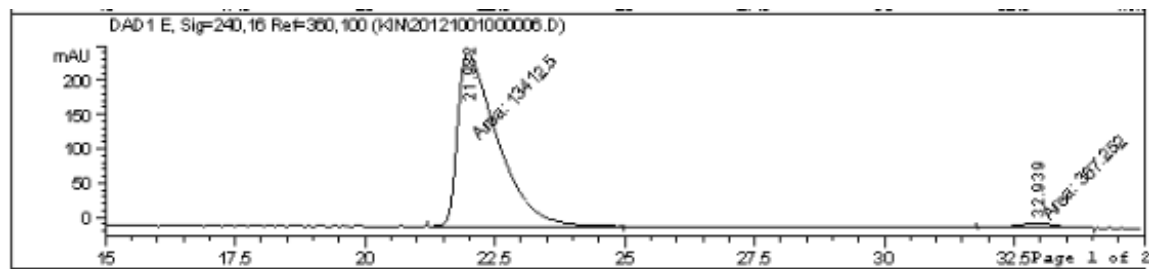

| Peak # | RetTime [min] | Type | Width [min] | Area [mAU*s] | Height [mAU] | Area %  |
|--------|---------------|------|-------------|--------------|--------------|---------|
| 1      | 21.982        | MM   | 0.8890      | 1.34125e4    | 251.44635    | 97.3348 |
| 2      | 32.939        | MM   | 0.7937      | 367.25244    | 7.71217      | 2.6652  |

Enantiomeric excess (95% ee) was measured by HPLC (Chiralcel IA, 20% EtOH/Hexanes, 1 mL/min,  $R_{t1} = 21.98$ ,  $R_{t2} = 32.9$ )



## Functionalization of 3a (from MOM MAC)

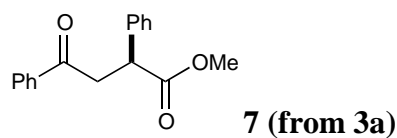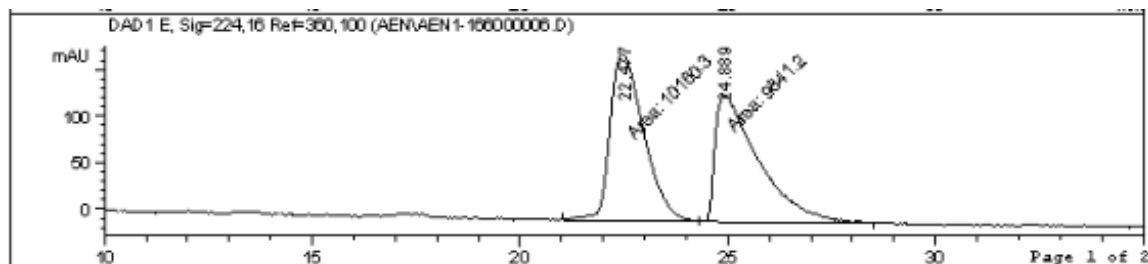

| Peak # | RetTime [min] | Type | Width [min] | Area [mAU*s] | Height [mAU] | Area %  |
|--------|---------------|------|-------------|--------------|--------------|---------|
| 1      | 22.477        | HM   | 0.9418      | 1.01603e4    | 179.80519    | 50.7976 |
| 2      | 24.889        | HM   | 1.2112      | 9841.20410   | 135.42393    | 49.2024 |

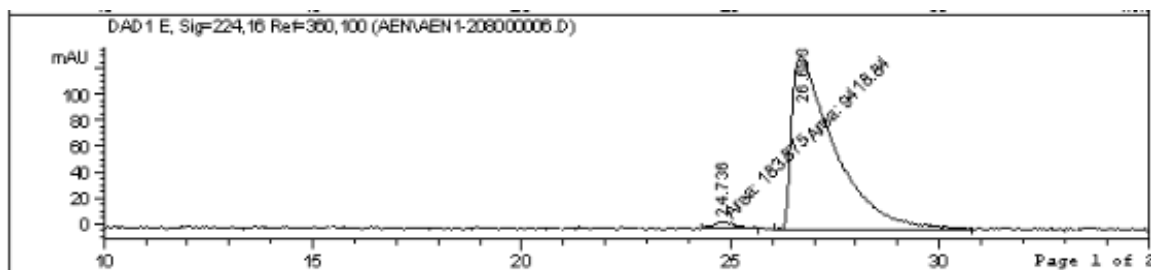

| Peak # | RetTime [min] | Type | Width [min] | Area [mAU*s] | Height [mAU] | Area %  |
|--------|---------------|------|-------------|--------------|--------------|---------|
| 1      | 24.736        | HM   | 0.6287      | 183.87469    | 4.87474      | 1.9148  |
| 2      | 26.683        | HM   | 1.1708      | 9418.83789   | 134.08101    | 98.0852 |

Enantiomeric excess (96% ee) was measured by HPLC (Chiralcel OD-H, 2% IPA/Hexanes, 1 mL/min,  $R_{t1} = 24.7$ ,  $R_{t2} = 26.7$ )

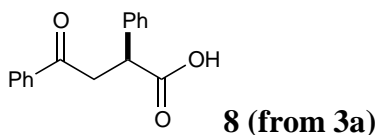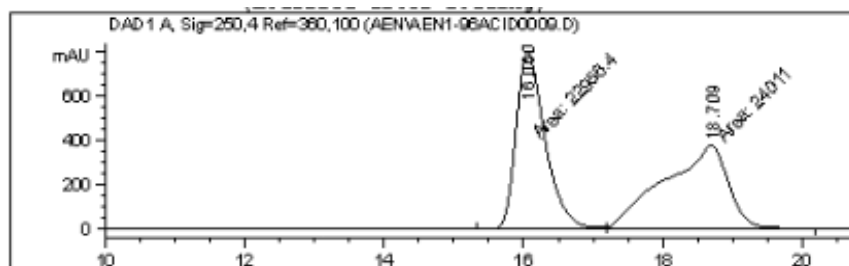

| Peak # | RetTime [min] | Type | Width [min] | Area [mAU*s] | Height [mAU] | Area %  |
|--------|---------------|------|-------------|--------------|--------------|---------|
| 1      | 16.060        | MF   | 0.4817      | 2.29564e4    | 794.25977    | 48.8772 |
| 2      | 18.709        | FM   | 1.0701      | 2.40110e4    | 373.97354    | 51.1228 |

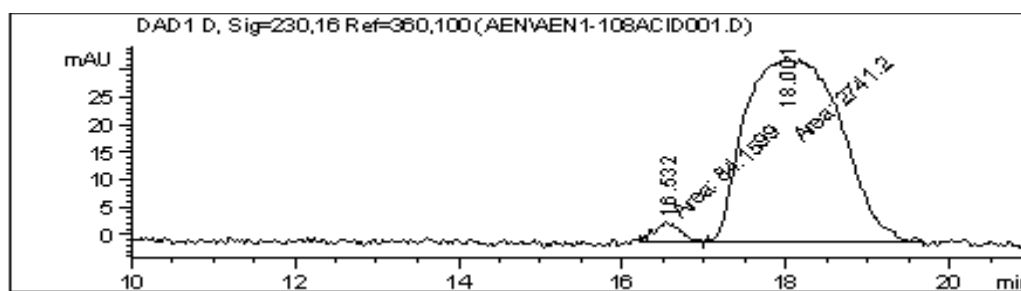

Signal 4: DAD1 D, Sig=230,16 Ref=360,100

| Peak #   | RetTime [min] | Type | Width [min] | Area [mAU*s] | Height [mAU] | Area %  |
|----------|---------------|------|-------------|--------------|--------------|---------|
| 1        | 16.532        | MM   | 0.3754      | 84.15991     | 3.73598      | 2.9787  |
| 2        | 18.001        | MM   | 1.3431      | 2741.19849   | 34.01572     | 97.0213 |
| Totals : |               |      |             | 2825.35840   | 37.75170     |         |

Enantiomeric excess (94% ee) was measured by HPLC (Chiralcel AD-H, 15% EtOH/Hexanes, 1.2 mL/min,  $R_{t1} = 16.5$ ,  $R_{t2} = 18.0$ )

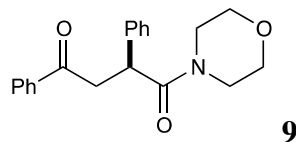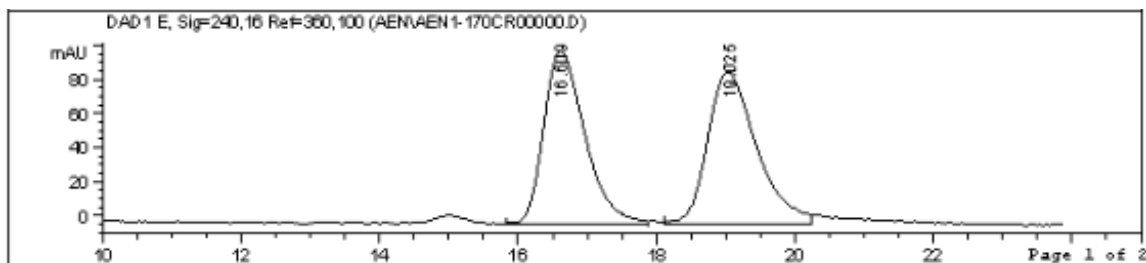

| Peak # | RetTime [min] | Type | Width [min] | Area [mAU*s] | Height [mAU] | Area %  |
|--------|---------------|------|-------------|--------------|--------------|---------|
| 1      | 16.609        | VV   | 0.5032      | 4234.32275   | 102.23381    | 48.6180 |
| 2      | 19.025        | VV   | 0.6030      | 4475.04443   | 89.86695     | 51.3820 |

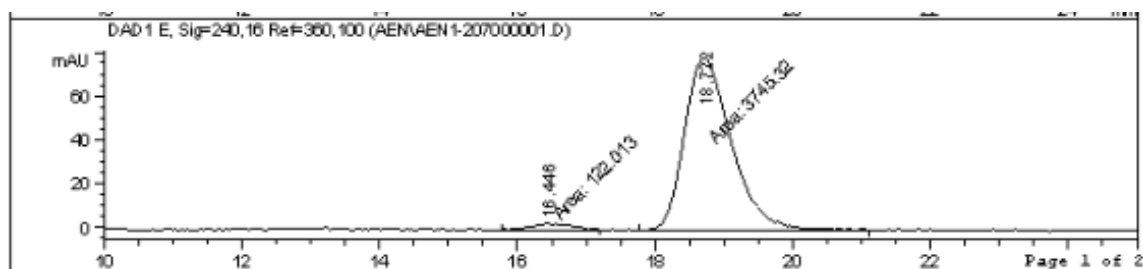

| Peak # | RetTime [min] | Type | Width [min] | Area [mAU*s] | Height [mAU] | Area %  |
|--------|---------------|------|-------------|--------------|--------------|---------|
| 1      | 16.446        | MM   | 0.6867      | 122.01315    | 2.96147      | 3.1550  |
| 2      | 18.722        | MM   | 0.7946      | 3745.31860   | 78.56207     | 96.8450 |

Enantiomeric excess (94% ee) was measured by HPLC (Chiralcel OD-H, 10% IPA/Hexanes, 1 mL/min,  $R_{t1} = 16.4$ ,  $R_{t2} = 18.7$ )

## Synthesis of Succinic Diester 13

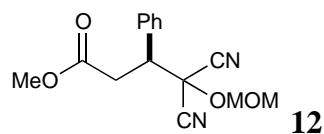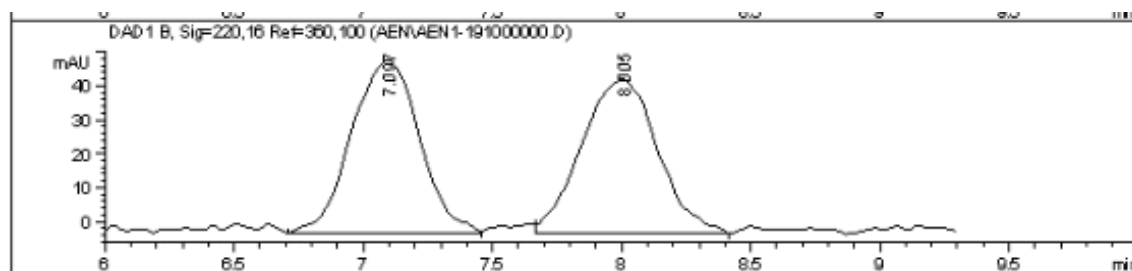

| Peak # | RetTime [min] | Type | Width [min] | Area [mAU*s] | Height [mAU] | Area %  |
|--------|---------------|------|-------------|--------------|--------------|---------|
| 1      | 7.097         | VV   | 0.2257      | 936.98352    | 51.16410     | 49.9831 |
| 2      | 8.005         | VV   | 0.2545      | 937.61743    | 45.87346     | 50.0169 |

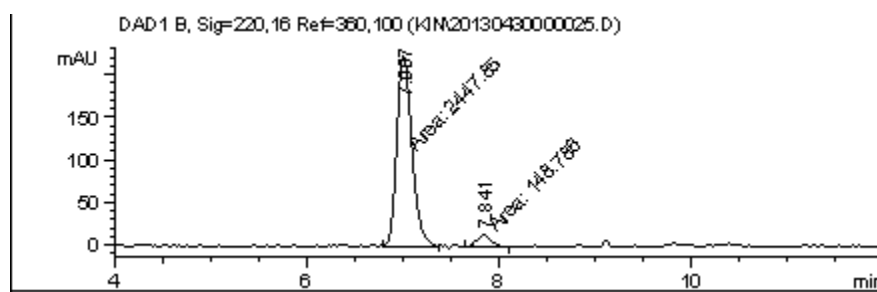

Signal 2: DAD1 B, Sig=220,16 Ref=360,100

| Peak # | RetTime [min] | Type | Width [min] | Area [mAU*s] | Height [mAU] | Area %  |
|--------|---------------|------|-------------|--------------|--------------|---------|
| 1      | 7.007         | MM   | 0.1824      | 2447.84839   | 223.69003    | 94.2700 |
| 2      | 7.841         | MM   | 0.1773      | 148.78606    | 13.98635     | 5.7300  |

Enantiomeric excess (88% ee) was measured by HPLC (Chiralcel AD-H, 7% IPA/Hexanes, 1 mL/min,  $R_{t1} = 7.0$ ,  $R_{t2} = 7.9$ )

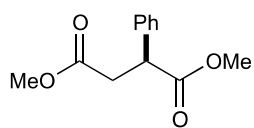**13**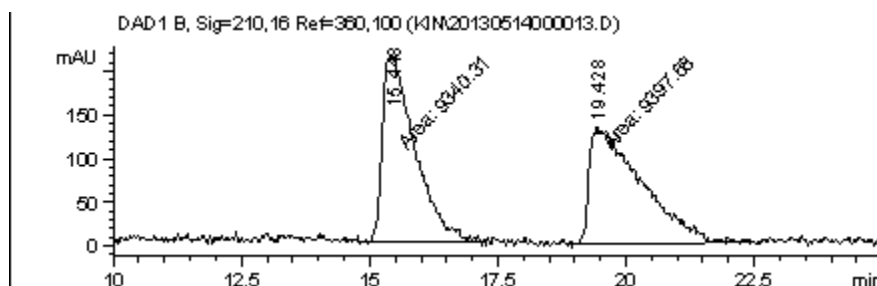

Signal 2: DAD1 B, Sig=210,16 Ref=360,100

| Peak # | RetTime [min] | Type | Width [min] | Area [mAU*s] | Height [mAU] | Area %  |
|--------|---------------|------|-------------|--------------|--------------|---------|
| 1      | 15.448        | MM   | 0.7289      | 9340.30664   | 213.57330    | 49.8469 |
| 2      | 19.428        | MM   | 1.1704      | 9397.67676   | 133.82965    | 50.1531 |

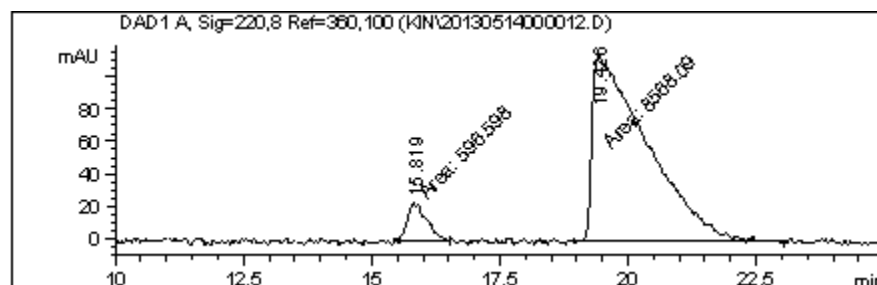

Signal 1: DAD1 A, Sig=220,8 Ref=360,100

| Peak #   | RetTime [min] | Type | Width [min] | Area [mAU*s] | Height [mAU] | Area %  |
|----------|---------------|------|-------------|--------------|--------------|---------|
| 1        | 15.819        | MM   | 0.4263      | 596.59814    | 23.32297     | 6.5097  |
| 2        | 19.426        | MM   | 1.2345      | 8568.09473   | 115.67506    | 93.4903 |
| Totals : |               |      |             | 9164.69287   | 138.99802    |         |

Enantiomeric excess (87% ee) was measured by HPLC (Chiralcel IA, 1% IPA/Hexanes, 1 mL/min,  $R_{t1}$  = 15.7,  $R_{t2}$  = 19.4

## Total Synthesis of Fornicin C

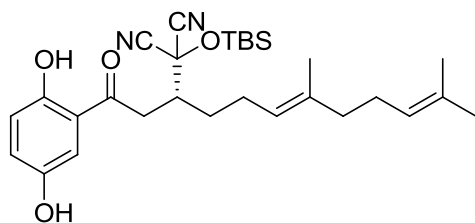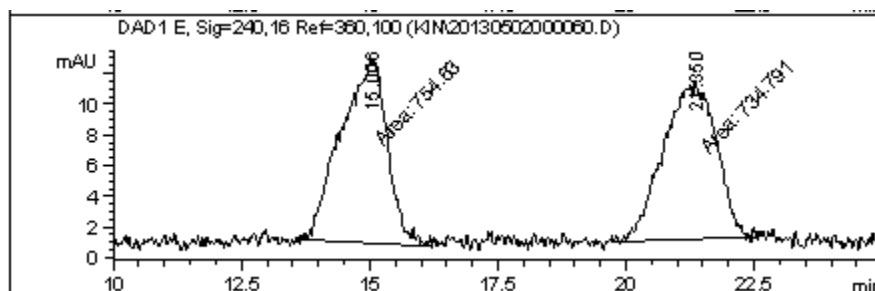

Signal 5: DAD1 E, Sig=240,16 Ref=360,100

| Peak # | RetTime [min] | Type | Width [min] | Area [mAU*s] | Height [mAU] | Area %  |
|--------|---------------|------|-------------|--------------|--------------|---------|
| 1      | 15.006        | MM   | 1.0478      | 754.63000    | 12.00335     | 50.6660 |
| 2      | 21.350        | MM   | 1.1817      | 734.79138    | 10.36392     | 49.3340 |

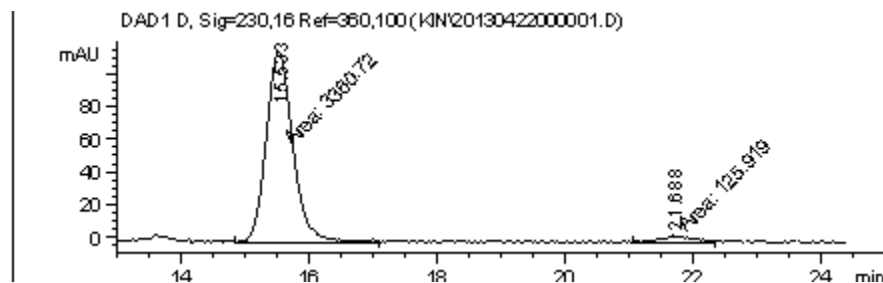

Signal 4: DAD1 D, Sig=230,16 Ref=360,100

| Peak # | RetTime [min] | Type | Width [min] | Area [mAU*s] | Height [mAU] | Area %  |
|--------|---------------|------|-------------|--------------|--------------|---------|
| 1      | 15.533        | MM   | 0.4797      | 3360.71973   | 116.75571    | 96.3885 |
| 2      | 21.688        | MM   | 0.5348      | 125.91933    | 3.92410      | 3.6115  |

Enantiomeric excess (92% ee) was measured by HPLC (Chiralcel AD-H, 2% IPA/Hexanes, 1 mL/min,  $R_{t1} = 15.5$ ,  $R_{t2} = 21.7$ )

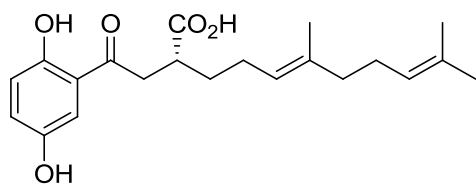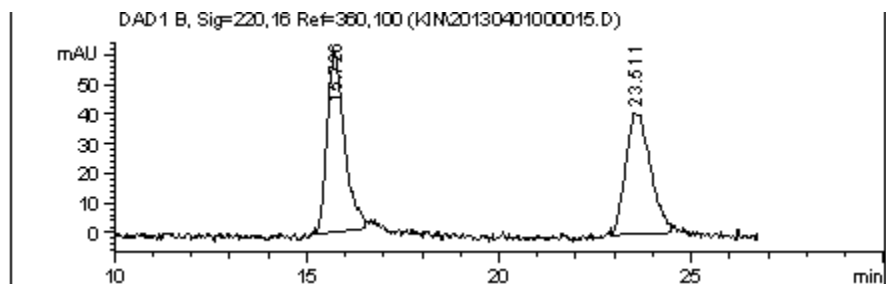

Signal 2: DAD1 B, Sig=220,16 Ref=360,100

| Peak # | RetTime [min] | Type | Width [min] | Area [mAU*s] | Height [mAU] | Area %  |
|--------|---------------|------|-------------|--------------|--------------|---------|
| 1      | 15.726        | BB   | 0.3924      | 1914.93445   | 61.31244     | 51.0808 |
| 2      | 23.511        | BB   | 0.5446      | 1833.89917   | 41.10149     | 48.9192 |

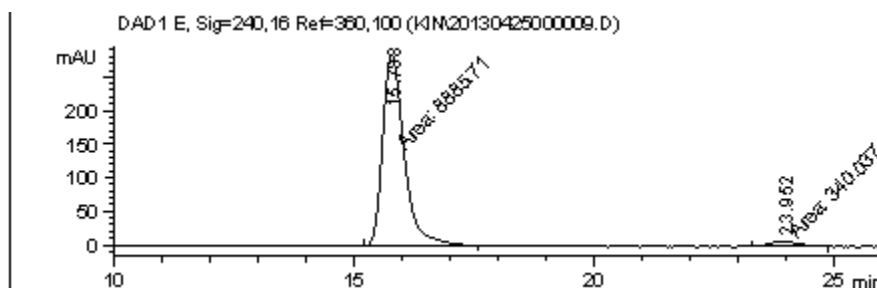

Signal 5: DAD1 E, Sig=240,16 Ref=360,100

| Peak # | RetTime [min] | Type | Width [min] | Area [mAU*s] | Height [mAU] | Area %  |
|--------|---------------|------|-------------|--------------|--------------|---------|
| 1      | 15.788        | MM   | 0.5203      | 8885.71094   | 284.61926    | 96.3143 |
| 2      | 23.952        | MM   | 0.7529      | 340.03668    | 7.52726      | 3.6857  |

Enantiomeric excess (92% ee) was measured by HPLC (Chiralcel AD-H, 10% IPA/Hexanes, 1 mL/min,  $R_{t1} = 15.8$ ,  $R_{t2} = 24.0$ )
